# Supplementary material for: Molecular editing of NSC-666719 enabling discovery of benzodithiazinedioxide-guanidines as anticancer agents
Source: Royal Society of Chemistry journal article supplement (doi:10.1039/d3md00648d), 2024-01-01
Supplement: d3md00648d1.pdf [file d3md00648d1.pdf]

## *Supporting Information*

### **Molecular Editing of NSC-666719 Enabling Discovery of Benzodithiazinedioxide-guanidines as Anticancer Agents**

Vajja Krishna Rao,<sup>1</sup> Subarno Paul,<sup>2</sup> Mitchell Gulkis,<sup>3</sup> Zhihang Shen,<sup>4</sup> Haritha Nair,<sup>5</sup> Amandeep Singh,<sup>6</sup> Chenglong Li,<sup>4</sup> Chinmay Das,<sup>2</sup> Biswajit Das,<sup>2</sup> Arun K. Sharma,<sup>6</sup> Melike Çağlayan,<sup>3</sup> Chanakya N. Kundu,<sup>2\*</sup> Satya Narayan<sup>5\*</sup> and Sankar K. Guchhait<sup>1\*</sup>

<sup>1</sup>*Department of Medicinal Chemistry, National Institute of Pharmaceutical Education and Research (NIPER), Sector 67, SAS Nagar, Mohali, Punjab 160062, India*

<sup>2</sup>*Cancer Biology Division, School of Biotechnology, Kalinga Institute of Industrial Technology (KIIT), Deemed to be University, Campus-11, Patia, Bhubaneswar-751024, Odisha, India*

<sup>3</sup>*Department of Biochemistry and Molecular Biology, College of Medicine, 1200 Newell Drive, University of Florida, Gainesville, FL 32610, USA*

<sup>4</sup>*Department of Medicinal Chemistry, College of Pharmacy, 1345 Center Drive, University of Florida, Gainesville, FL 32610, USA*

<sup>5</sup>*Department of Anatomy and Cell Biology, College of Medicine, 1200 Newell Drive, University of Florida, Gainesville, FL 32610, USA*

<sup>6</sup>*Department of Pharmacology, Penn State Cancer Institute, CH72, Penn State College of Medicine, 500 University Drive, Hershey, PA 17033, USA*

**\*Corresponding authors:** Sankar K. Guchhait ([skguchhait@niper.ac.in](mailto:skguchhait@niper.ac.in)), Satya Narayan ([snarayan@ufl.edu](mailto:snarayan@ufl.edu)), and Chanakya Nath Kundu ([cnkundu@kiitbiotech.ac.in](mailto:cnkundu@kiitbiotech.ac.in))

## Table of Contents

|                                                                                                                              |     |
|------------------------------------------------------------------------------------------------------------------------------|-----|
| 1 Supporting Figures, Tables, Schemes: .....                                                                                 | S3  |
| 2 Characterization data for <i>N</i> -heteroarylguanidine hydrochlorides ( <b>8g-8z</b> , <b>8aa</b> and <b>8bb</b> ): ..... | S6  |
| 3 <sup>1</sup> H-NMR and <sup>13</sup> C-NMR spectra of final compounds ( <b>10a-z</b> ):.....                               | S11 |
| 4 HRMS (ESI+) Spectra of representative compounds ( <b>10a-z</b> and <b>11a-s</b> ): .....                                   | S56 |
| 5 HPLC traces of <b>11a</b> , <b>10e</b> and <b>10q</b> .....                                                                | S69 |
| 6 X-ray crystallography data of <b>10b</b> .....                                                                             | S71 |
| 7 References: .....                                                                                                          | S72 |

## 1 Supporting Figures, Tables, Schemes:

### Synthesis of *N*-arylguanidines from aromatic amines

For the synthesis of *N*-arylguanidines from aromatic amines, we screened various methods[1-4] known for the reaction of arylamines and cyanamide (Table S1). All these reactions continued up to 24 hours provided *N*-*p*-Methoxyphenylguanidine hydrochloride in low to moderate yield. In the Sc(OTf)<sub>3</sub>-catalyzed reaction, product formed in moderate yield. Then, reactions using microwave irradiation conditions were performed. Various catalysts, such as copper (I) and copper (II), ZnCl<sub>2</sub>, FeCl<sub>3</sub>, and AlCl<sub>3</sub> were evaluated. AlCl<sub>3</sub> was found to be most effective and provided very good yield of the product (80%). The reaction with AlCl<sub>3</sub>-catalysis and performed at higher temperature (130 °C) produced the desired phenylguanidine hydrochloride in excellent yield (94%).

**Table S1:** Evaluation of catalysts for the synthesis of *N*-4-Methoxyphenylguanidine hydrochloride under microwave irradiation[1-5]

Reaction scheme: 4-methoxyaniline + H<sub>2</sub>N-C≡N (50% W/W)  $\xrightarrow{\text{Brønsted acid or Lewis acid}}$  *N*-4-methoxyphenylguanidine hydrochloride (or HNO<sub>3</sub> salt)

| S. No. <sup>a</sup> | Acid or Lewis acid             | Solvent                             | Conditions         | % yield |
|---------------------|--------------------------------|-------------------------------------|--------------------|---------|
| 1.                  | Excess HCl                     | H <sub>2</sub> O                    | 100 °C, 24 h       | 48      |
| 2.                  | Excess HNO <sub>3</sub>        | 1, 4 Dioxane                        | 100 °C, 24 h       | 53      |
| 3.                  | Sc(OTf) <sub>3</sub> (10 mol%) | H <sub>2</sub> O:1, 4 Dioxane (1:1) | 100 °C, 24 h       | 48      |
| 4.                  | CuCl                           | EtOH                                | μW, 100 °C, 10 min | 26      |
| 5.                  | CuBr                           | EtOH                                | μW, 100 °C, 10 min | 35      |
| 6.                  | CuCl <sub>2</sub>              | EtOH                                | μW, 100 °C, 10 min | 40      |
| 7.                  | CuBr <sub>2</sub>              | EtOH                                | μW, 100 °C, 10 min | 42      |
| 8.                  | Cu(OAc) <sub>2</sub>           | EtOH                                | μW, 100 °C, 10 min | 32      |
| 9.                  | Cu(OTf) <sub>2</sub>           | EtOH                                | μW, 100 °C, 10 min | 45      |
| 10.                 | ZnI <sub>2</sub>               | EtOH                                | μW, 100 °C, 10 min | 42      |
| 11.                 | ZnCl <sub>2</sub>              | EtOH                                | μW, 100 °C, 10 min | 65      |

|     |                   |      |                         |           |
|-----|-------------------|------|-------------------------|-----------|
| 12. | SnCl <sub>2</sub> | EtOH | $\mu$ W, 100 °C, 10 min | 41        |
| 13. | NiCl <sub>2</sub> | EtOH | $\mu$ W, 100 °C, 10 min | 40        |
| 14. | FeCl <sub>3</sub> | EtOH | $\mu$ W, 100 °C, 10 min | 72        |
| 15. | AlCl <sub>3</sub> | EtOH | $\mu$ W, 100 °C, 10 min | <b>80</b> |
| 16. | AlCl <sub>3</sub> | EtOH | $\mu$ W, 130 °C, 10 min | <b>94</b> |

<sup>a</sup> All reactions were performed at 1 mmol scale

**Table S2.** Synthesis of *N*--(hetero)arylguanidine hydrochlorides from Ar/HetAr-amines[1-4]

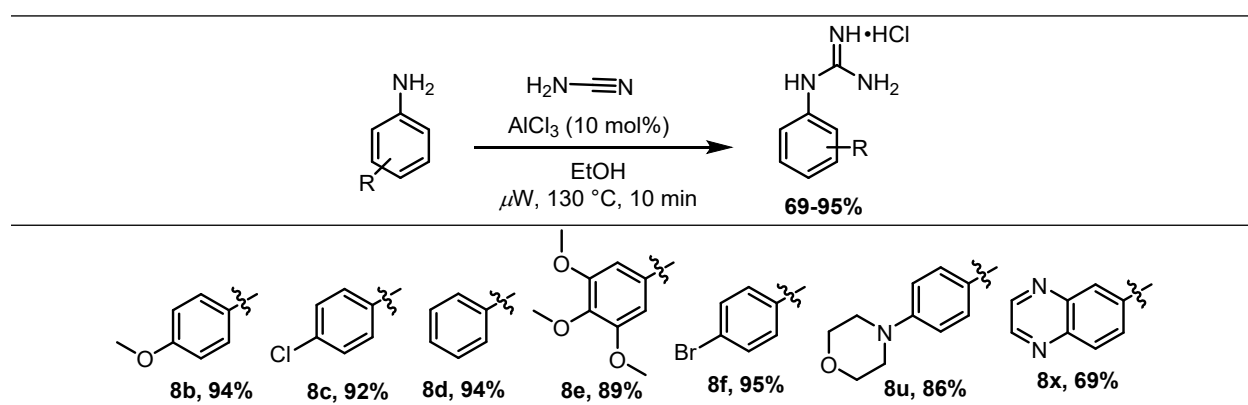

<sup>a</sup> All reactions were performed at 2 mmol scale.

**Table S3.** Synthesis of *N*--(hetero)arylguanidine hydrochlorides from Ar/HetAr-chlorides[6, 7]

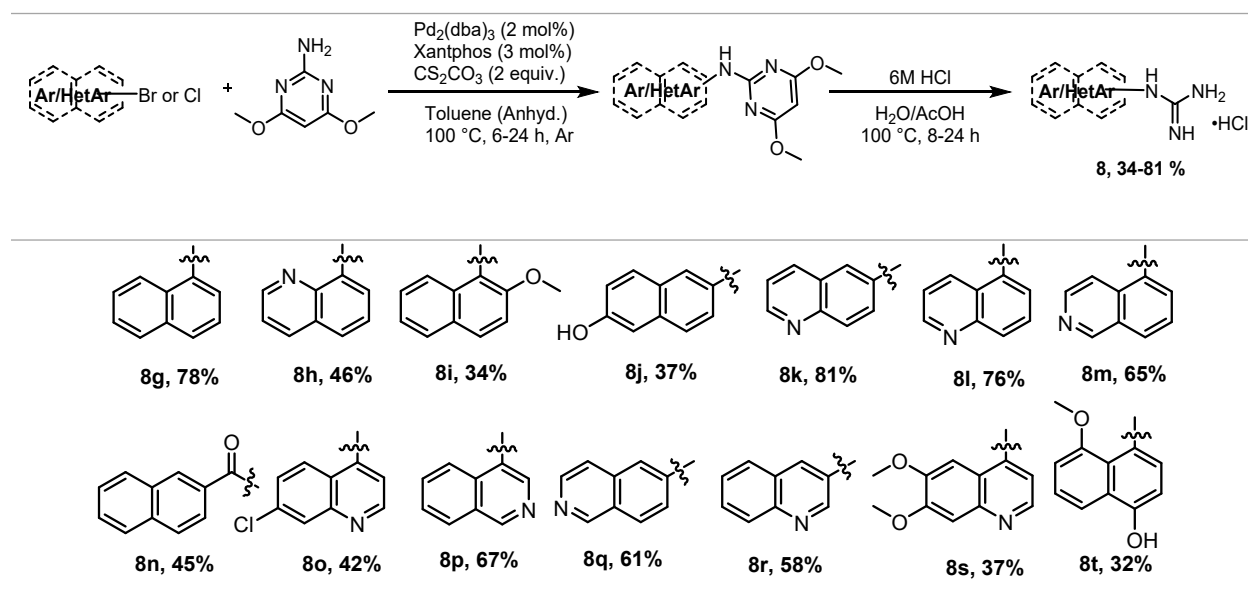

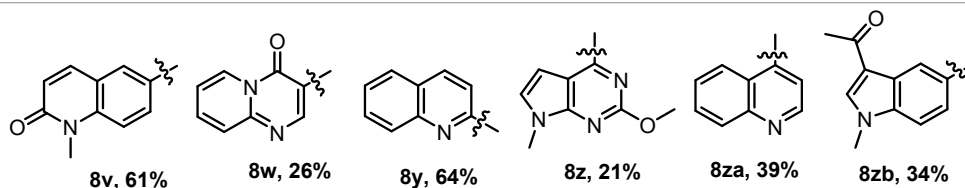

<sup>a</sup>All reactions were performed at 2 mmol scale.

### *In vitro* Polβ nucleotide insertion assays

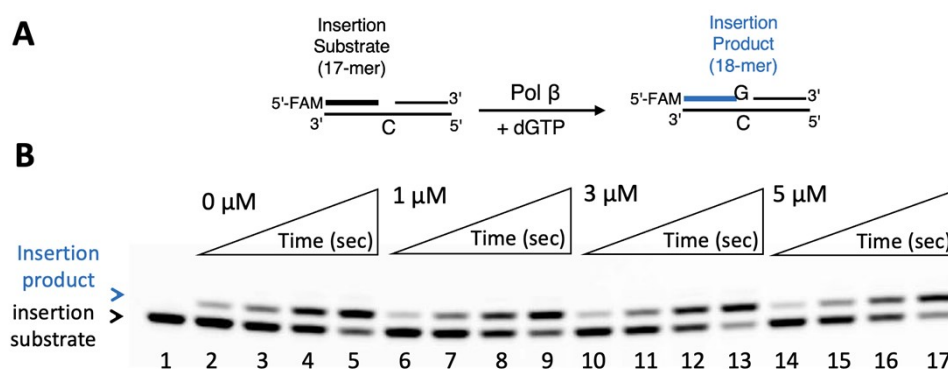

**Figure S1:** Impact of the best active compounds on Polβ activity. (A) Schematic of the insertion assay used to monitor the gap filling activity of Polβ. (B) Lane 1 is the negative enzyme control containing the reaction mixture and the gap DNA substrate but no Polβ. Lanes 2-5 are the positive control of Polβ dGTP:C insertion products in the absence of the compound. Lanes 6-9, 10-13, and 14-17 are Polβ dGTP:C insertion products in the presence 11a at concentrations of 1, 3, and 5  $\mu\text{M}$ , respectively, and correspond to time points of 15, 30, 45, and 60 sec.

**Table S4: Gap-DNA substrate used in pol β dGTP:C insertion assays.** One nucleotide gap-DNA substrate with template base C was used in the nucleotide insertion assays. FAM denotes a fluorescent tag and is located at 5'-end of DNA substrates. The base at the template position is underlined.

| Gap-DNA Substrate | Sequence                                                                                            |
|-------------------|-----------------------------------------------------------------------------------------------------|
| Template C        | 5' -FAM-CATGGGCGGCATGAACC GAGGCCCATCCTCACC-3'<br>3' -GTACCCGCCGTACTTGG <u>C</u> CTCCGGGTAGGAGTGG-5' |

## 2 Characterization data for *N*-heteroarylguanidine hydrochlorides (**8g-8z**, **8aa** and **8bb**):

**1-(Naphthalen-1-yl)guanidine hydrochloride (Table S3, 8g):** Purification by column chromatography (MeOH-DCM, 2:10 V/V) afforded **8g**; Purple semisolid (yield 78%); <sup>1</sup>H NMR (500 MHz, DMSO-*d*<sub>6</sub>): δ 7.99-7.90 (m, 3H), 7.76 (broad singlet, 1H [NH]), 7.60-7.51 (m, 3H), 7.43 (d, *J* = 8 Hz, 1H). <sup>13</sup>C NMR {1H} (125 MHz, DMSO-*d*<sub>6</sub>): δ 157.8, 134.6, 131.3, 130.0, 128.8, 128.3, 127.4, 127.2, 126.5, 125.2, 122.7; LCMS-LTQ (ESI+) calcd for C<sub>11</sub>H<sub>11</sub>N<sub>3</sub><sup>+</sup> [M+H]<sup>+</sup> 186.10, found 185.93.

**1-(Quinolin-8-yl)guanidine hydrochloride (Table S3, 8h):** Purification by column chromatography (MeOH-DCM, 2:10 V/V) afforded **8h**; Yellow semisolid (yield 46%); <sup>1</sup>H NMR (500 MHz, DMSO-*d*<sub>6</sub>): δ 8.94 (d, *J* = 3 Hz, 1H), 8.44 (d, *J* = 8 Hz, 1H), 7.90 (d, *J* = 3.5, 1H), 7.74 (broad singlet, 2H [NH]), 7.69 (d, *J* = 7.5 Hz, 1H), 7.63-7.60 (m, 2H), 7.28 (broad singlet, 2H [NH]); <sup>13</sup>C NMR {1H} (125 MHz, DMSO-*d*<sub>6</sub>): δ 157.1, 150.4, 142.4, 137.0, 134.5, 129.3, 127.3, 125.7, 124.0, 122.6; LCMS-LTQ (ESI+) calcd for C<sub>10</sub>H<sub>11</sub>N<sub>4</sub><sup>+</sup> [M+H]<sup>+</sup> 187.22, found 186.92.

**1-(2-Methoxynaphthalen-1-yl)guanidine hydrochloride (Table S3, 8i):** Purification by column chromatography (MeOH-DCM, 2:10 V/V) afforded **8i**; Pale pink semisolid (yield 34%); <sup>1</sup>H NMR (500 MHz, DMSO-*d*<sub>6</sub>): δ 7.87 (d, *J* = 7.8 Hz, 1H), 7.78-7.75 (m, 2H), 7.38 (d, *J* = 7.8 Hz, 1H), 7.33-7.30 (m, 2H), 5.99 (broad singlet, 3H [NH]), 3.90 (s, 3H); <sup>13</sup>C NMR {1H} (125 MHz, DMSO-*d*<sub>6</sub>): δ 157.8, 153.6, 131.9, 130.0, 129.2, 128.6, 127.8, 127.2, 124.5, 121.8, 115.0, 56.8; LCMS-LTQ (ESI+) calcd for C<sub>12</sub>H<sub>14</sub>N<sub>3</sub>O<sup>+</sup> [M+H]<sup>+</sup> 216.26, found 215.93.

**1-(6-Hydroxynaphthalen-2-yl)guanidine hydrochloride (Table S3, 8j):** Purification by column chromatography (MeOH-DCM, 2:10 V/V) afforded **8j**; Pale pink semisolid (yield 37%); <sup>1</sup>H NMR (500 MHz, DMSO-*d*<sub>6</sub>): δ 7.74 (s, 1H), 7.56 (dd, *J* = 16.8, 8.8 Hz, 2H), 7.29 (s, 1H), 7.07 – 6.97 (m, 3H), 4.54 (broad singlet, 3H [NH]); <sup>13</sup>C NMR {1H} (125 MHz, DMSO-*d*<sub>6</sub>): δ 155.4, 155.2, 132.02, 128.9, 128.7, 127.3, 124.9, 120.5, 119.4, 109.1; LCMS-LTQ (ESI+) calcd for C<sub>11</sub>H<sub>12</sub>N<sub>3</sub>O<sup>+</sup> [M+H]<sup>+</sup> 202.23, found 201.91.

**1-(Quinolin-6-yl)guanidine hydrochloride (Table S3, 8k):** Purification by column chromatography (MeOH-DCM, 2:10 V/V) afforded **8k**; Yellow semisolid (yield 81%); <sup>1</sup>H NMR (500 MHz, DMSO-*d*<sub>6</sub>): δ 8.88 – 8.80 (m, 1H), 8.33 (d, *J* = 8.0 Hz, 1H), 8.01 (d, *J* = 8.9 Hz, 1H),

7.90 (broad singlet, 2H [NH]), 7.79 (d,  $J = 2.2$  Hz, 1H), 7.54 (ddd,  $J = 12.5, 8.5, 3.1$  Hz, 2H), 7.23 (s, 3H);  $^{13}\text{C}$  NMR {1H} (125 MHz, DMSO- $d_6$ ):  $\delta$  156.9, 150.9, 146.3, 136.4, 134.1, 130.9, 128.8, 127.1, 122.5, 122.1; LCMS-LTQ (ESI+) calcd for  $\text{C}_{10}\text{H}_{11}\text{N}_4^+$  [M+H] $^+$  187.22, found 186.88.

**1-(Quinolin-5-yl)guanidine hydrochloride (Table 3, 8l):** Purification by column chromatography (MeOH-DCM, 2:10 V/V) afforded **8l**; Yellow semisolid (yield 76%);  $^1\text{H}$  NMR (500 MHz, DMSO- $d_6$ ):  $\delta$  8.82 – 8.70 (m, 1H), 8.37 (d,  $J = 8.5$  Hz, 1H), 7.60 – 7.48 (m, 2H), 7.37 (dd,  $J = 8.5, 3.9$  Hz, 1H), 6.99 (d,  $J = 6.8$  Hz, 1H), 6.00 (broad singlet, 4H [NH]);  $^{13}\text{C}$  NMR {1H} (125 MHz, DMSO- $d_6$ ):  $\delta$  167.6, 154.7, 150.4, 149.5, 132.9, 130.3, 125.1, 122.3, 120.4, 119.0; LCMS-LTQ (ESI+) calcd for  $\text{C}_{10}\text{H}_{11}\text{N}_4^+$  [M+H] $^+$  187.22, found 186.91.

**1-(Isoquinolin-5-yl)guanidine hydrochloride (Table 3, 8m):** Purification by column chromatography (MeOH-DCM, 2:10 V/V) afforded **8m**; Yellow semisolid (yield 65%);  $^1\text{H}$  NMR (500 MHz, DMSO- $d_6$ ):  $\delta$  9.35 (s, 1H), 8.55 (d,  $J = 7.3$  Hz, 1H), 8.08 (d,  $J = 7.3$  Hz, 1H), 7.76 (s, 1H), 7.69-7.67 (m, 2H), 7.31 (broad singlet, 4H [NH]);  $^{13}\text{C}$  NMR {1H} (125 MHz, DMSO- $d_6$ ):  $\delta$  13C NMR (125 MHz, DMSO-  $d_6$ )  $\delta$  157.3, 153.1, 144.1, 132.6, 131.9, 129.6, 129.0, 128.2, 127.3, 115.8; LCMS-LTQ (ESI+) calcd for  $\text{C}_{10}\text{H}_{11}\text{N}_4^+$  [M+H] $^+$  187.22, found 186.97.

**N-Carbamimidoyl-2-naphthamide hydrochloride (Table S3, 8n):** Purification by column chromatography (MeOH-DCM, 1:10 V/V) afforded **8n**; White solid (yield 45%);  $^1\text{H}$  NMR (500 MHz, DMSO- $d_6$ ):  $\delta$  8.62 (s, 1H), 8.29 – 7.91 (m, 3H), 7.87 (dd,  $J = 16.6, 8.2$  Hz, 2H), 7.50 (dq,  $J = 13.0, 6.5$  Hz, 2H), 6.77 (broad singlet, 2H [NH]);  $^{13}\text{C}$  NMR {1H} (125 MHz, DMSO- $d_6$ ):  $\delta$  176.2, 163.5, 137.1, 134.6, 132.8, 129.4, 129.1, 128.0, 127.5, 126.6, 126.3; LCMS-LTQ (ESI+) calcd for  $\text{C}_{12}\text{H}_{12}\text{N}_3\text{O}^+$  [M+H] $^+$  214.24, found 213.92.

**1-(7-Chloroquinolin-4-yl)guanidine hydrochloride (Table S3, 8o):** Purification by column chromatography (MeOH-DCM, 2:10 V/V) afforded **8o**; Yellow semisolid (yield 42%);  $^1\text{H}$  NMR (500 MHz, DMSO- $d_6$ ):  $\delta$  8.39 (d,  $J = 8.5$  Hz, 1H), 8.23 (d,  $J = 8.5$  Hz, 1H), 7.80 (s, 1H), 7.37 (d,  $J = 8.5$ , 1H), 6.59 (d,  $J = 6.8$  Hz, 1H), 7.03 (broad singlet, 4H [NH]);  $^{13}\text{C}$  NMR {1H} (125 MHz, DMSO- $d_6$ ):  $\delta$  158.2, 153.2, 144.1, 137.4, 136.7, 132.3, 131.0, 130.5, 129.5, 128.1, 127.6, 126.7, 115.9; LCMS-LTQ (ESI+) calcd for  $\text{C}_{10}\text{H}_{10}\text{ClN}_4^+$  [M+H] $^+$  221.66, found 220.89.

**1-(Isoquinolin-4-yl)guanidine hydrochloride (Table S3, 8p):** Purification by column chromatography (MeOH-DCM, 2:10 V/V) afforded **8p**; Yellow semisolid (yield 67%);  $^1\text{H}$  NMR (500 MHz, DMSO- $d_6$ ):  $\delta$  8.67 (d,  $J = 2.2$  Hz, 1H), 8.40 (s, 3H), 8.03 (d,  $J = 2.3$  Hz, 1H), 7.96 (d,

$J = 8.3$  Hz, 1H), 7.91 (d,  $J = 8.1$  Hz, 1H), 7.69 – 7.63 (m, 1H), 7.56 (t,  $J = 7.2$  Hz, 1H), 5.44 (s, 1H);  $^{13}\text{C}$  NMR {1H} (125 MHz, DMSO- $d_6$ ):  $\delta$  13C NMR (126 MHz, DMSO- $D_6$ )  $\delta$  160.2, 148.4, 145.4, 132.6, 129.1, 129.0, 128.5, 128.3, 128.3, 127.5; LCMS-LTQ (ESI+) calcd for  $\text{C}_{10}\text{H}_{11}\text{N}_4^+$  [M+H] $^+$  187.22, found 186.88.

**1-(Isoquinolin-6-yl)guanidine hydrochloride (Table S3, 8q):** Purification by column chromatography (MeOH-DCM, 2:10 V/V) afforded **8q**; Yellow semisolid (yield 61%);  $^1\text{H}$  NMR (500 MHz, DMSO- $d_6$ ):  $\delta$  9.26 (s, 1H), 8.46 (s, 1H), 8.15 (d,  $J = 8.5$  Hz, 1H), 8.01 – 7.70 (m, 5H), 7.49 (d,  $J = 8.0$  Hz, 1H), 5.43 (s, 1H);  $^{13}\text{C}$  NMR {1H} (125 MHz, DMSO- $d_6$ ):  $\delta$  13C NMR (126 MHz, DMSO- $d_6$ )  $\delta$  156.5, 152.4, 143.9, 137.9, 136.5, 130.0, 126.5, 124.4, 120.7, 119.2; LCMS-LTQ (ESI+) calcd for  $\text{C}_{10}\text{H}_{11}\text{N}_4^+$  [M+H] $^+$  187.22, found 186.90.

**1-(Quinolin-3-yl)guanidine hydrochloride (Table S3, 8r):** Purification by column chromatography (MeOH-DCM, 2:10 V/V) afforded **8r**; Yellow semisolid (yield 58%);  $^1\text{H}$  NMR (500 MHz, DMSO- $d_6$ ):  $\delta$  9.13 (s, 1H), 8.24 (s, 1H), 8.12 (d,  $J = 8.2$  Hz, 1H), 7.93 (d,  $J = 8.4$  Hz, 4H), 7.78 (t,  $J = 7.5$  Hz, 1H), 7.67 (t,  $J = 7.4$  Hz, 1H), 5.43 (s, 1H);  $^{13}\text{C}$  NMR {1H} (125 MHz, DMSO- $d_6$ ):  $\delta$  157.7, 150.0, 140.3, 132.8, 131.3, 131.0, 129.3, 128.1, 122.6; LCMS-LTQ (ESI+) calcd for  $\text{C}_{10}\text{H}_{11}\text{N}_4^+$  [M+H] $^+$  187.22, found 186.88.

**1-(6,7-Dimethoxyquinolin-4-yl)guanidine hydrochloride (Table S3, 8s):** Purification by column chromatography (MeOH-DCM, 2:10 V/V) afforded **8s**; Yellow semisolid (yield 37%);  $^1\text{H}$  NMR (500 MHz, DMSO- $d_6$ ):  $\delta$  8.91 (s, 3H), 8.39 (d,  $J = 8.5$  Hz, 1H), 8.23 (d,  $J = 8.5$  Hz, 1H), 7.80 (s, 1H), 7.37 (s, 1H), 3.86 (s, 3H), 3.82 (s, 3H);  $^{13}\text{C}$  NMR {1H} (125 MHz, DMSO- $d_6$ ):  $\delta$  132.4, 131.8, 125.9, 125.6, 124.6, 123.8, 123.3, 56.4, 56.2; LCMS-LTQ (ESI+) calcd for  $\text{C}_{12}\text{H}_{15}\text{N}_4\text{O}_2^+$  [M+H] $^+$  247.27, found 247.95.

**1-(4-Hydroxy-8-methoxynaphthalen-1-yl)guanidine hydrochloride (Table S3, 8t):** Purification by column chromatography (MeOH-DCM, 1:10 V/V) afforded **8t**; Yellow semisolid (yield 32%);  $^1\text{H}$  NMR (500 MHz, DMSO- $d_6$ ):  $\delta$  10.25 (s, 1H), 8.25 (d,  $J = 9.2$  Hz, 1H), 7.92 (d,  $J = 9.2$  Hz, 1H), 7.57 (d,  $J = 8.5$  Hz, 1H), 7.44 (t,  $J = 8.1$  Hz, 1H), 6.90 (d,  $J = 7.5$  Hz, 1H), 4.90 (broad singlet, 3H [NH]), 3.96 (s, 3H);  $^{13}\text{C}$  NMR {1H} (125 MHz, DMSO- $d_6$ ):  $\delta$  159.6, 155.7, 144.8, 129.7, 129.1, 127.1, 122.7, 122.3, 117.6, 113.7, 56.0; LCMS-LTQ (ESI+) calcd for  $\text{C}_{12}\text{H}_{14}\text{N}_3\text{O}_2^+$  [M+H] $^+$  232.26, found 231.96.



**1-(4-Morpholinophenyl)guanidine hydrochloride (Table S2, 8u):** Purification by column chromatography (MeOH-DCM, 1:10 V/V) afforded **8u**; Pale yellow semisolid (yield 86%); <sup>1</sup>H NMR (500 MHz, DMSO-*d*<sub>6</sub>): δ 7.96 (broad singlet, 4H [NH]), 7.00 (d, *J* = 8.7 Hz, 2H), 6.92 (d, *J* = 8.9 Hz, 2H), 3.69 (t, *J* = 4.5 Hz, 4H), 3.05 (t, *J* = 4.5 Hz, 4H); <sup>13</sup>C NMR {1H} (125 MHz, DMSO-*d*<sub>6</sub>): δ 160.2, 157.3, 149.7, 126.1, 116.3, 66.5, 49.0; LCMS-LTQ (ESI+) calcd for C<sub>11</sub>H<sub>16</sub>N<sub>4</sub>O<sup>+</sup> [M+H]<sup>+</sup> 221.28, found: 220.94.

**1-(1-Methyl-2-oxo-1,2-dihydroquinolin-6-yl)guanidine hydrochloride (Table S3, 8v):** Purification by column chromatography (MeOH-DCM, 3:10 V/V) afforded **8v**; Yellow semisolid (yield 61%); <sup>1</sup>H NMR (500 MHz, DMSO-*d*<sub>6</sub>): δ 7.90 (s, 1H), 7.85 (d, *J* = 9.4 Hz, 1H), 7.54 (dd, *J* = 21.0, 8.4 Hz, 2H), 6.90 (broad singlet, 3H [NH]), 6.60 (d, *J* = 9.5 Hz, 1H), 3.57 (s, 3H); <sup>13</sup>C NMR {1H} (125 MHz, DMSO-*d*<sub>6</sub>): δ 167.8, 161.4, 136.7, 131.1, 127.0, 126.7, 122.2, 29.6; LCMS-LTQ (ESI+) calcd for C<sub>11</sub>H<sub>13</sub>N<sub>4</sub>O<sup>+</sup> [M+H]<sup>+</sup> 217.25, found 216.93.

**1-(4-Oxo-4H-pyrido[1,2-*a*]pyrimidin-3-yl)guanidine hydrochloride (Table S3, 8w):** Purification by column chromatography (MeOH-DCM, 3:10 V/V) afforded **8w**; Yellow semisolid (yield 26%); <sup>1</sup>H NMR (500 MHz, DMSO-*d*<sub>6</sub>): δ 8.54 (s, 1H), 7.96 (d, *J* = 14.4 Hz, 1H), 7.91 (d, *J* = 10.9 Hz, 2H), 7.04 (s, 2H), 6.79 (broad singlet, 3H [NH]); <sup>13</sup>C NMR {1H} (125 MHz, DMSO-*d*<sub>6</sub>): δ 164.5, 145.4, 137.5, 131.6, 127.5, 126.7, 120.2, 114.8; LCMS-LTQ (ESI+) calcd for C<sub>9</sub>H<sub>9</sub>N<sub>5</sub>O<sup>+</sup> [M+H]<sup>+</sup> 204.21, found 203.88.

**1-(Quinoxalin-6-yl)guanidine hydrochloride (Table S2, 8x):** Purification by column chromatography (MeOH-DCM, 2:10 V/V) afforded **8x**; Red semisolid (yield 69%); <sup>1</sup>H NMR (500 MHz, DMSO-*d*<sub>6</sub>): δ 8.90 (d, *J* = 1.5 Hz, 1H), 8.85 (d, *J* = 1.6 Hz, 1H), 8.26 (s, 1H), 8.06 (d, *J* = 9.0 Hz, 1H), 7.76 (dd, *J* = 9.0, 2.3 Hz, 1H), 6.90 (broad singlet, 3H [NH]); <sup>13</sup>C NMR {1H} (125 MHz, DMSO-*d*<sub>6</sub>): δ 168.9, 157.8, 134.6, 128.3, 127.4, 127.2, 126.5, 122.7; LCMS-LTQ (ESI+) calcd for C<sub>9</sub>H<sub>10</sub>N<sub>5</sub><sup>+</sup> [M+H]<sup>+</sup> 188.21, found 187.93.

**1-(Quinolin-2-yl)guanidine hydrochloride (Table S3, 8y):** Purification by column chromatography (MeOH-DCM, 2:10 V/V) afforded **8y**; White semisolid (yield 64%); <sup>1</sup>H NMR (500 MHz, DMSO-*d*<sub>6</sub>): δ 8.35 (d, *J* = 8.9 Hz, 1H), 7.97 (s, 1H), 7.95 (d, *J* = 8.5 Hz, 1H), 7.89 (d, *J* = 8.0 Hz, 1H), 7.79 (s, 1H), 7.74 (t, *J* = 7.6 Hz, 1H), 7.50 (t, *J* = 7.3 Hz, 1H), 7.32 (d, *J* = 8.8 Hz, 1H), 5.63 (broad singlet, 3H [NH]); <sup>13</sup>C NMR {1H} (125 MHz, DMSO-*d*<sub>6</sub>): δ 169.1, 156.4, 152.5,

131.1, 130.7, 127.7, 126.2, 125.3; LCMS-LTQ (ESI+) calcd for  $C_{10}H_{11}N_4^+$   $[M+H]^+$  187.21, found 186.93.

**1-(2-Methoxy-7-methyl-7H-pyrrolo[2,3-d]pyrimidin-4-yl)guanidine hydrochloride (Table S3, 8z):** Purification by column chromatography (MeOH-DCM, 1:10 V/V) afforded **8z**; Yellow semisolid (yield 21%);  $^1H$  NMR (500 MHz, DMSO- $d_6$ ):  $\delta$  7.47 (d,  $J$  = 3.4 Hz, 1H), 6.71 (d,  $J$  = 3.5 Hz, 1H), 5.87 (broad singlet, 3H [NH]), 3.81 (s, 3H), 2.44 (s, 3H);  $^{13}C$  NMR {1H} (125 MHz, DMSO- $d_6$ ):  $\delta$  161.2, 145.3, 138.3, 124.4, 106.6, 102.5, 43.9, 32.1; LCMS-LTQ (ESI+) calcd for  $C_{12}H_{15}N_4O^+$   $[M+H]^+$  221.24, found 220.91.

**1-(Quinolin-4-yl)guanidine hydrochloride (Table S3, 8za):** Purification by column chromatography (MeOH-DCM, 2:10 V/V) afforded **8aa**; Yellow semisolid (yield 39%);  $^1H$  NMR (500 MHz, DMSO- $d_6$ ):  $\delta$  8.73 (d,  $J$  = 5.1 Hz, 1H), 8.39 (d,  $J$  = 8.4 Hz, 1H), 8.20 (d,  $J$  = 5.0 Hz, 1H), 7.93 (d,  $J$  = 8.3 Hz, 1H), 7.68 (t,  $J$  = 7.5 Hz, 1H), 7.52 (t,  $J$  = 7.6 Hz, 1H), 6.79 (broad singlet, 3H [NH]);  $^{13}C$  NMR {1H} (125 MHz, DMSO- $d_6$ ):  $\delta$  159.3, 151.0, 149.2, 143.5, 129.7, 129.6, 125.8, 123.3, 121.6; LCMS-LTQ (ESI+) calcd for  $C_{10}H_{11}N_4^+$   $[M+H]^+$  187.21, found 186.97.

**1-(3-Acetyl-1-methyl-1H-indol-5-yl)guanidine hydrochloride (Table S3, 8zb):** Purification by column chromatography (MeOH-DCM, 3:10 V/V) afforded **8bb**; Red semisolid (yield 34%);  $^1H$  NMR (500 MHz, DMSO- $d_6$ ):  $\delta$  8.40 (s, 1H), 8.04 (s, 1H), 7.91 (s, 1H), 7.56 (d,  $J$  = 7.7 Hz, 1H), 7.21 (d,  $J$  = 5.8 Hz, 1H), 6.90 (broad singlet, 3H [NH]), 3.84 (s, 3H), 2.37 (s, 3H);  $^{13}C$  NMR {1H} (125 MHz, DMSO- $d_6$ ):  $\delta$  192.6, 139.5, 137.4, 136.1, 131.1, 127.0, 126.4, 116.1, 111.9, 33.8, 27.7; LCMS-LTQ (ESI+) calcd for  $C_{12}H_{15}N_4O^+$   $[M+H]^+$  231.26, found 230.93.

### 3 $^1\text{H}$ -NMR and $^{13}\text{C}$ -NMR spectra of final compounds (10a-z):

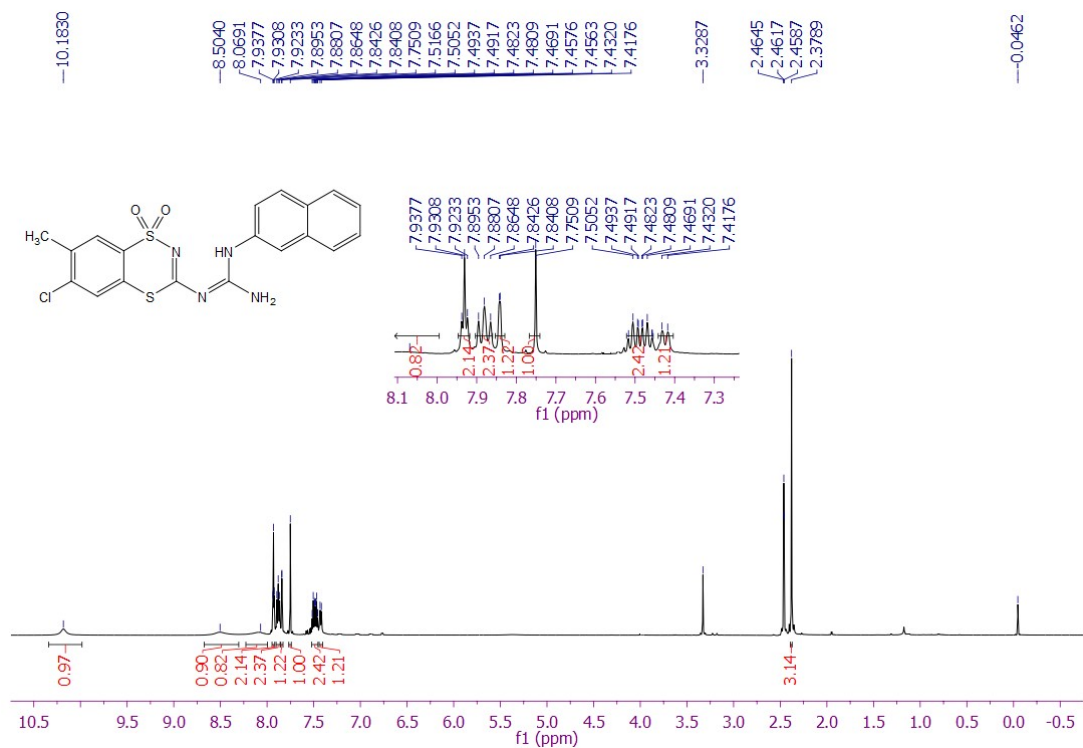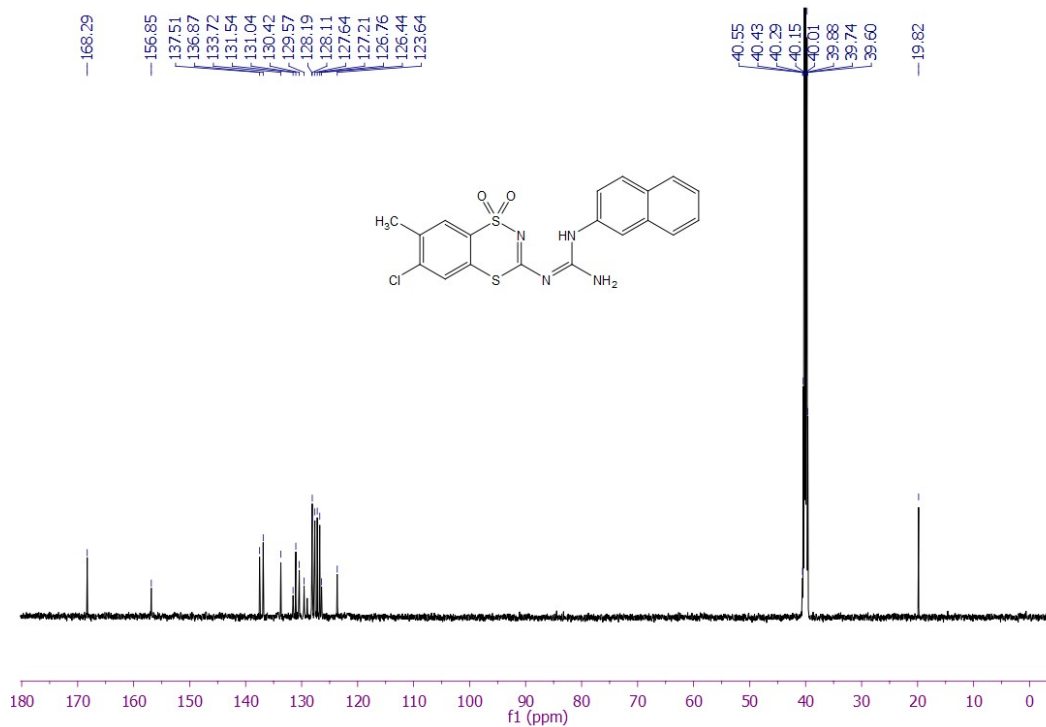

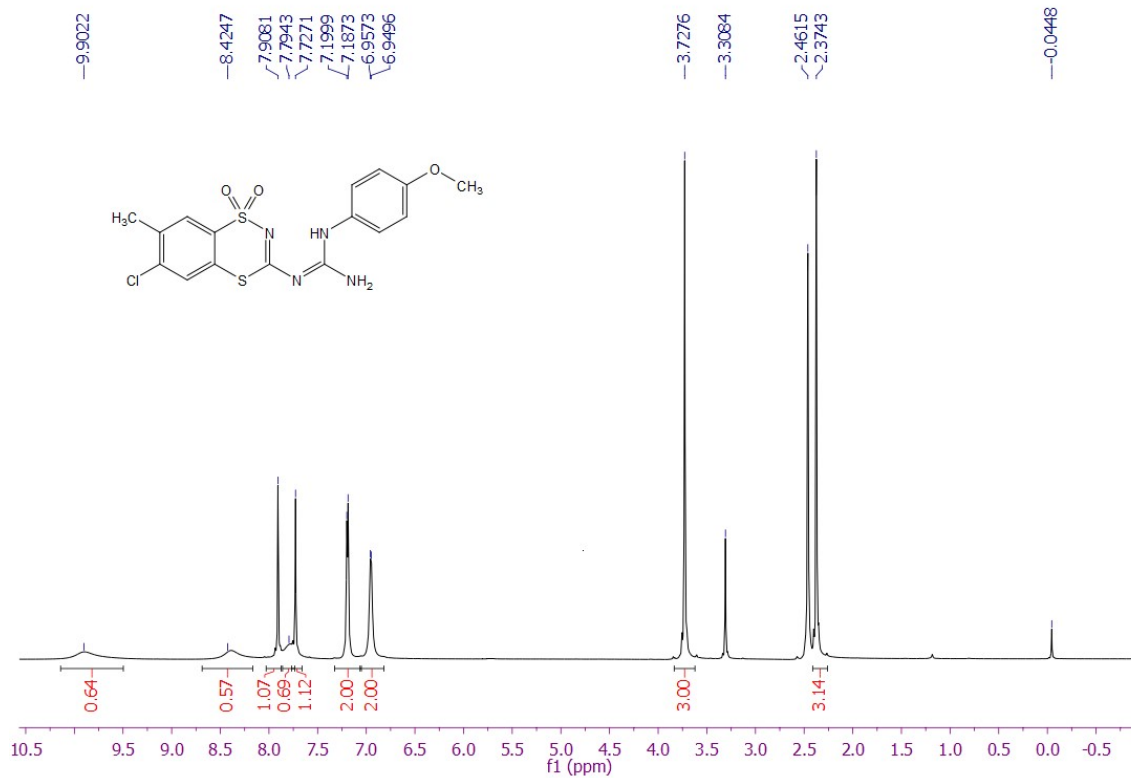

**Figure S4.** <sup>1</sup>H NMR spectrum of **10b** (600 MHz, DMSO-*d*<sub>6</sub>)

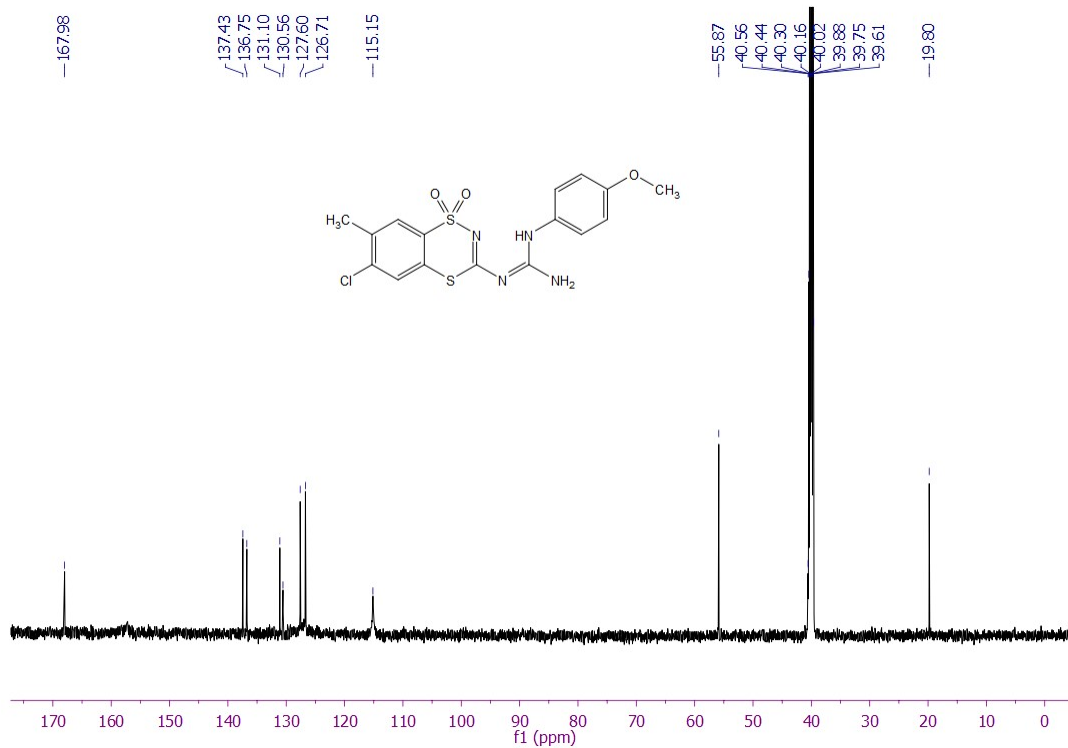

**Figure S5.** <sup>13</sup>C NMR spectrum of **10b** (151 MHz, DMSO-*d*<sub>6</sub>)

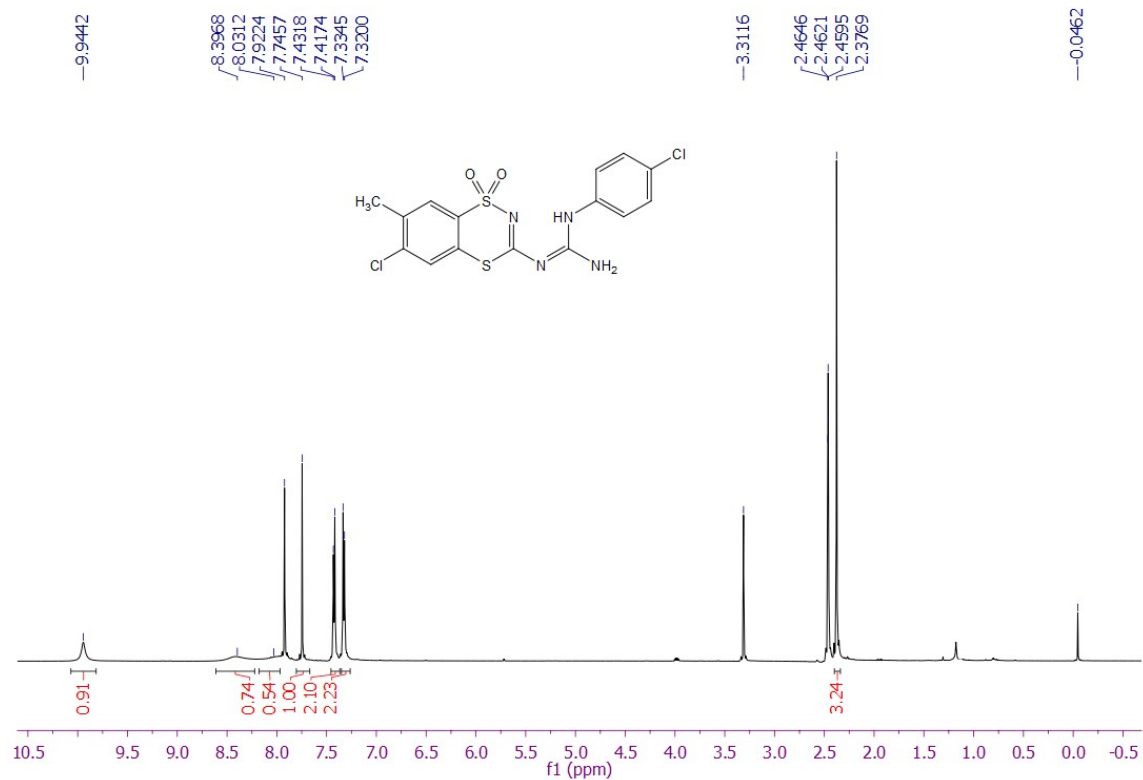

Figure S6. <sup>1</sup>H NMR spectrum of 10c (600 MHz, DMSO-*d*<sub>6</sub>)

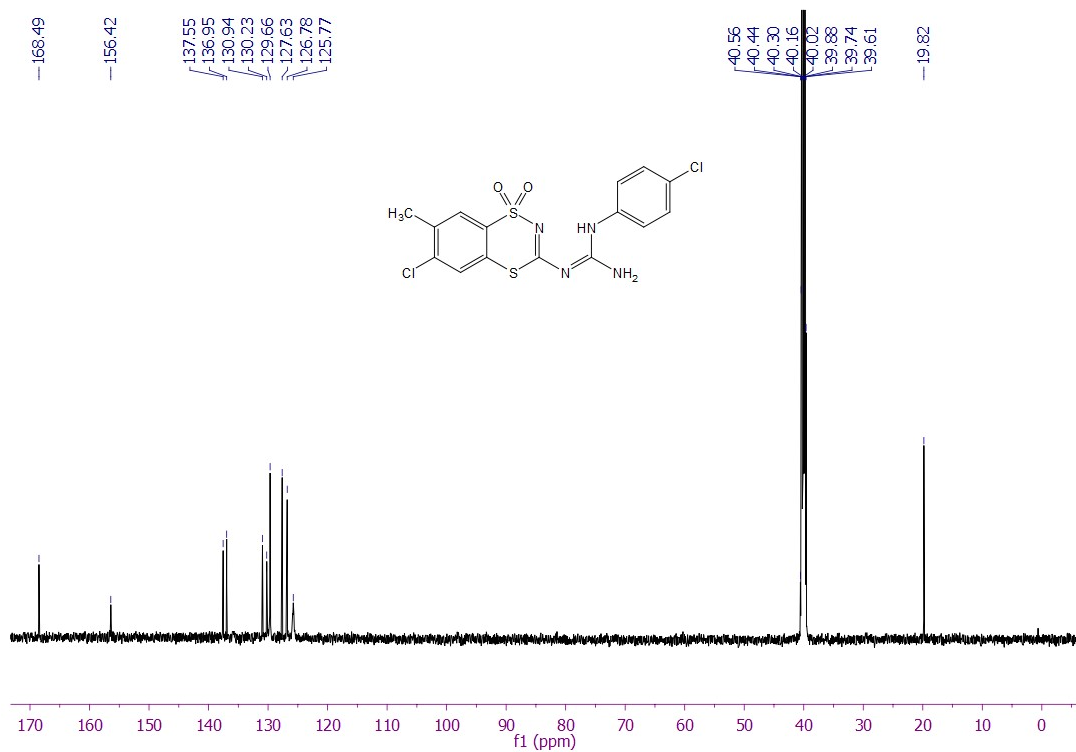

Figure S7. <sup>13</sup>C NMR spectrum of 10c (151 MHz, DMSO-*d*<sub>6</sub>)

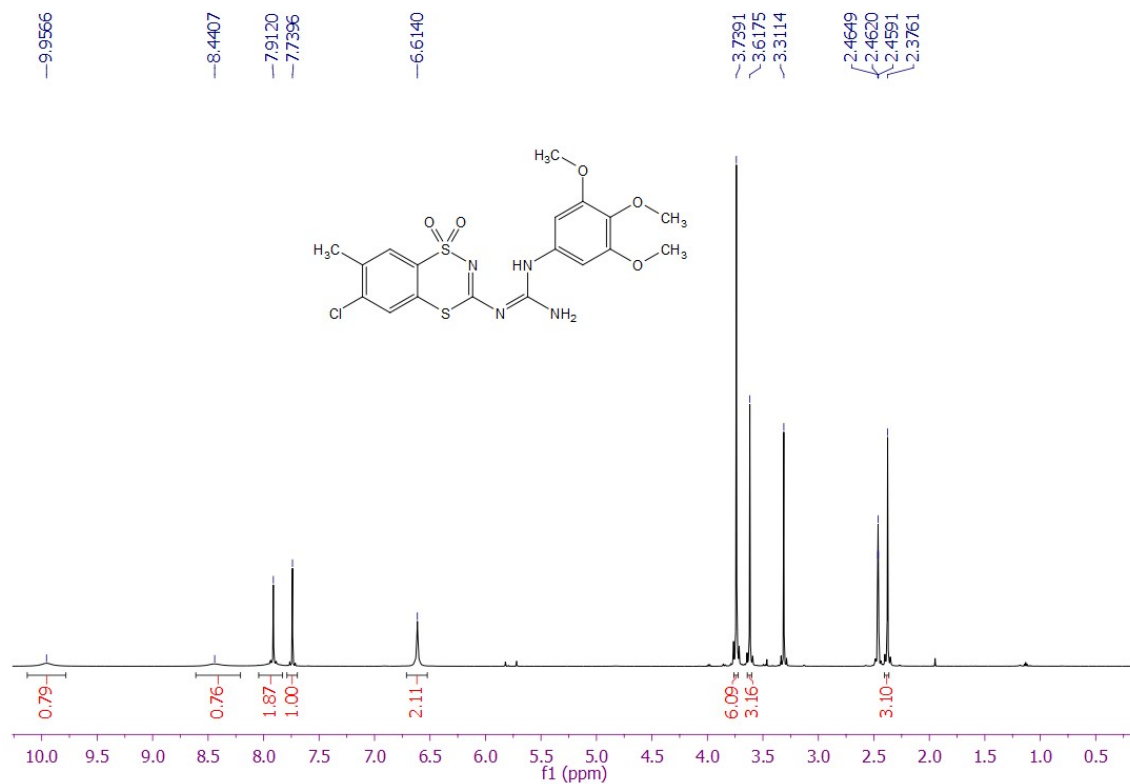

**Figure S8.** <sup>1</sup>H NMR spectrum of **10d** (600 MHz, DMSO-*d*<sub>6</sub>)

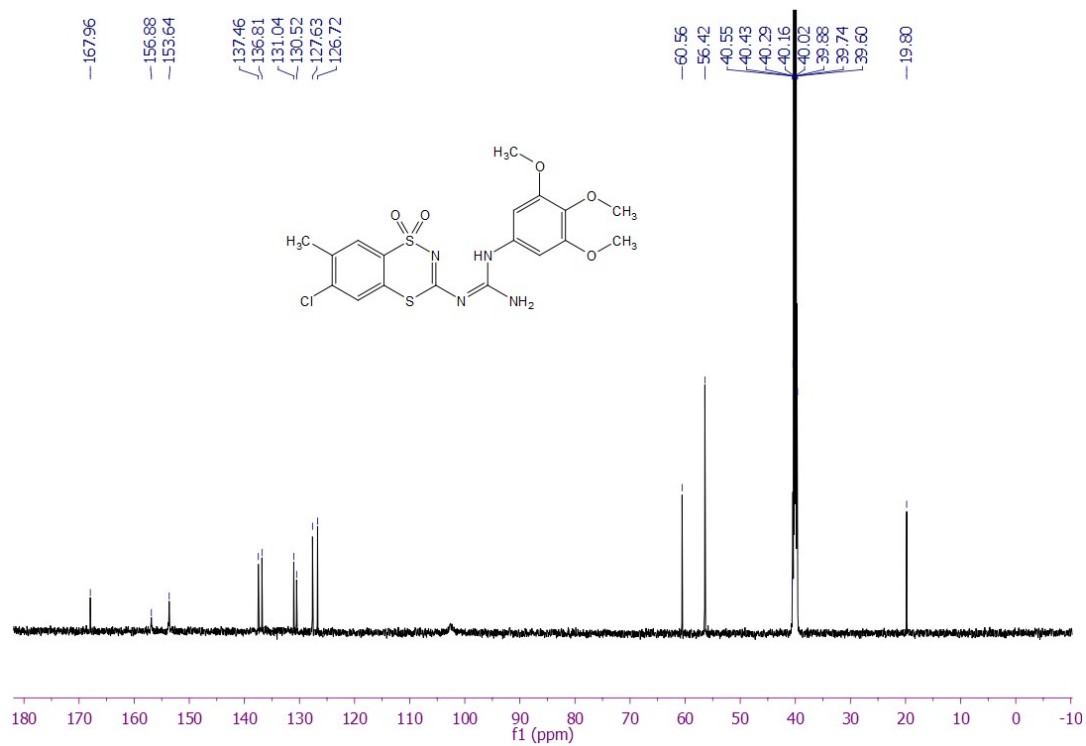

**Figure S9.** <sup>13</sup>C NMR spectrum of **10d** (151 MHz, DMSO-*d*<sub>6</sub>)

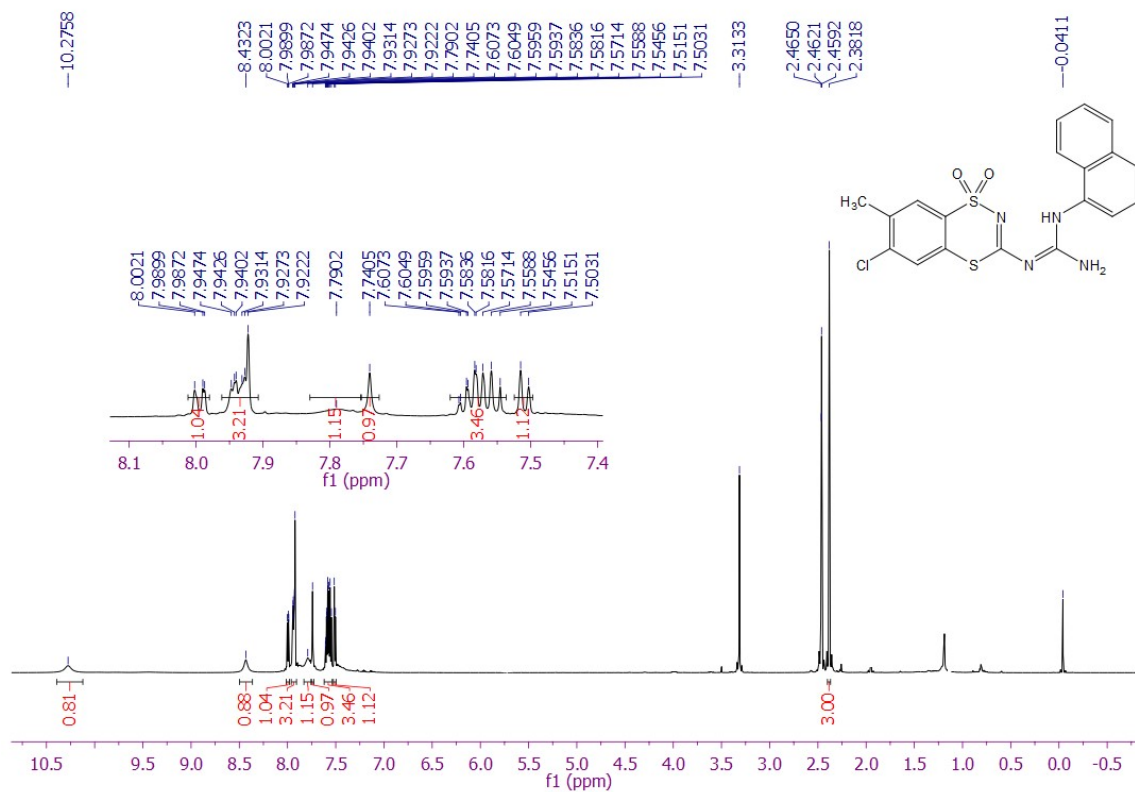

**Figure S10.** <sup>1</sup>H NMR spectrum of 10e (600 MHz, DMSO-*d*<sub>6</sub>)

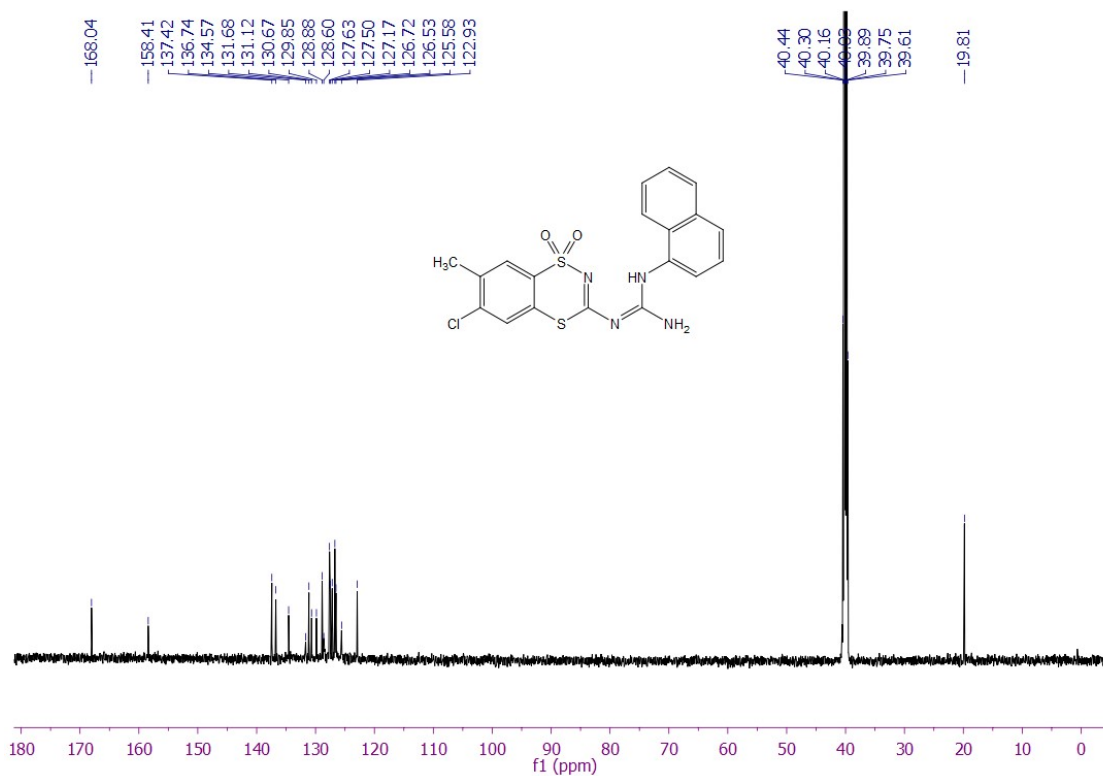

**Figure S11.** <sup>13</sup>C NMR spectrum of 10e (151 MHz, DMSO-*d*<sub>6</sub>)

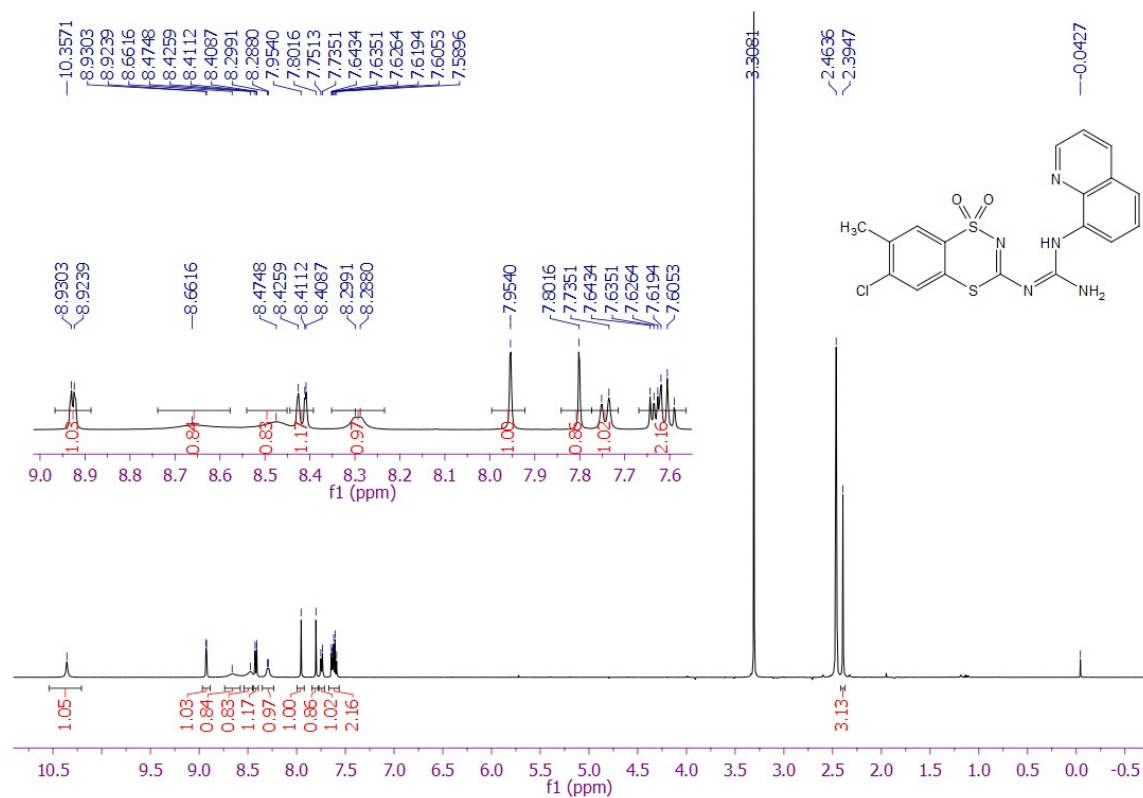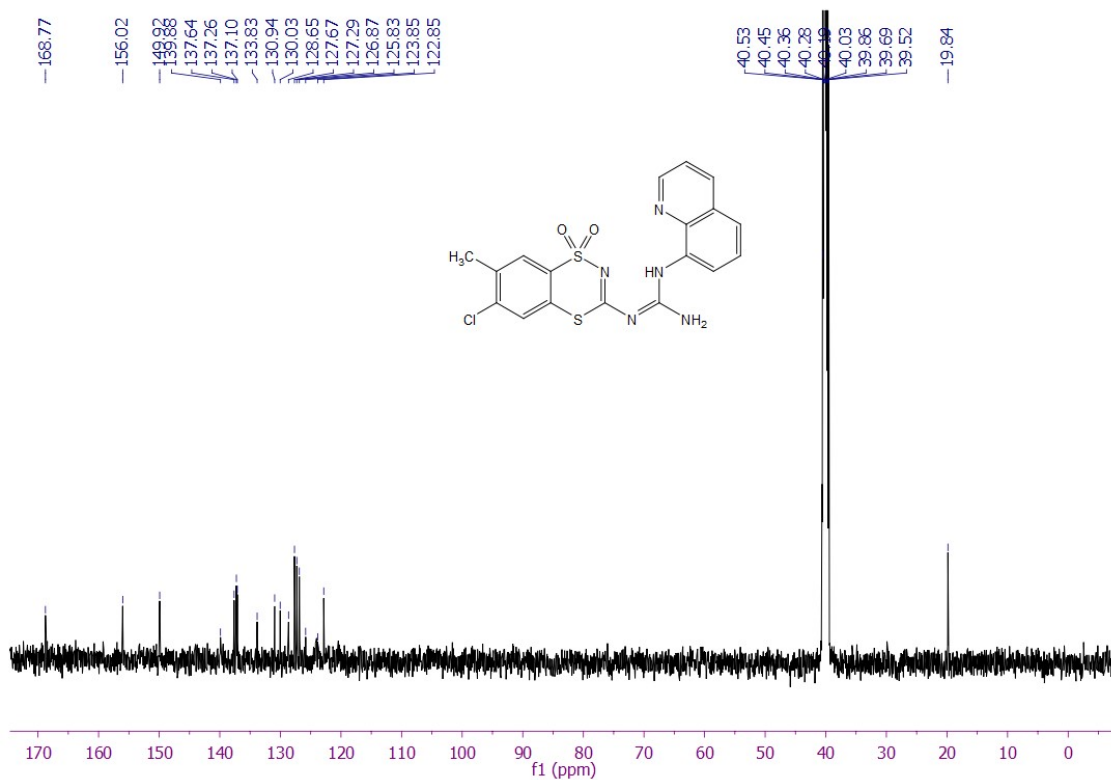

**Figure S13. <sup>13</sup>C NMR spectrum of 10f (151 MHz, DMSO-*d*<sub>6</sub>)**



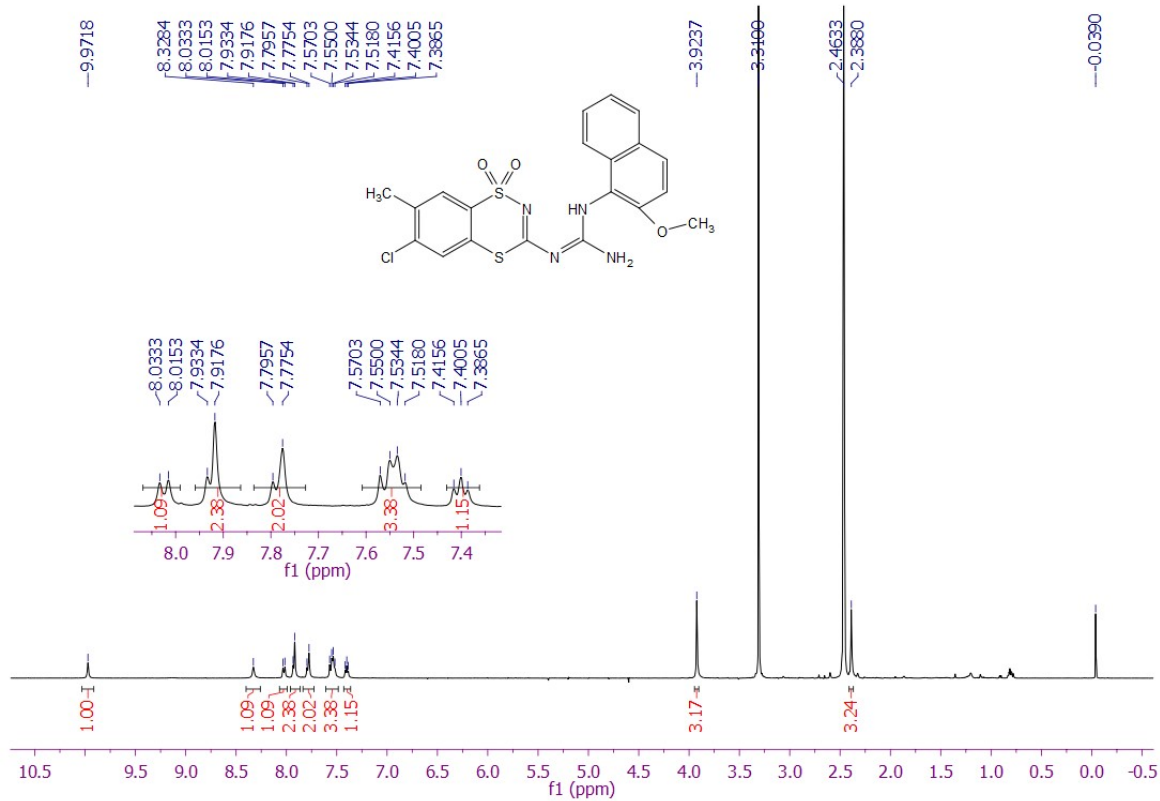

**Figure S14.** <sup>1</sup>H NMR spectrum of **10g** (600 MHz, DMSO-*d*<sub>6</sub>)

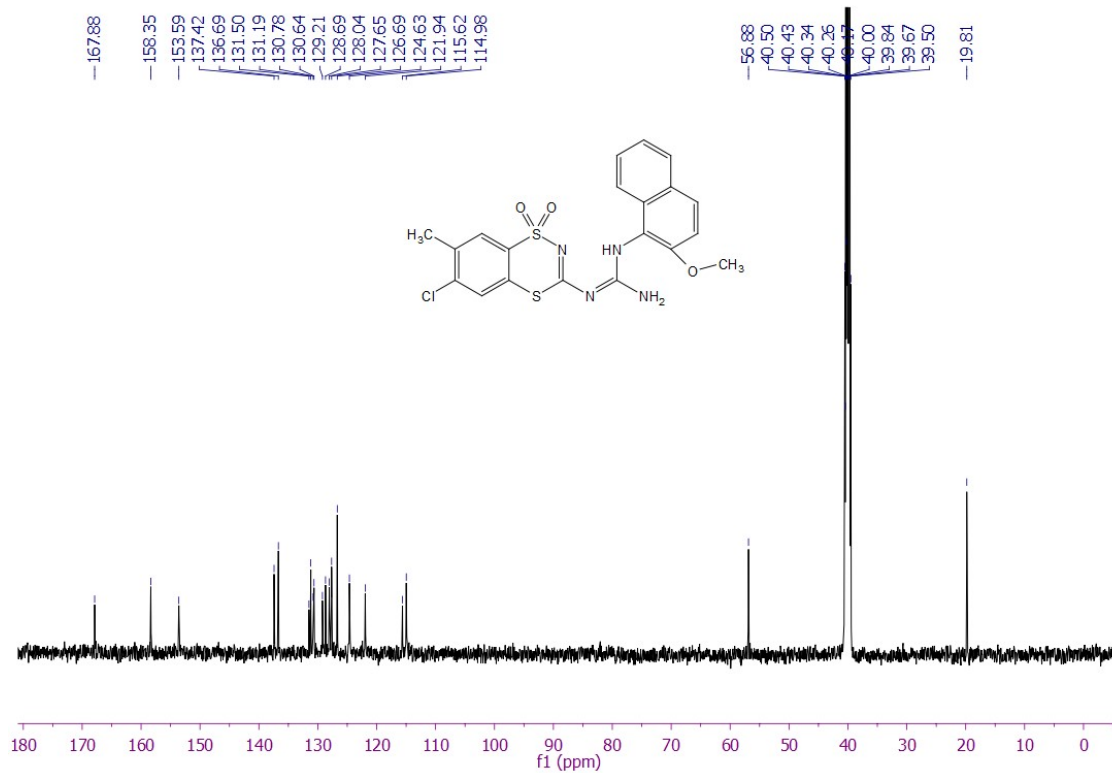

**Figure S15.** <sup>13</sup>C NMR spectrum of **10g** (151 MHz, DMSO-*d*<sub>6</sub>)

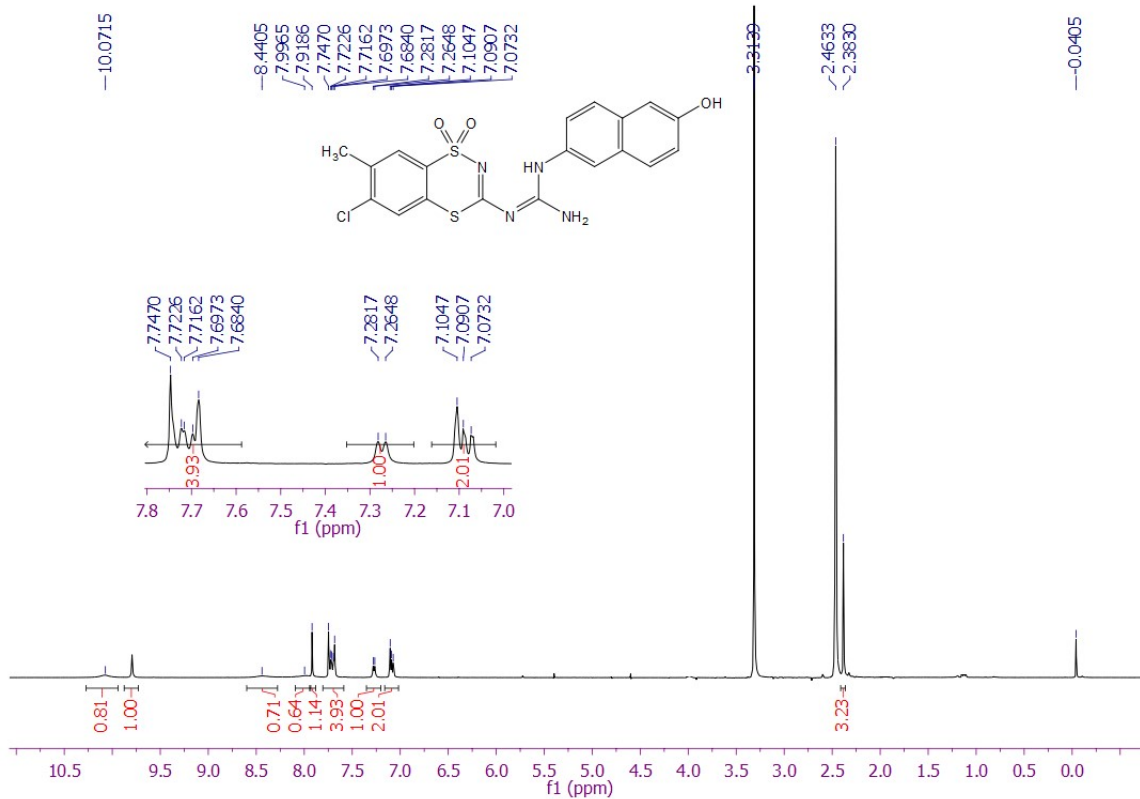

**Figure S16.** <sup>1</sup>H NMR spectrum of 10h (600 MHz, DMSO-*d*<sub>6</sub>)

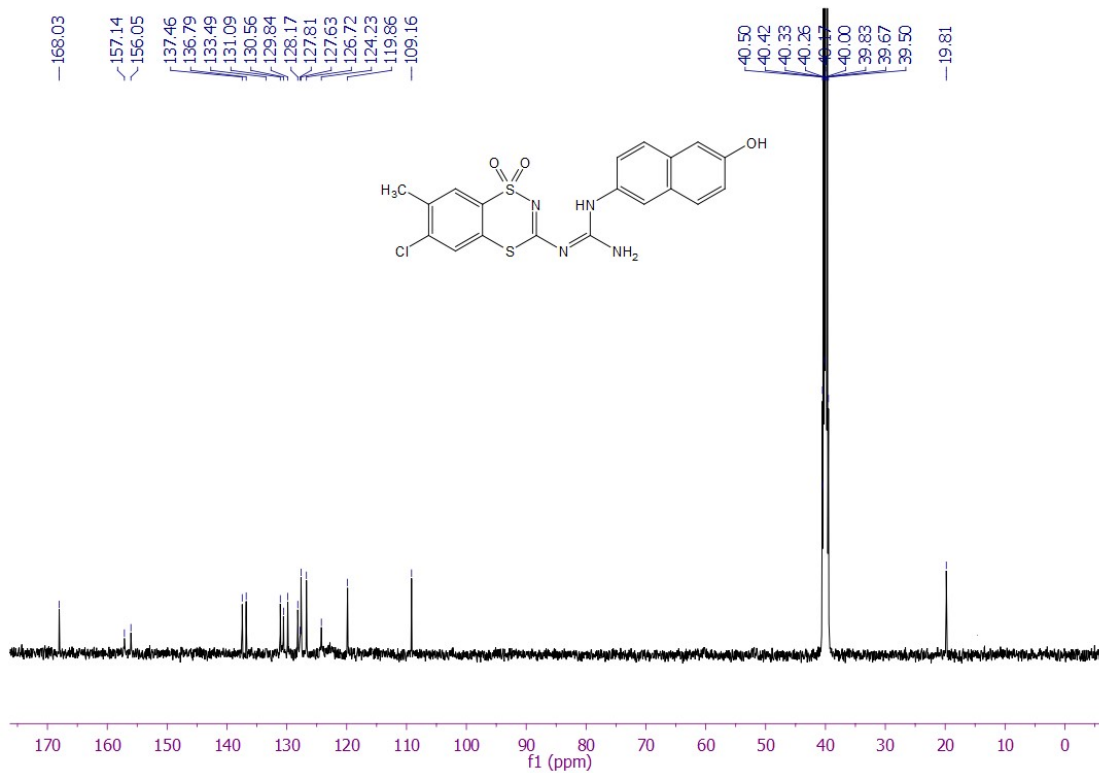

**Figure S17.** <sup>13</sup>C NMR spectrum of 10h (151 MHz, DMSO-*d*<sub>6</sub>)

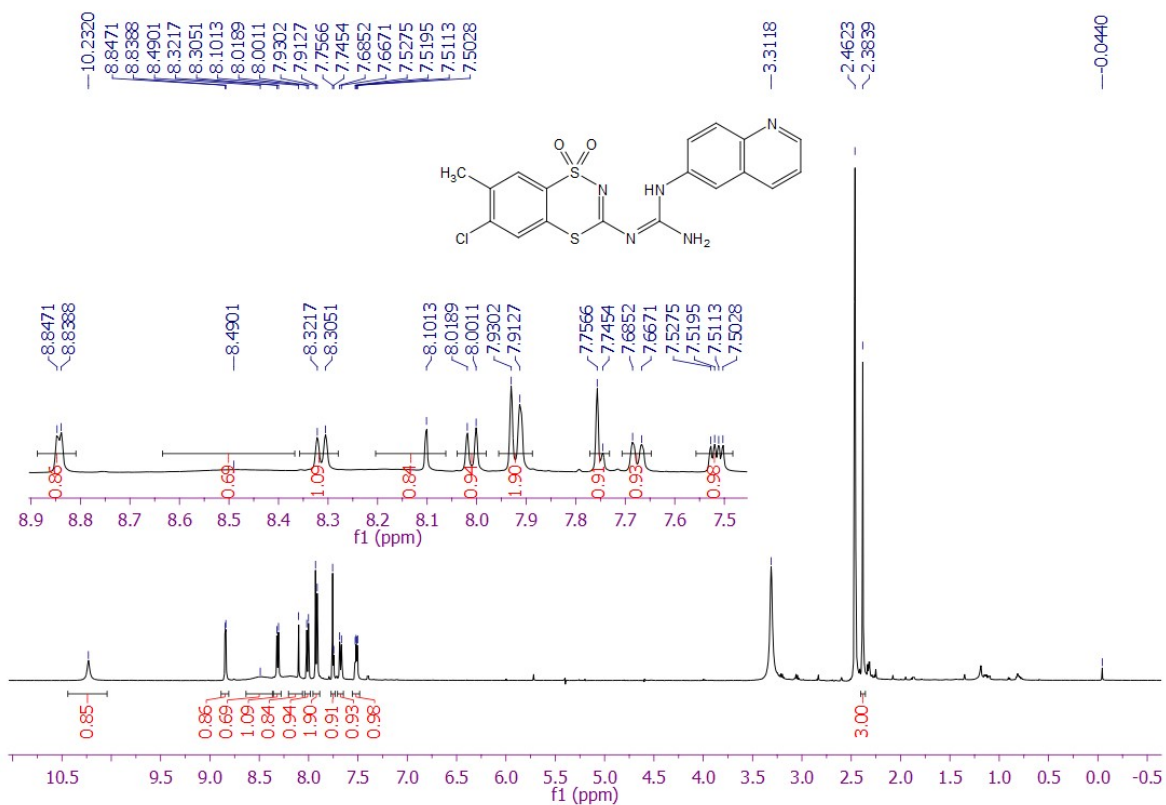

**Figure S18.** <sup>1</sup>H NMR spectrum of **10i** (600 MHz, DMSO-*d*<sub>6</sub>)

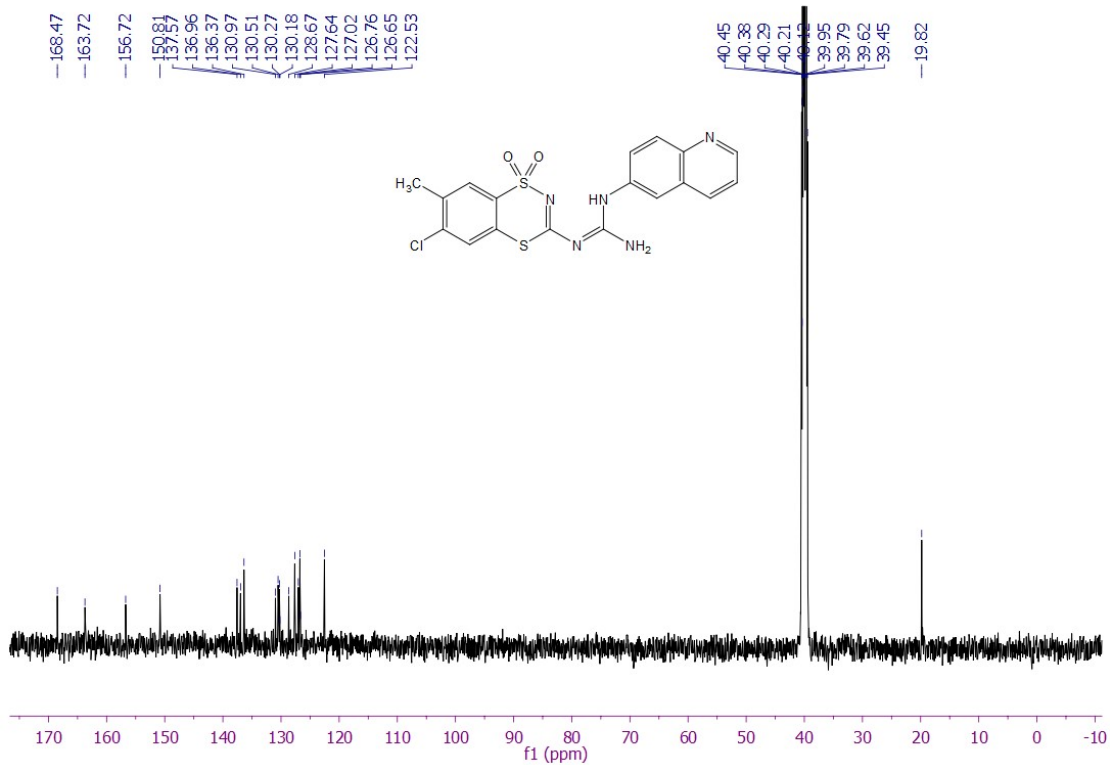

**Figure S19.** <sup>13</sup>C NMR spectrum of **10i** (151 MHz, DMSO-*d*<sub>6</sub>)

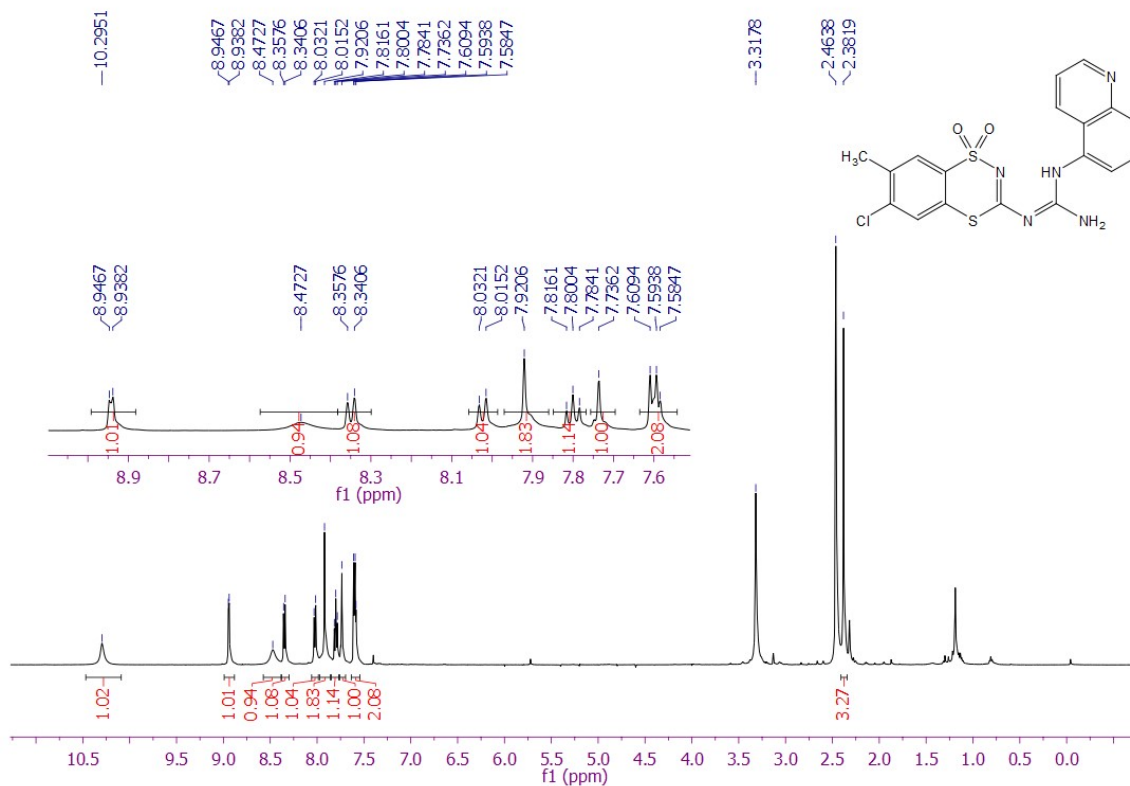

**Figure S20.** <sup>1</sup>H NMR spectrum of **10j** (600 MHz, DMSO-*d*<sub>6</sub>)

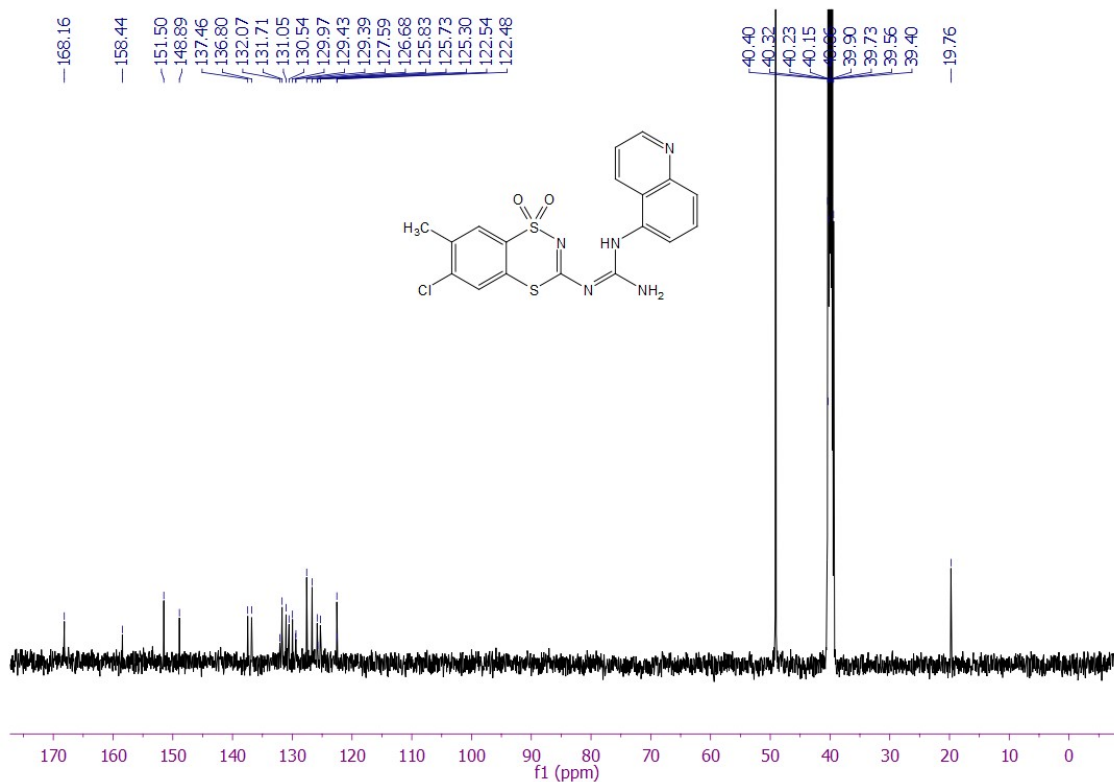

**Figure S21.** <sup>13</sup>C NMR spectrum of **10j** (151 MHz, DMSO-*d*<sub>6</sub>)

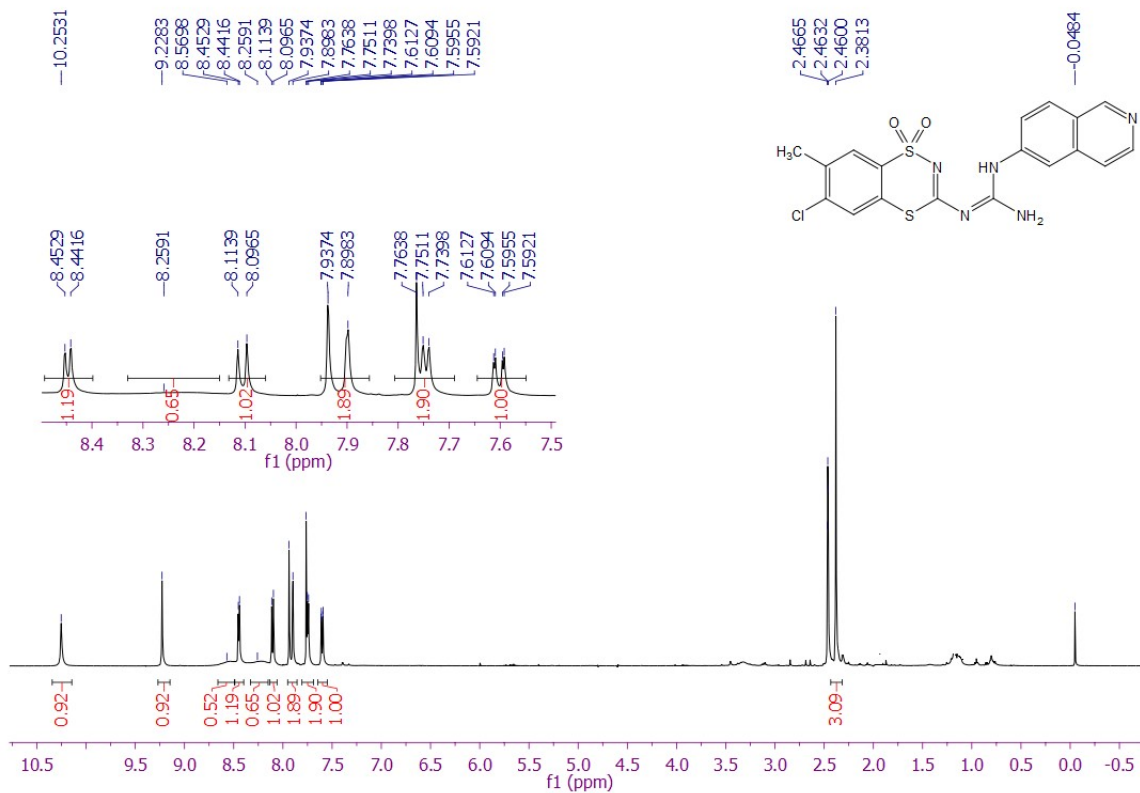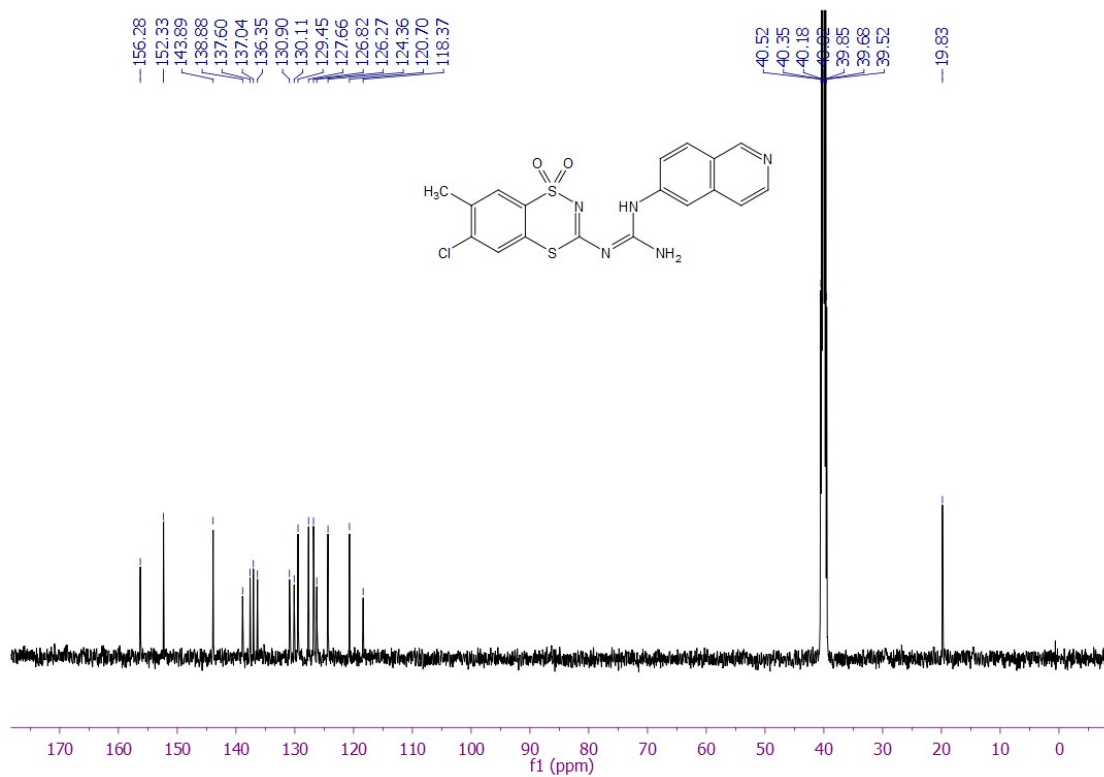

**Figure S23.**  $^{13}\text{C}$  NMR spectrum of **10k** (151 MHz,  $\text{DMSO-}d_6$ )

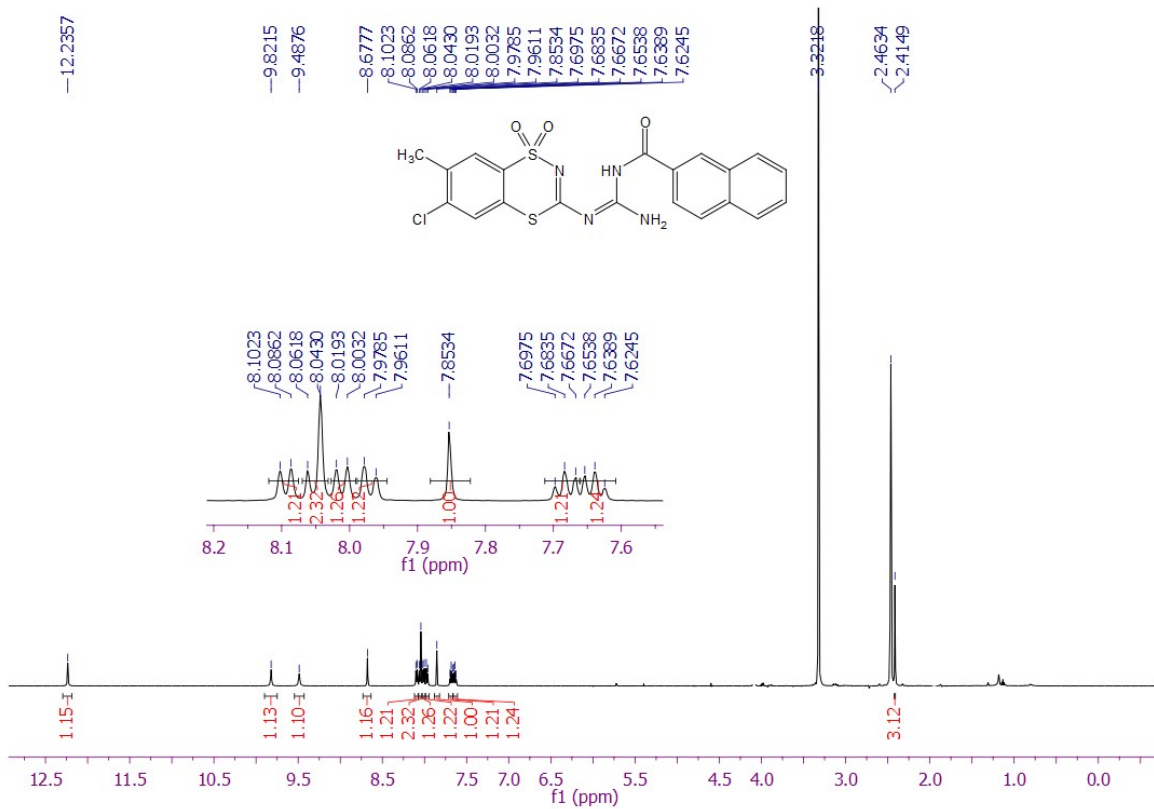

Figure S24. <sup>1</sup>H NMR spectrum of 101 (600 MHz, DMSO-*d*<sub>6</sub>)

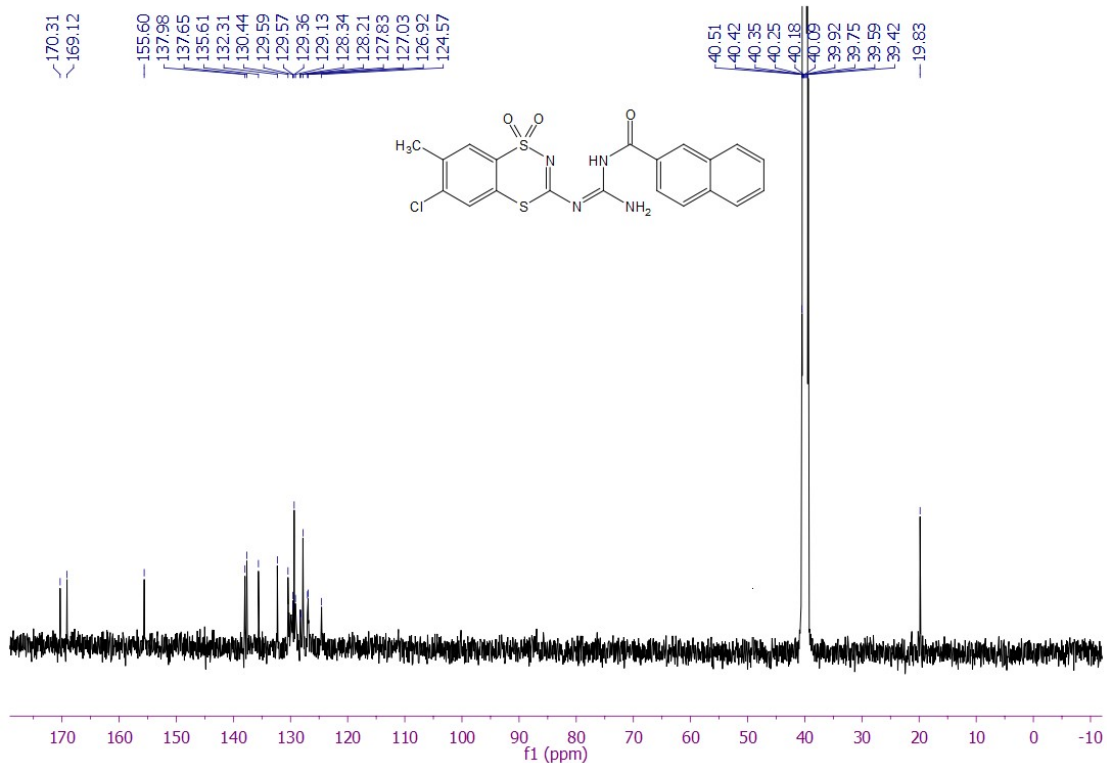

Figure S25. <sup>13</sup>C NMR spectrum of 101 (151 MHz, DMSO-*d*<sub>6</sub>)

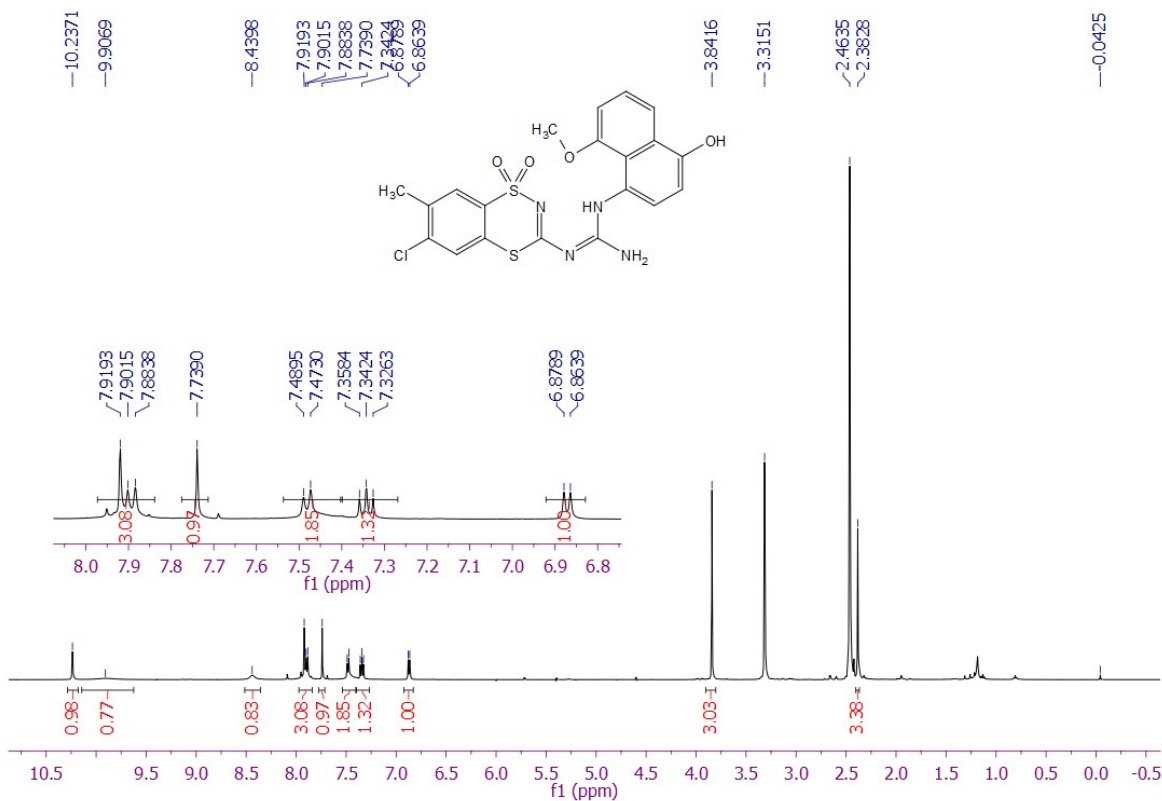

**Figure S26.** <sup>1</sup>H NMR spectrum of **10m** (600 MHz, DMSO-*d*<sub>6</sub>)

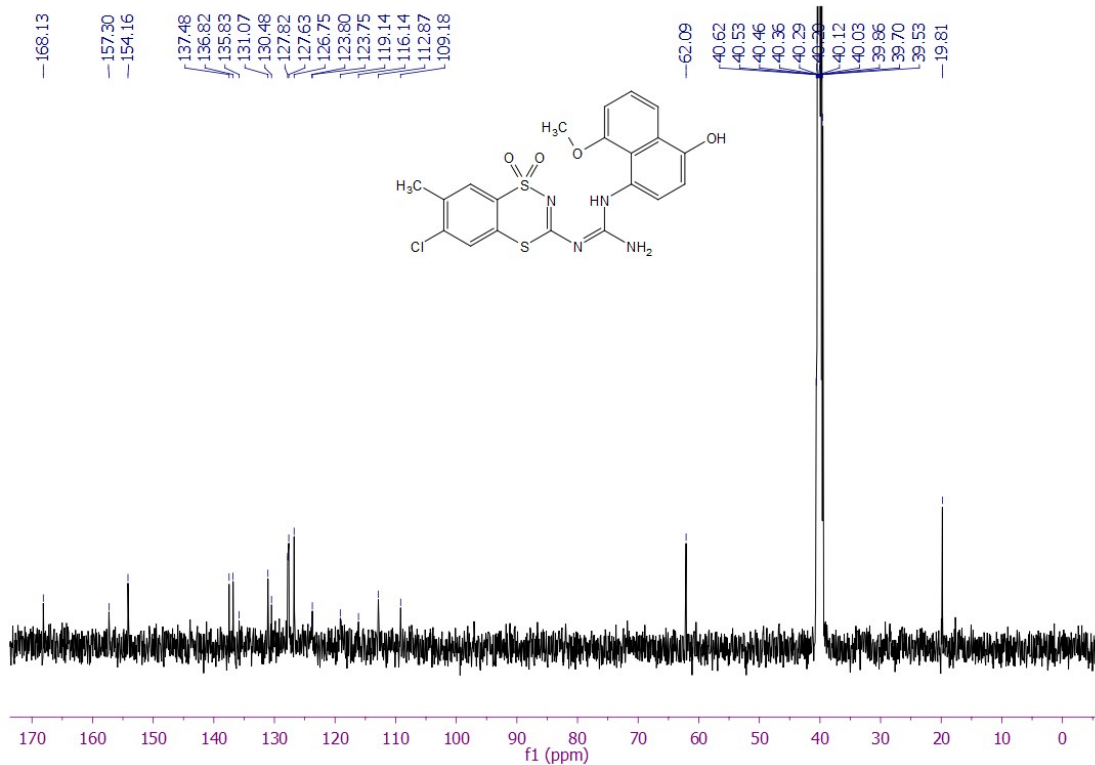

**Figure S27.** <sup>13</sup>C NMR spectrum of **10m** (151 MHz, DMSO-*d*<sub>6</sub>)

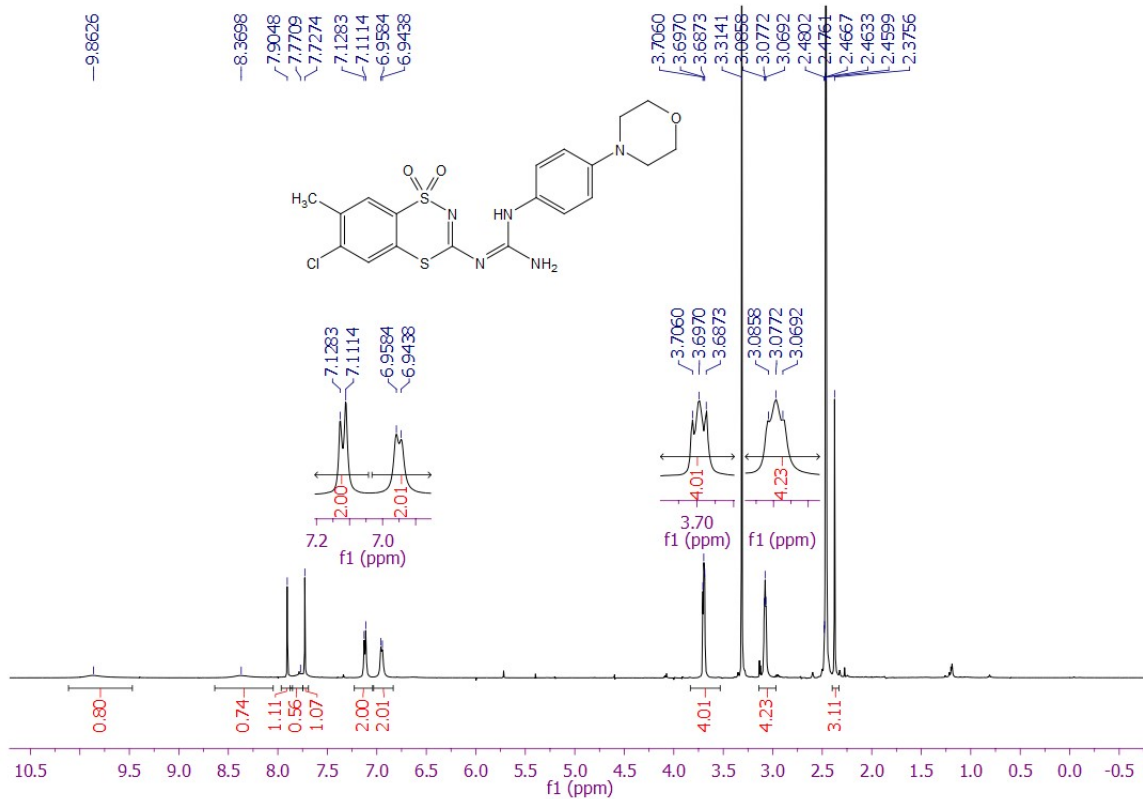

**Figure S28.** <sup>1</sup>H NMR spectrum of **10n** (600 MHz, DMSO-*d*<sub>6</sub>)

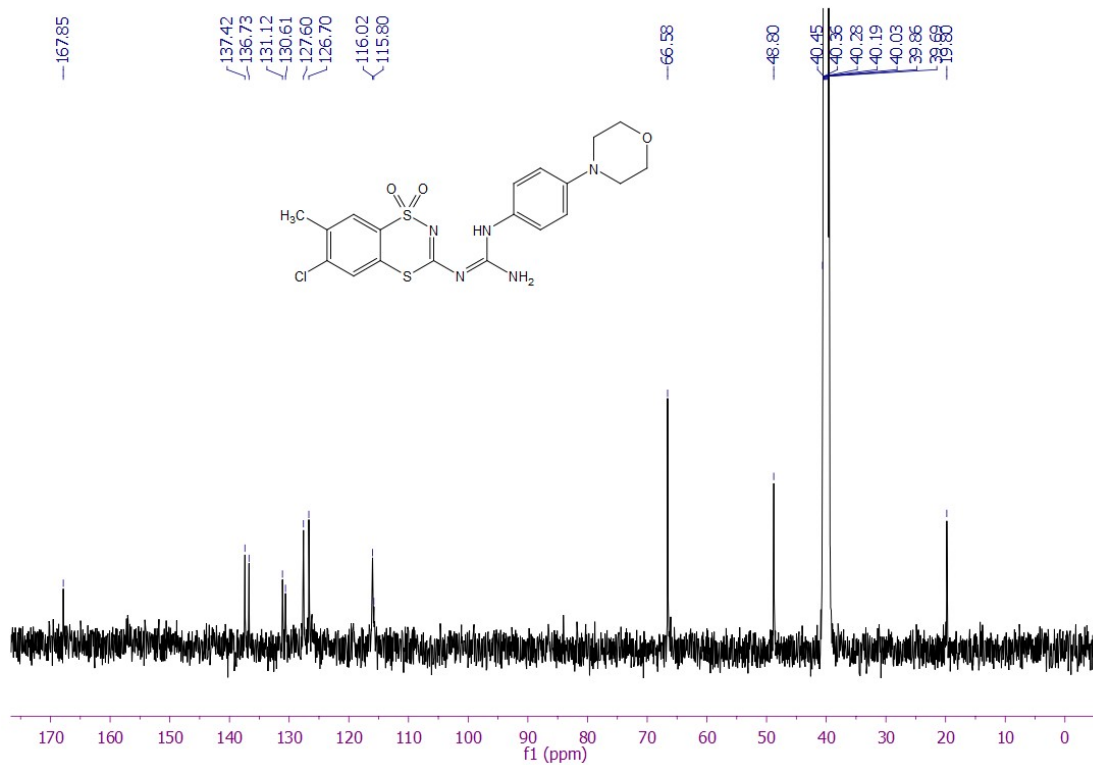

**Figure S29.** <sup>13</sup>C NMR spectrum of **10n** (151 MHz, DMSO-*d*<sub>6</sub>)



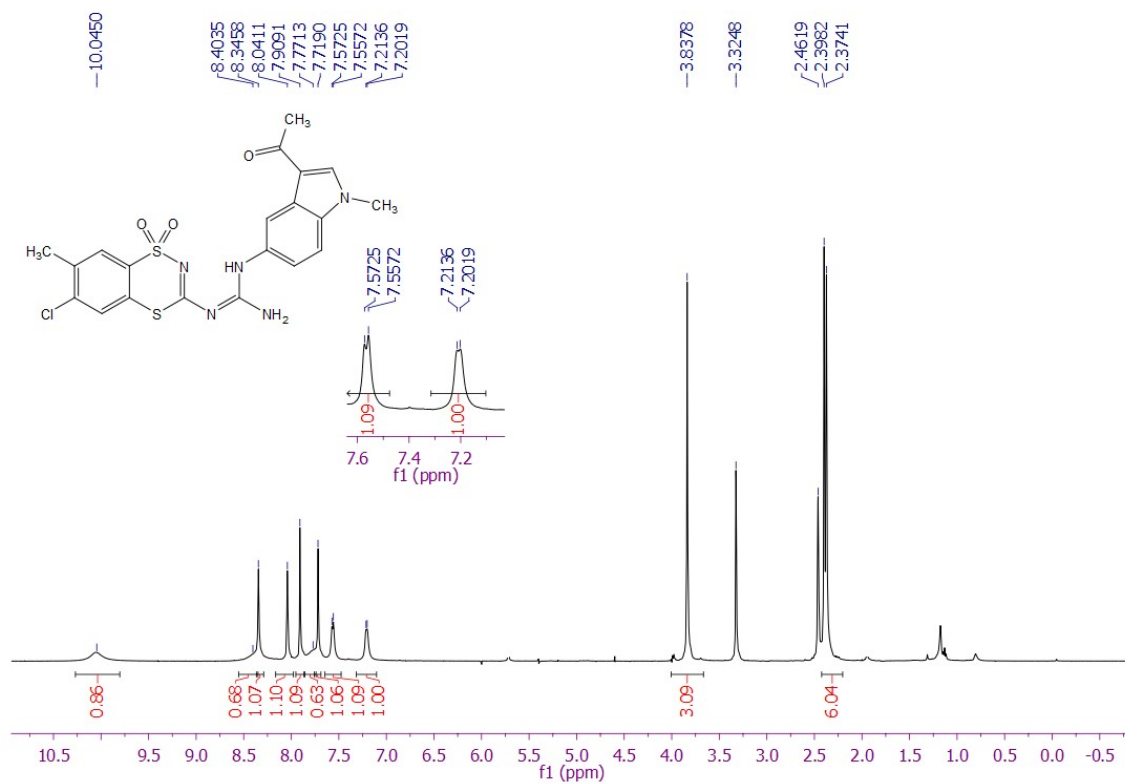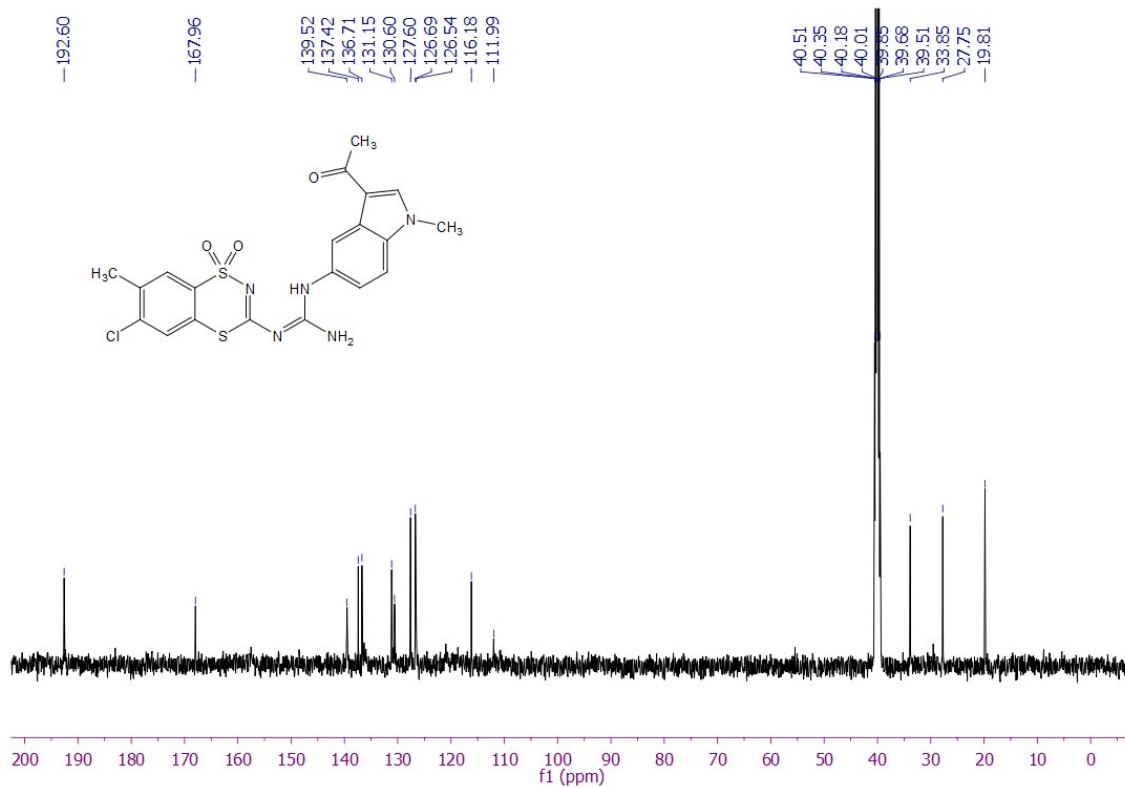

**Figure S31.**  $^{13}\text{C}$  NMR spectrum of **10o** (151 MHz,  $\text{DMSO}-d_6$ )

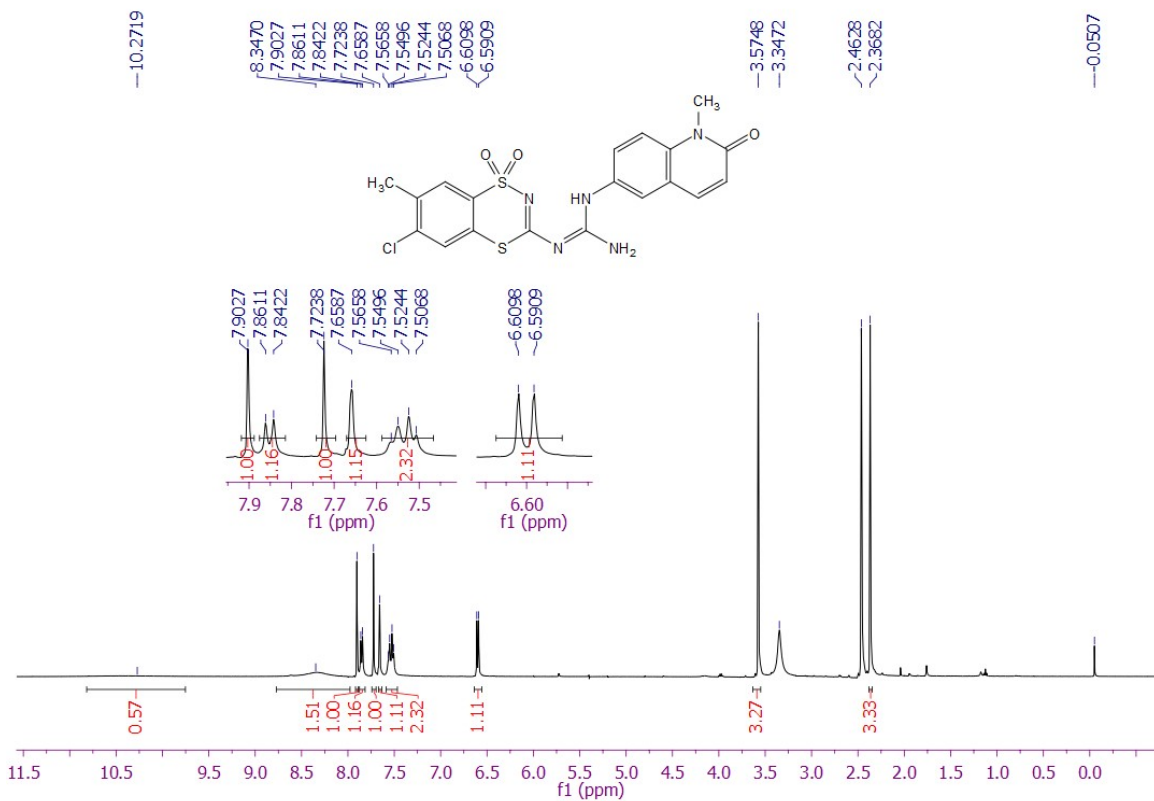

Figure S32. <sup>1</sup>H NMR spectrum of 10p (600 MHz, DMSO-*d*<sub>6</sub>)

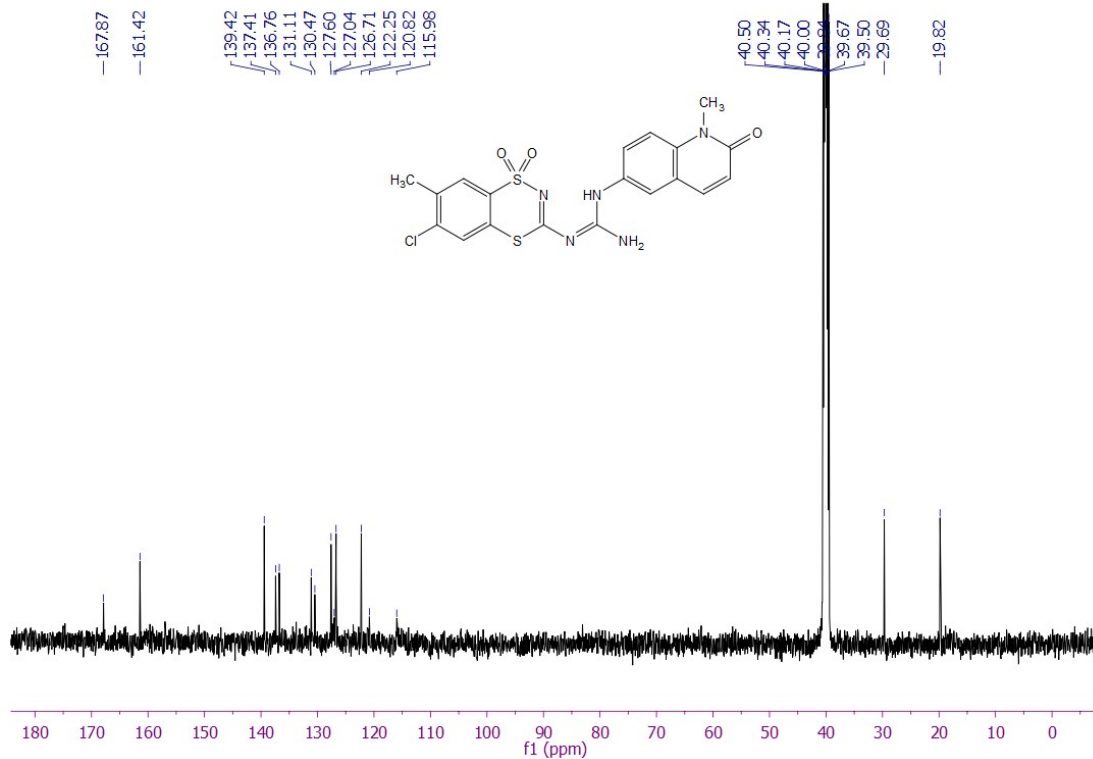

Figure S33. <sup>13</sup>C NMR spectrum of 10p (151 MHz, DMSO-*d*<sub>6</sub>)

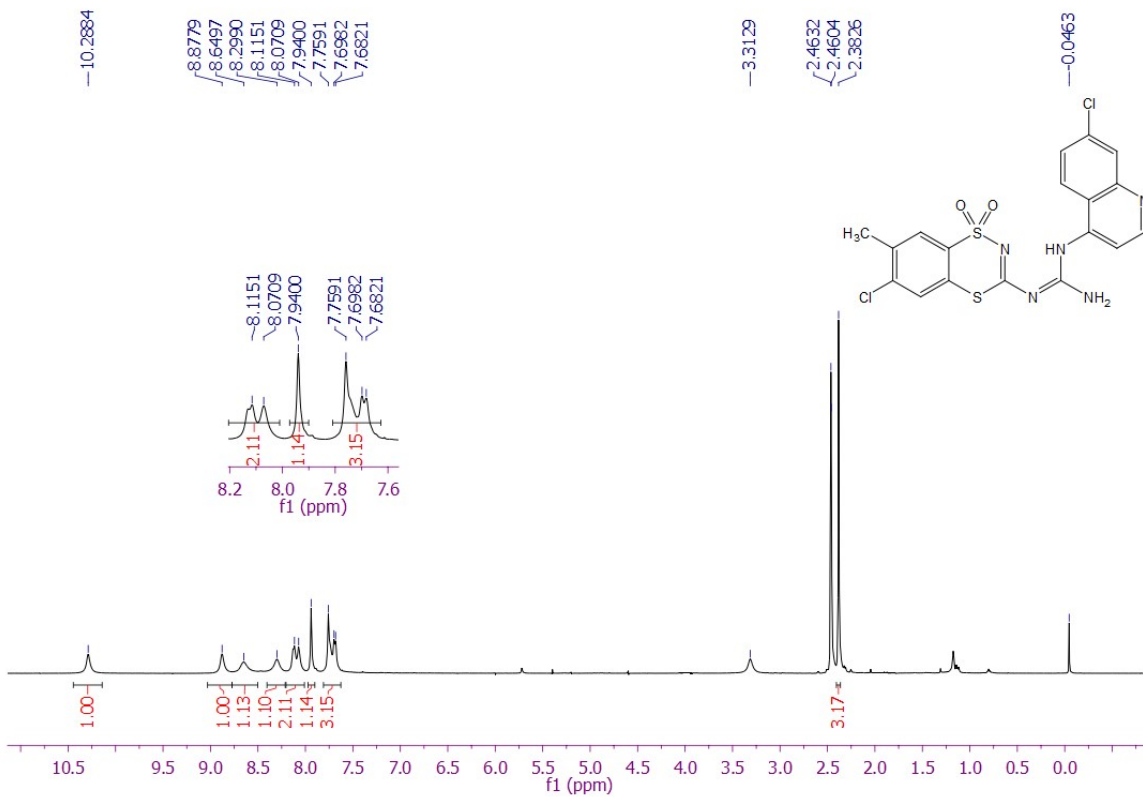

**Figure S34.** <sup>1</sup>H NMR spectrum of **10q** (600 MHz, DMSO-*d*<sub>6</sub>)

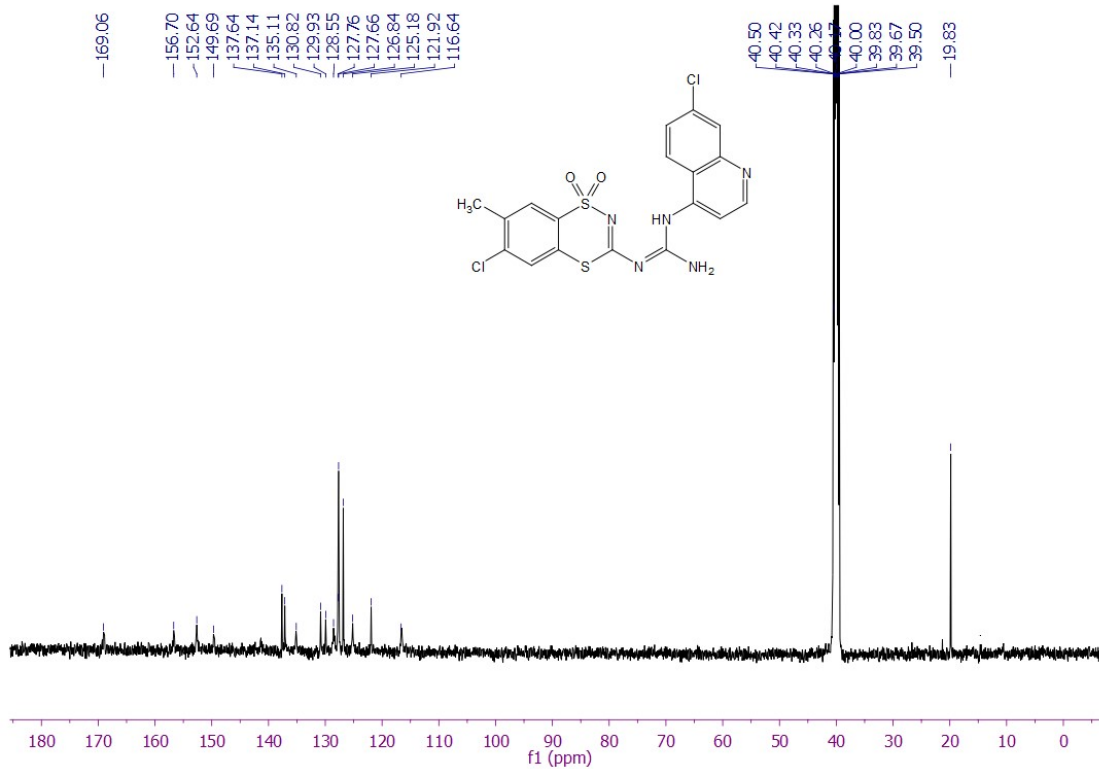

**Figure S35.** <sup>13</sup>C NMR spectrum of **10q** (151 MHz, DMSO-*d*<sub>6</sub>)

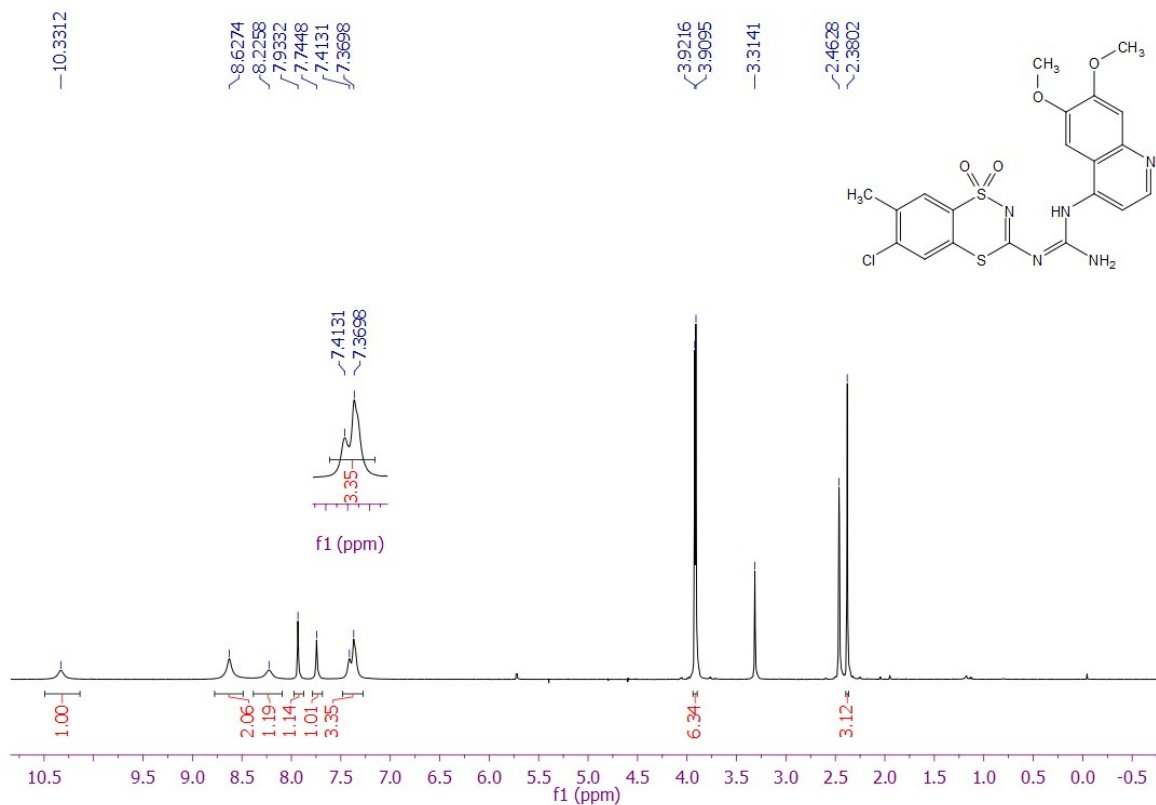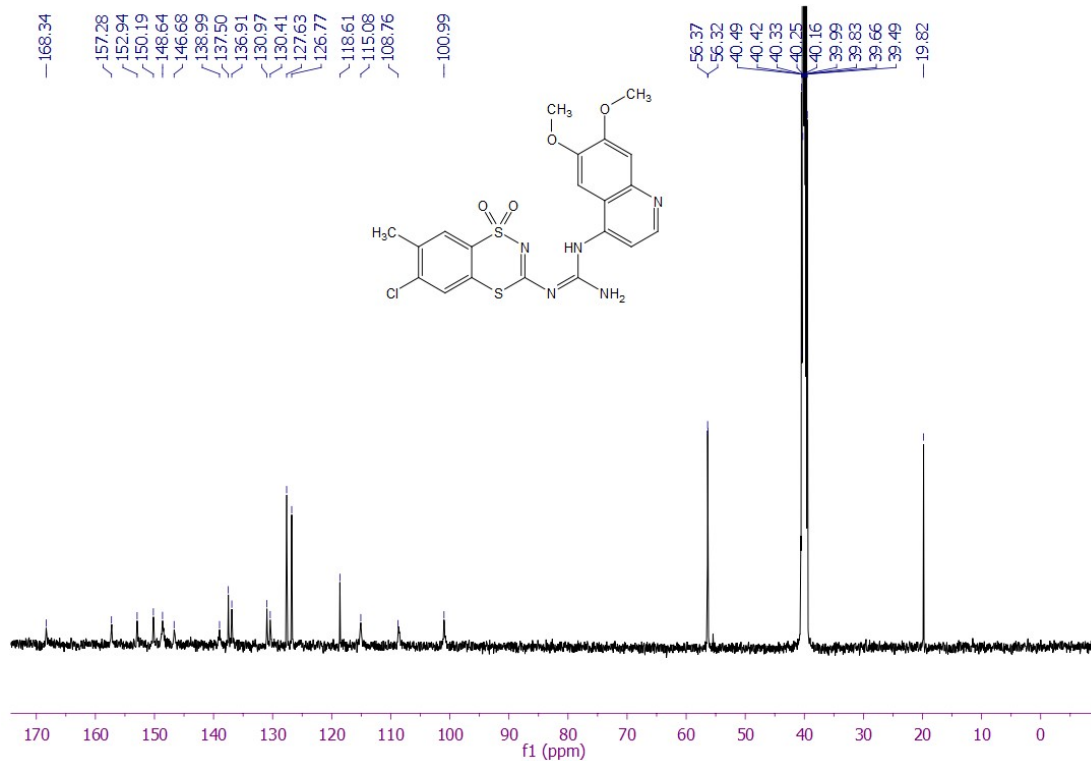

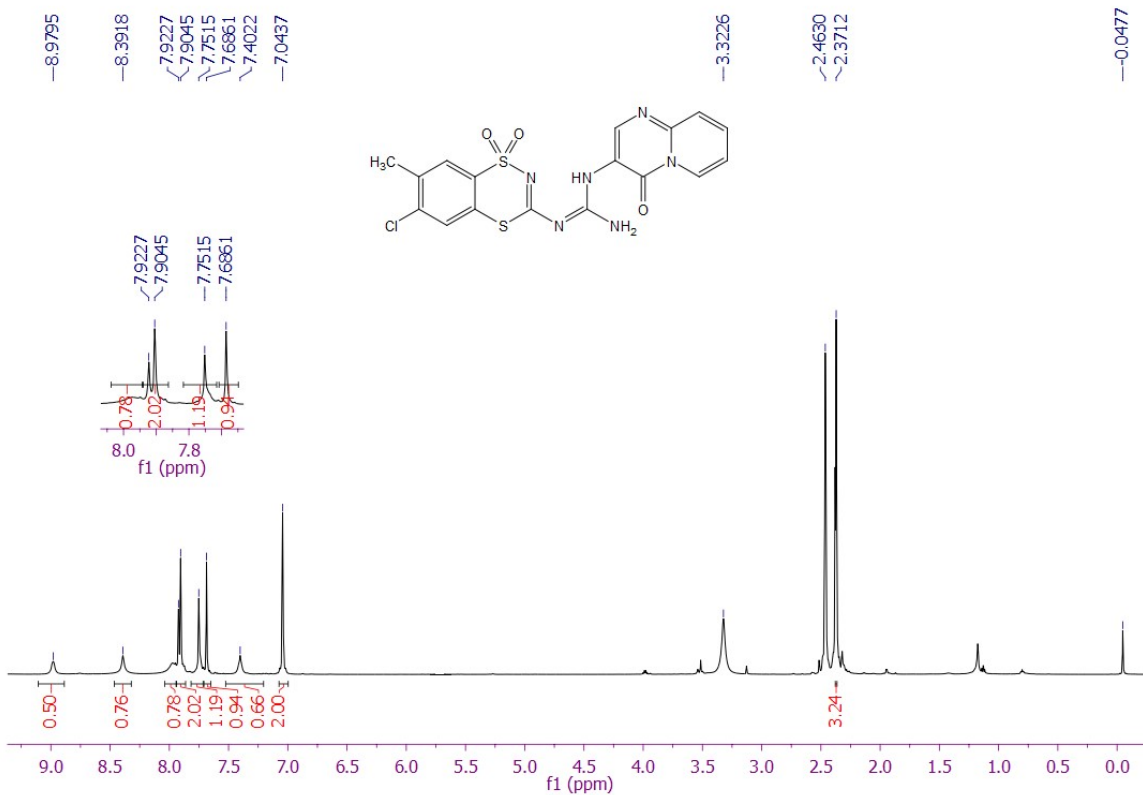

**Figure S38.** <sup>1</sup>H NMR spectrum of 10s (600 MHz, DMSO-*d*<sub>6</sub>)

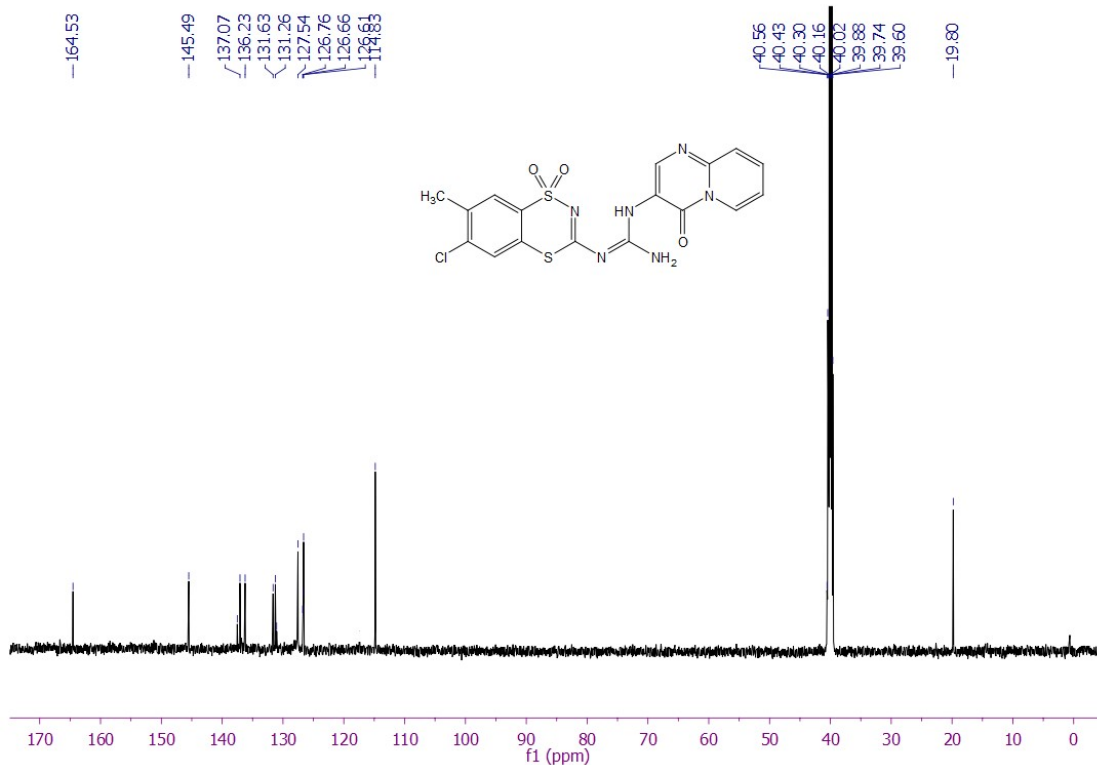

**Figure S39.** <sup>13</sup>C NMR spectrum of 10s (151 MHz, DMSO-*d*<sub>6</sub>)

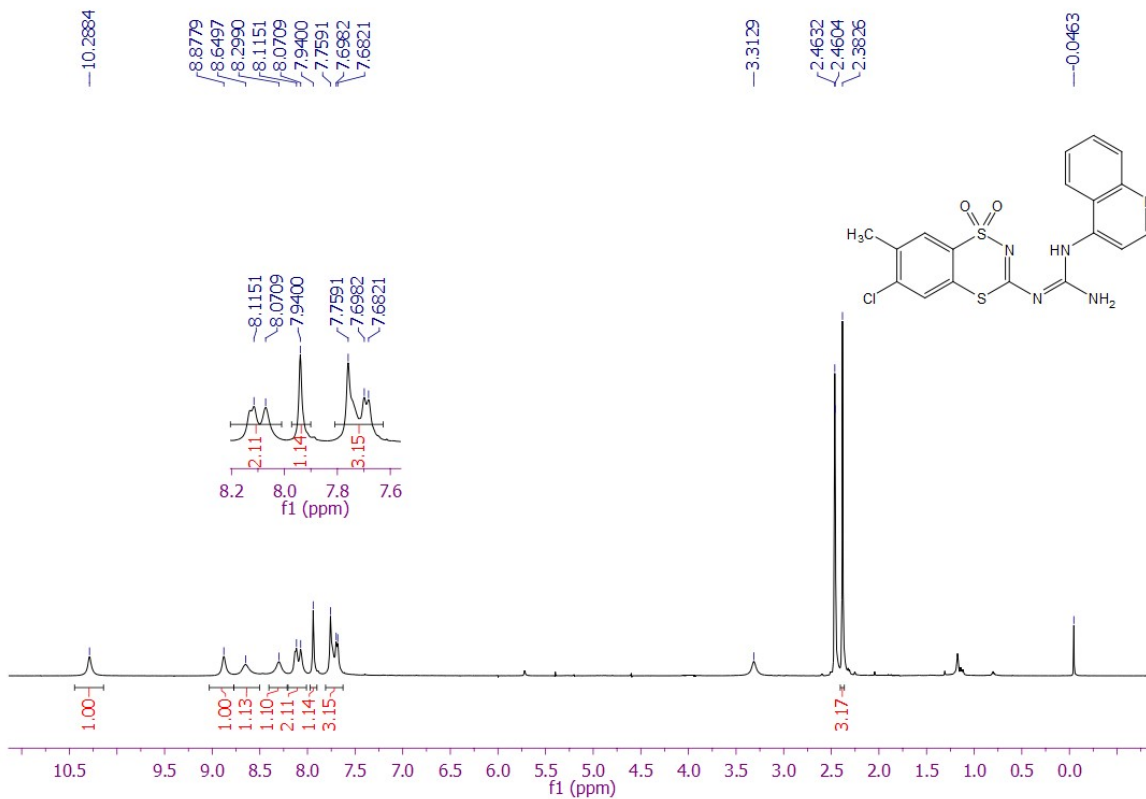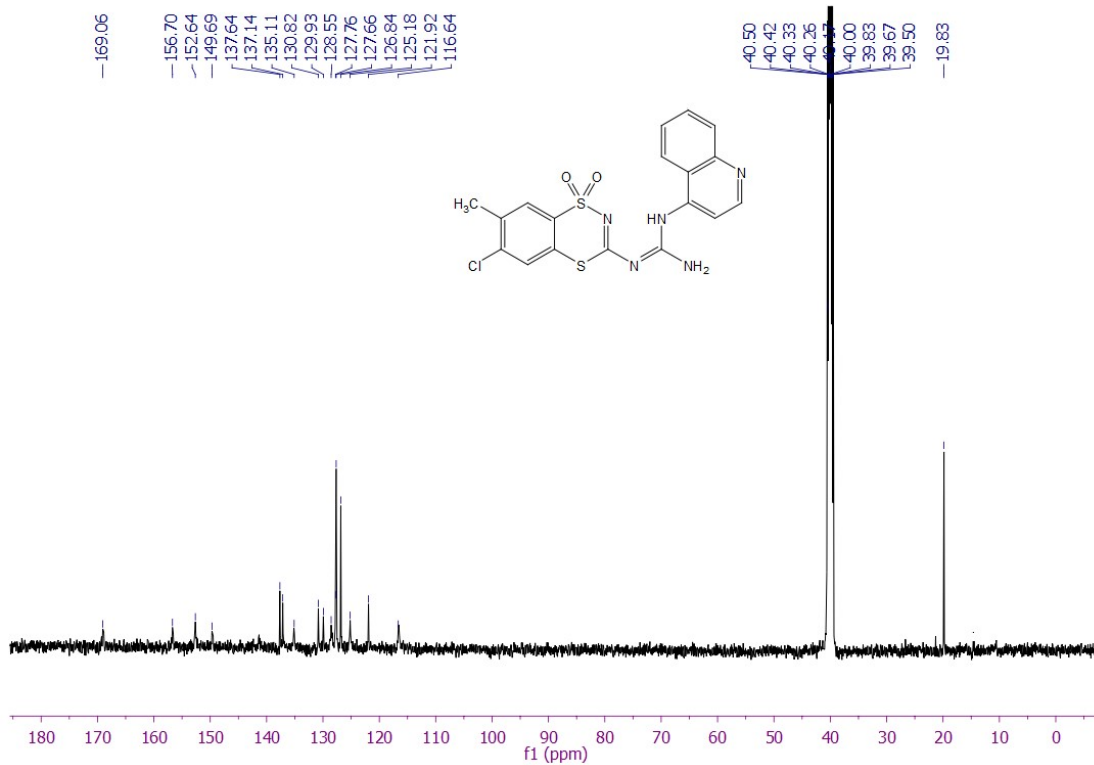

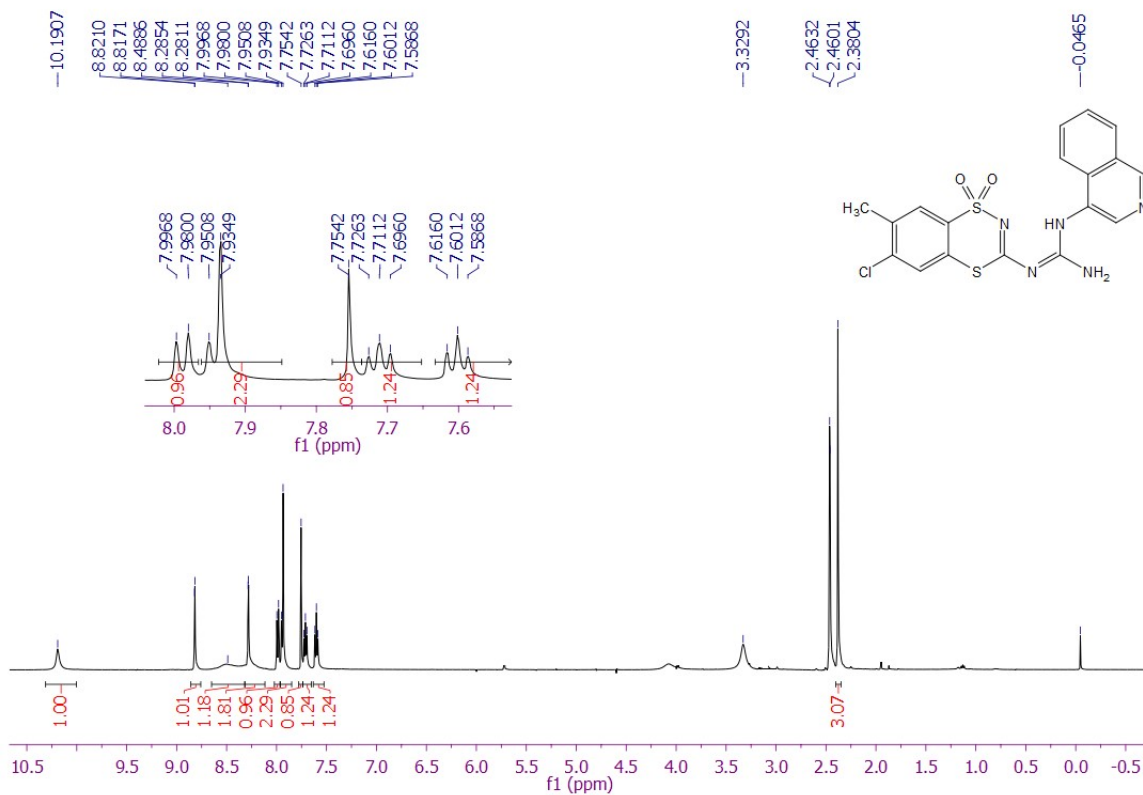

**Figure S42.** <sup>1</sup>H NMR spectrum of **10u** (600 MHz, DMSO-*d*<sub>6</sub>)

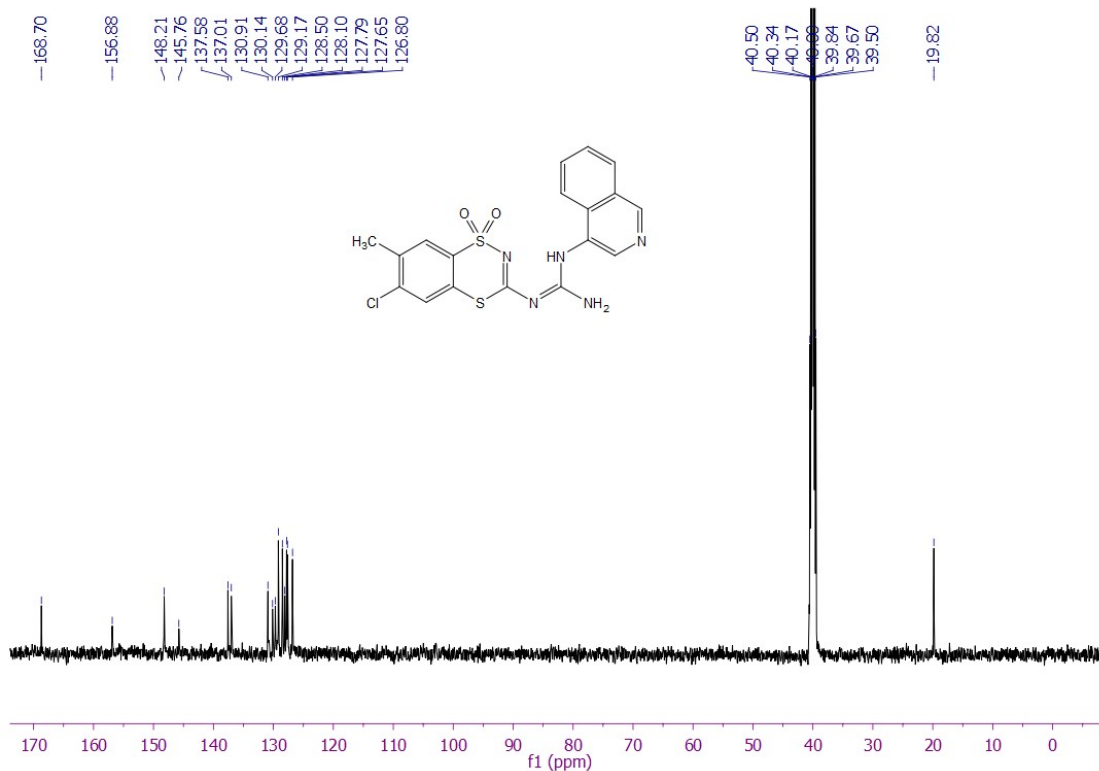

**Figure S43.** <sup>13</sup>C NMR spectrum of **10u** (151 MHz, DMSO-*d*<sub>6</sub>)

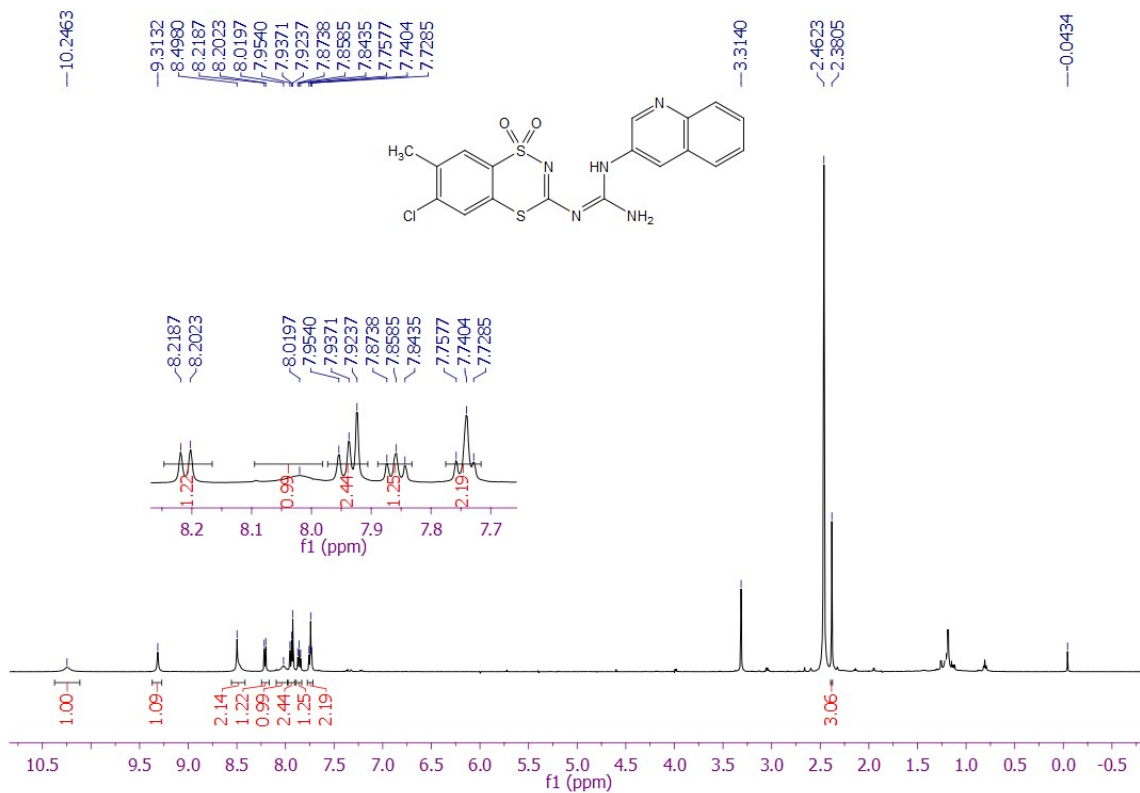

Figure S44. <sup>1</sup>H NMR spectrum of 10v (600 MHz, DMSO-*d*<sub>6</sub>)

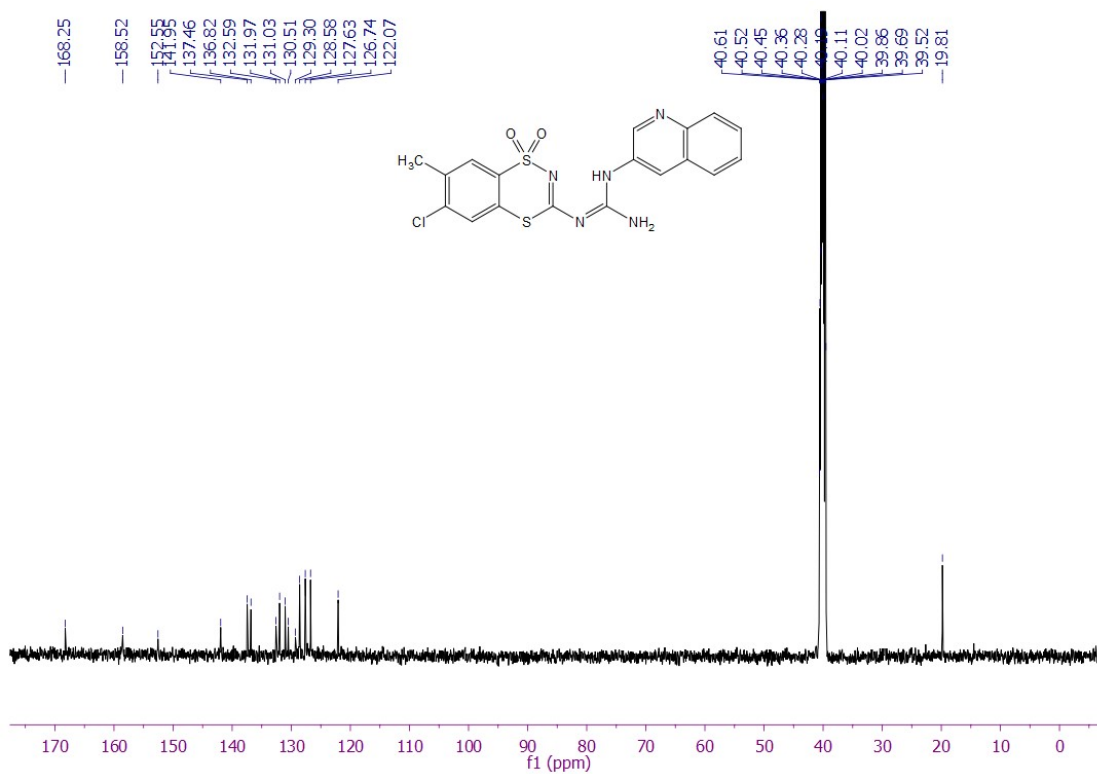

Figure S45. <sup>13</sup>C NMR spectrum of 10v (151 MHz, DMSO-*d*<sub>6</sub>)



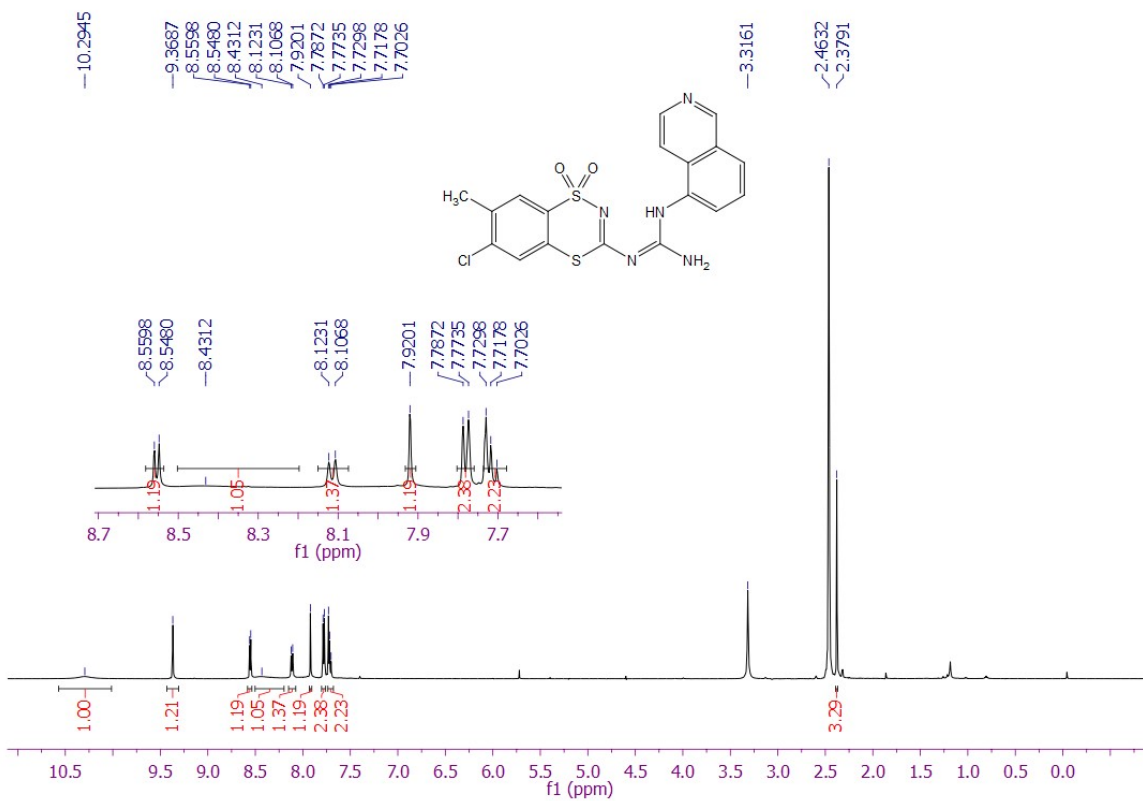

**Figure S46.** <sup>1</sup>H NMR spectrum of **10w** (600 MHz, DMSO-*d*<sub>6</sub>)

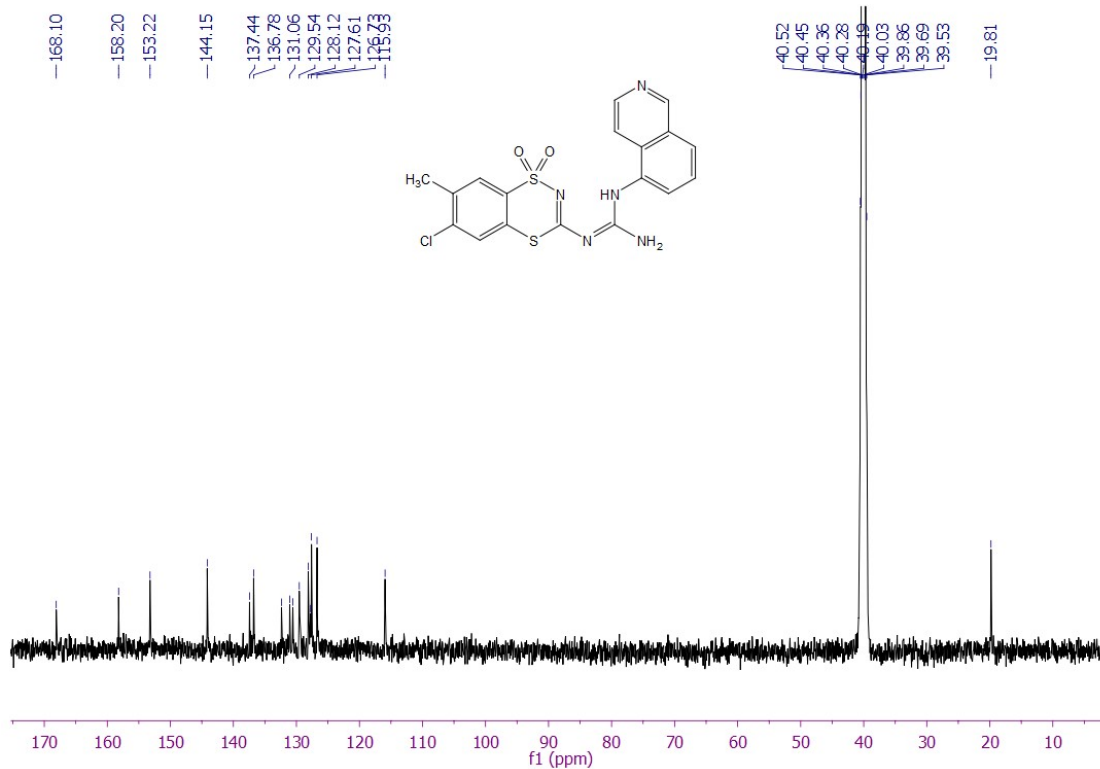

**Figure S47.** <sup>13</sup>C NMR spectrum of **10w** (151 MHz, DMSO-*d*<sub>6</sub>)

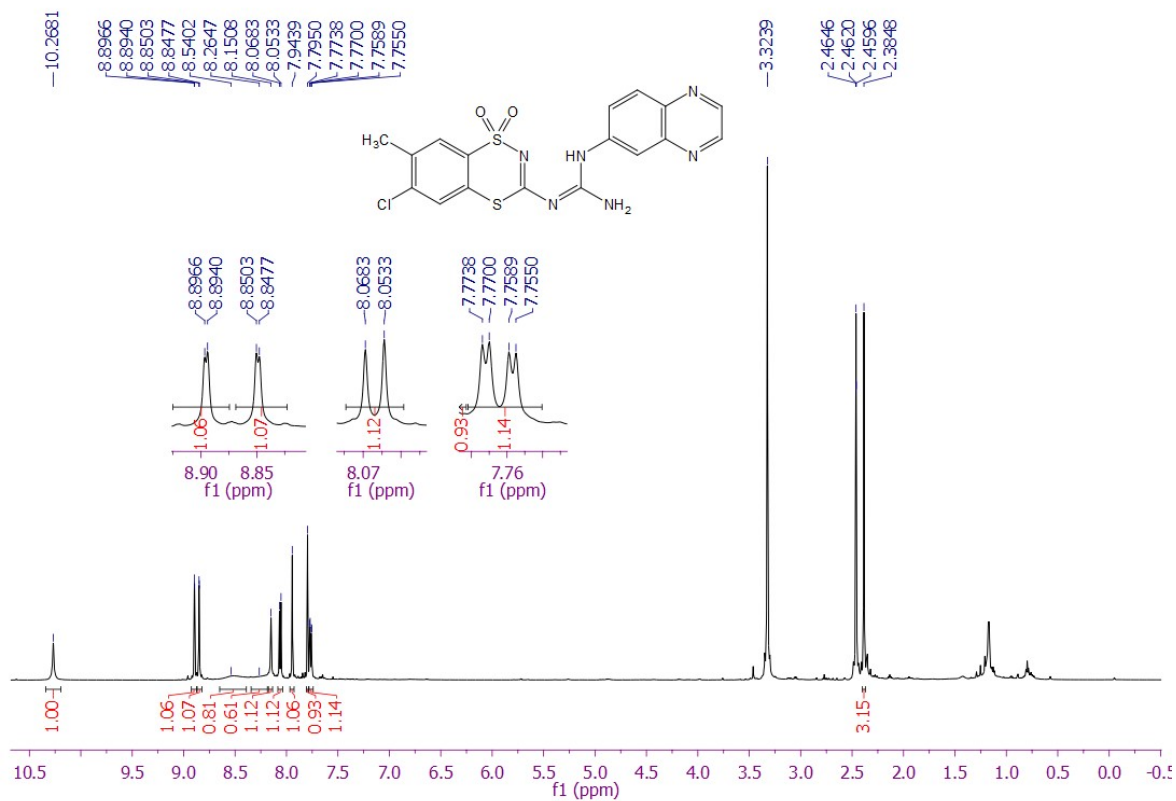

Figure S48. <sup>1</sup>H NMR spectrum of 10x (600 MHz, DMSO-*d*<sub>6</sub>)

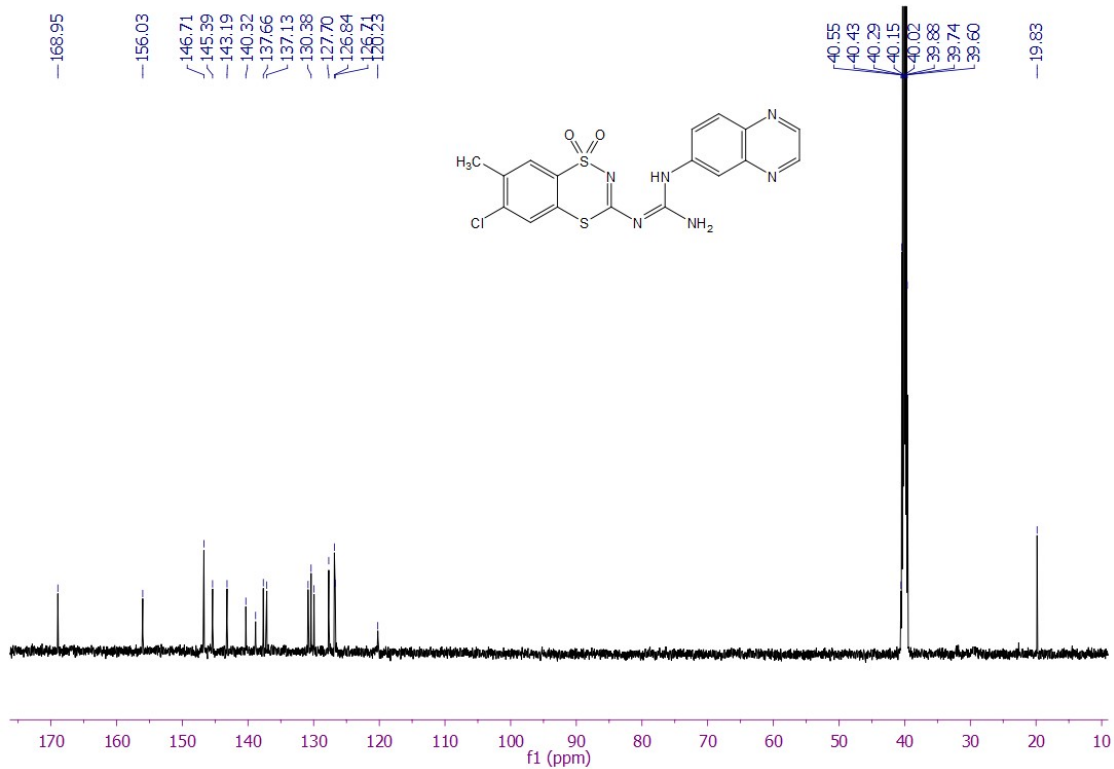

Figure S49. <sup>13</sup>C NMR spectrum of 10x (151 MHz, DMSO-*d*<sub>6</sub>)

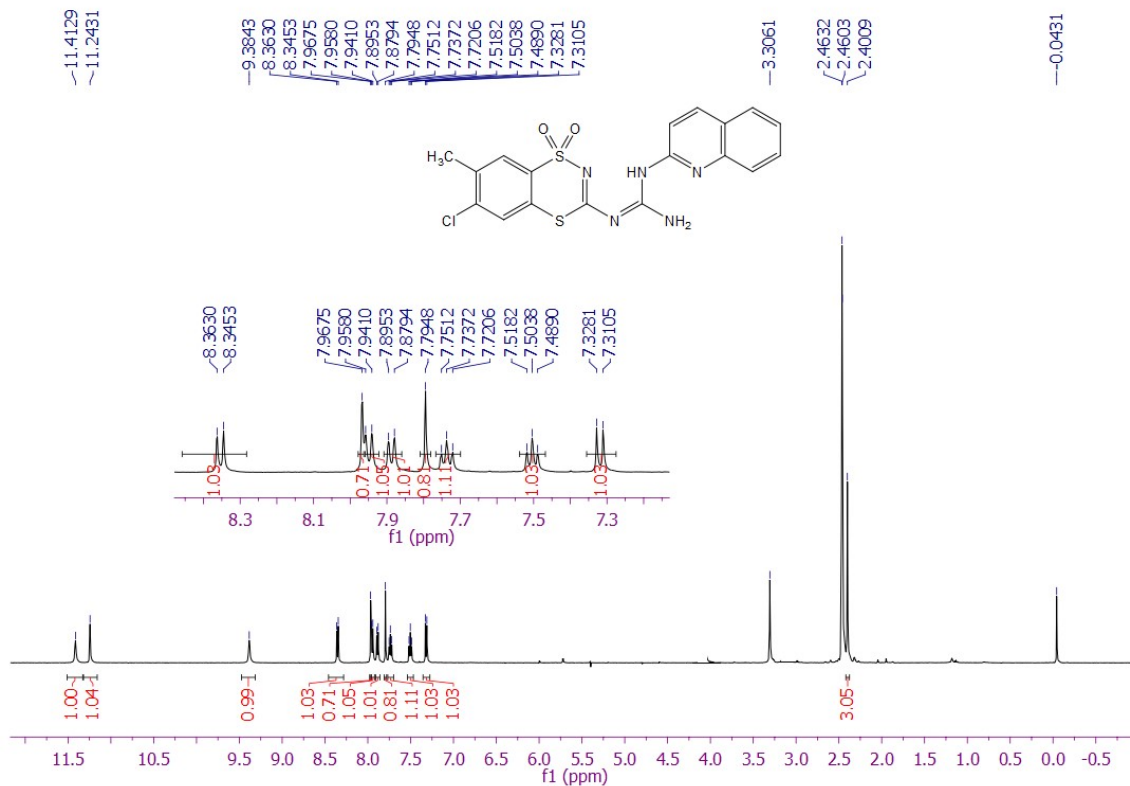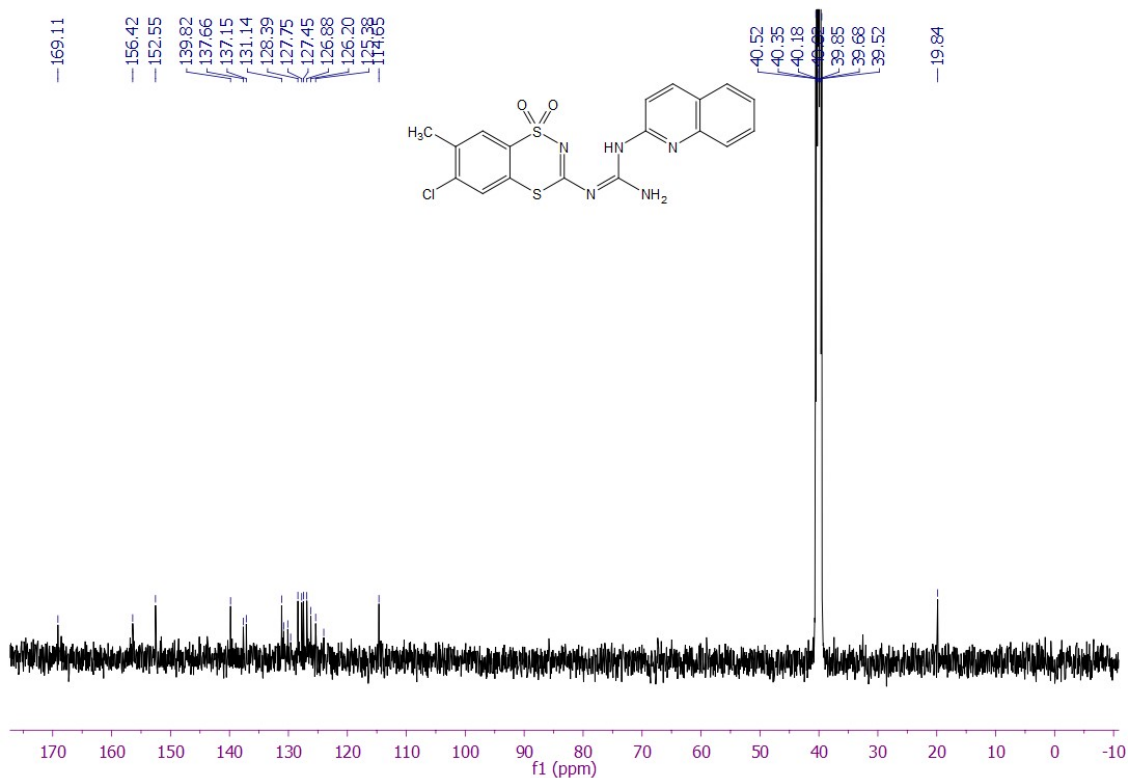

**Figure S51.**  $^{13}\text{C}$  NMR spectrum of **10y** (151 MHz,  $\text{DMSO-}d_6$ )

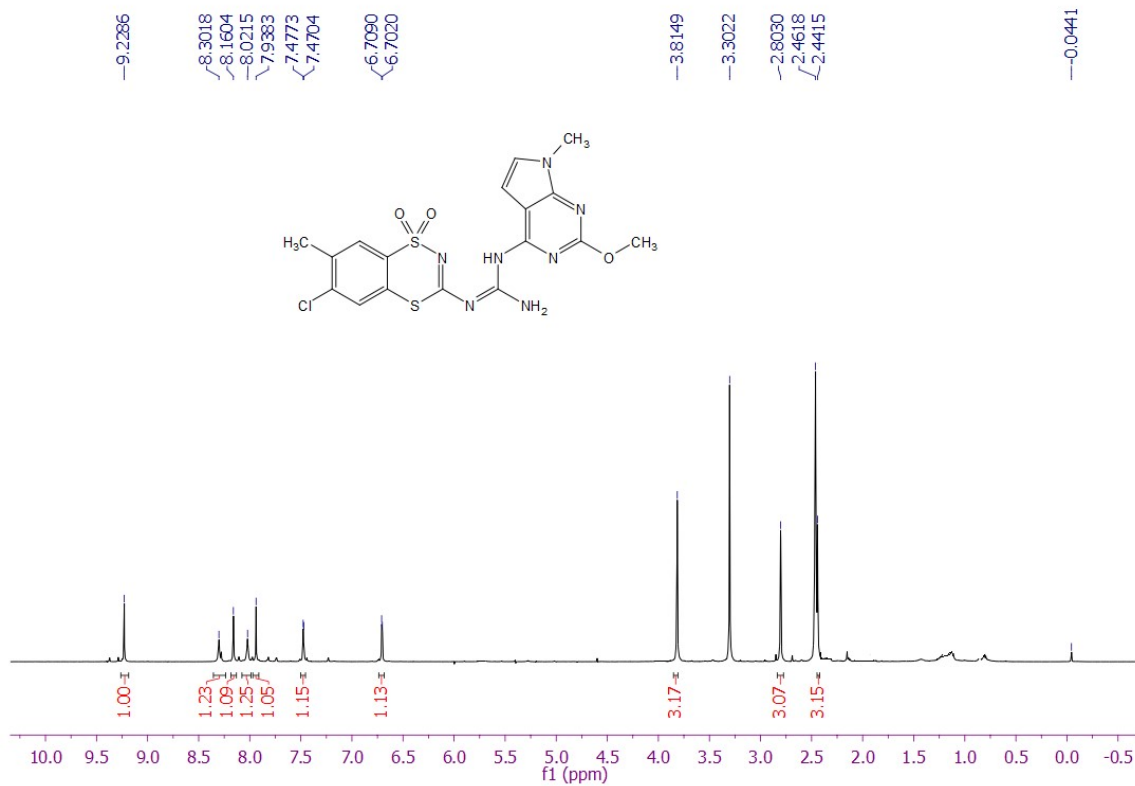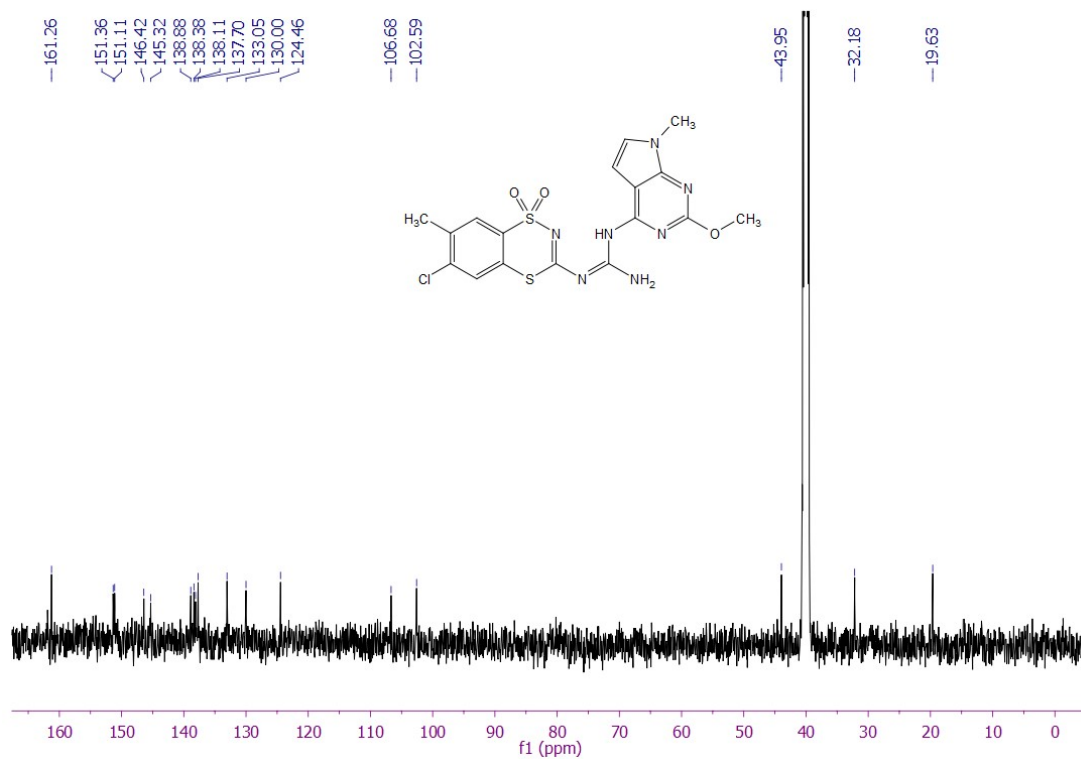

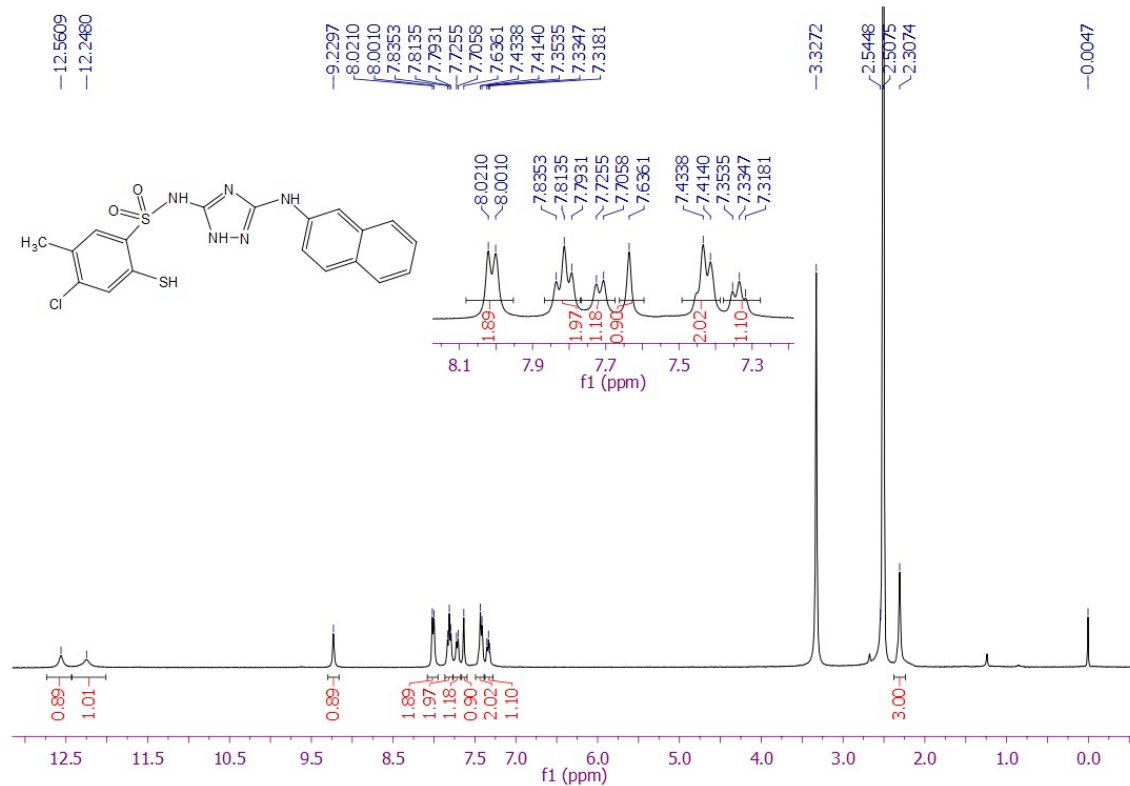

**Figure S54.** <sup>1</sup>H NMR spectrum of NSC-666719 (11a) (400 MHz, DMSO-*d*<sub>6</sub>)

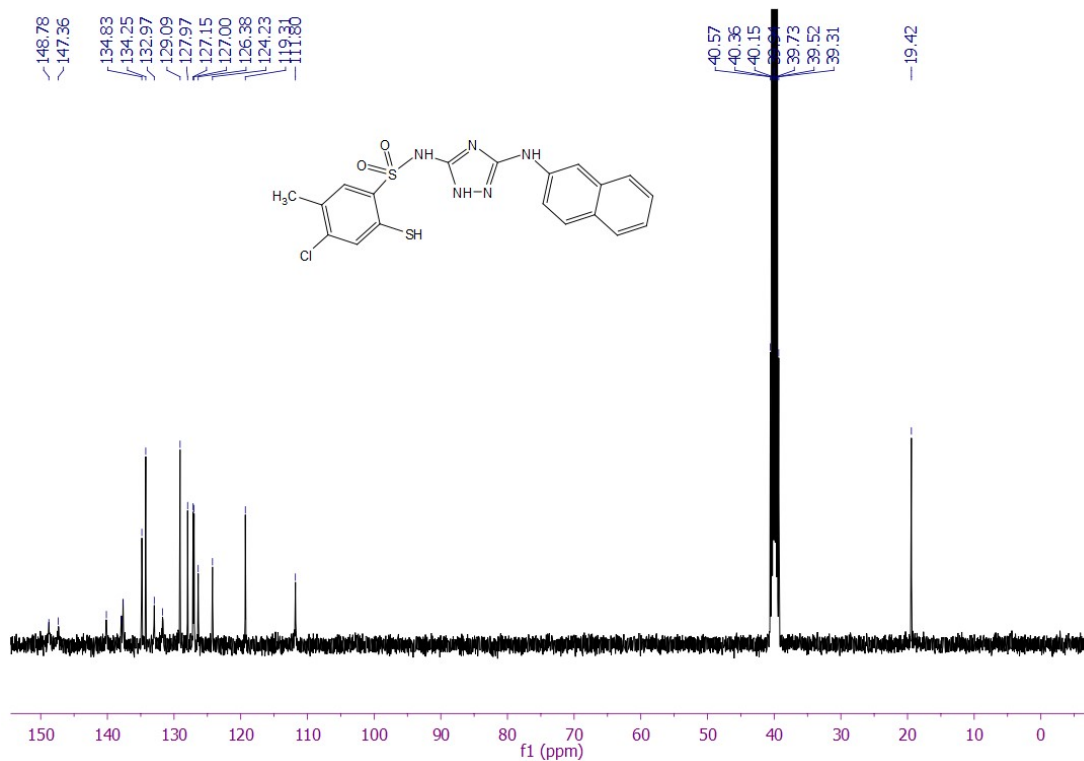

**Figure S55.** <sup>13</sup>C NMR spectrum of NSC-666719 (11a) (101 MHz, DMSO-*d*<sub>6</sub>)

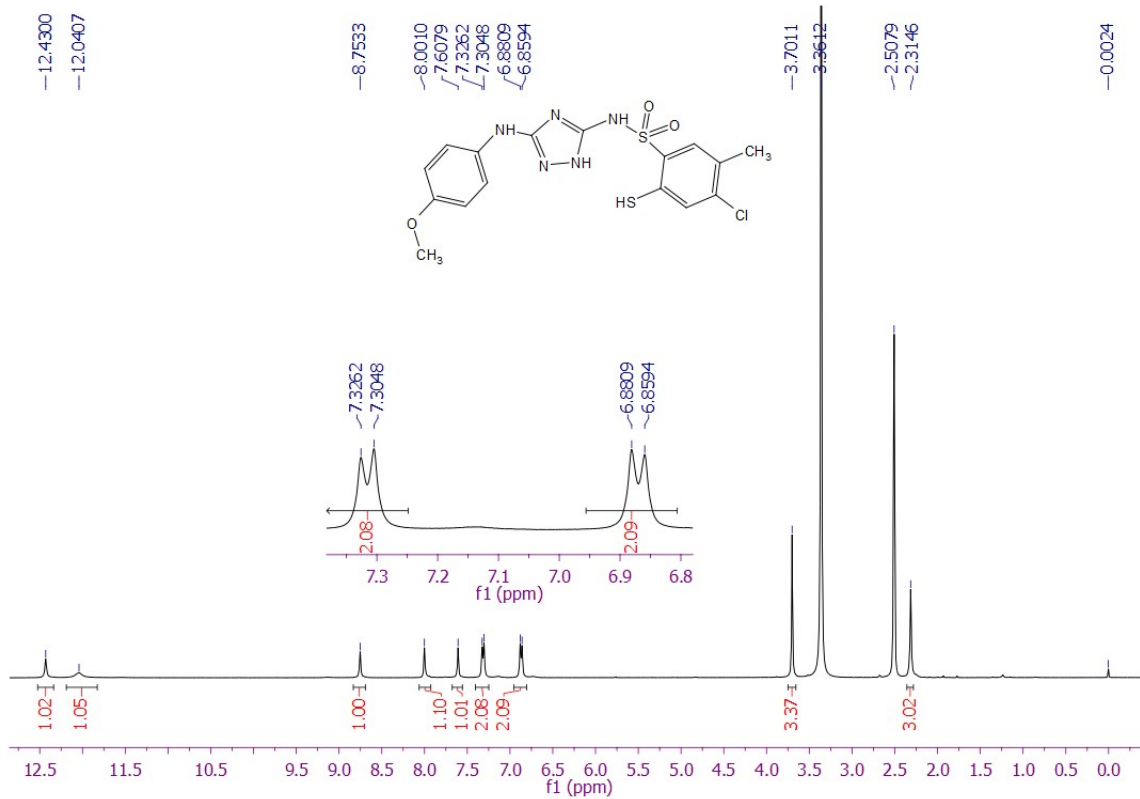

**Figure S56.** <sup>1</sup>H NMR spectrum of **11b** (400 MHz, DMSO-*d*<sub>6</sub>)

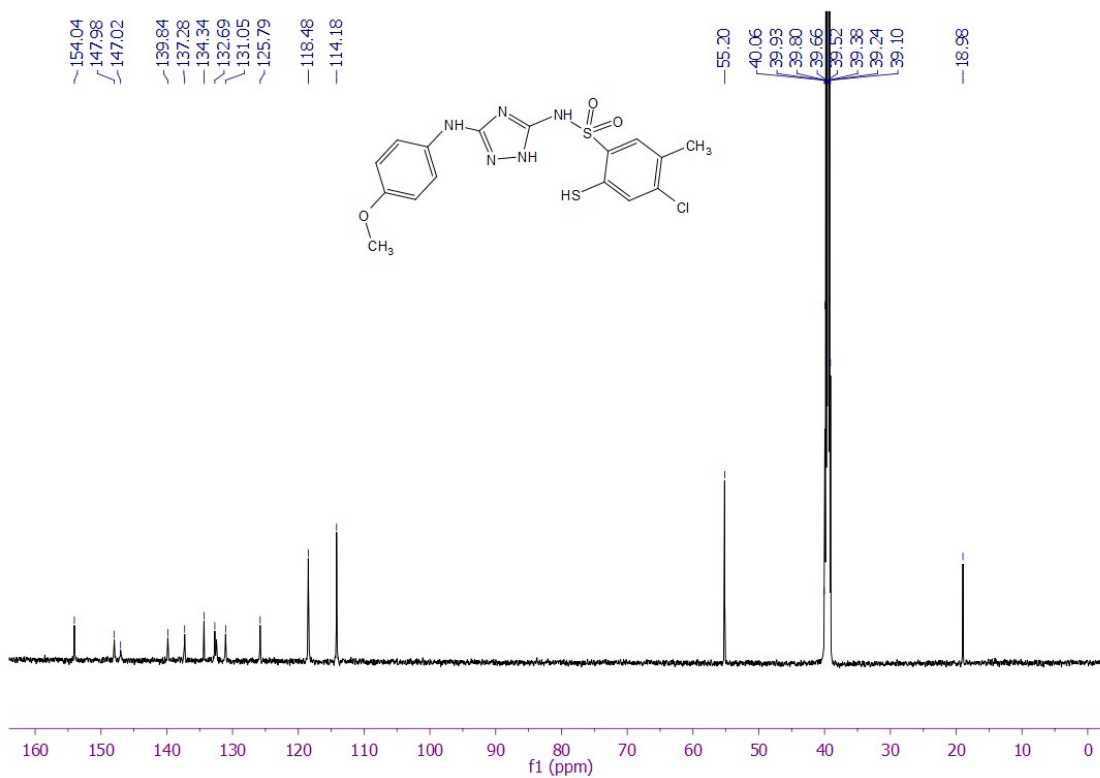

**Figure S57.** <sup>13</sup>C NMR spectrum of **11b** (101 MHz, DMSO-*d*<sub>6</sub>)

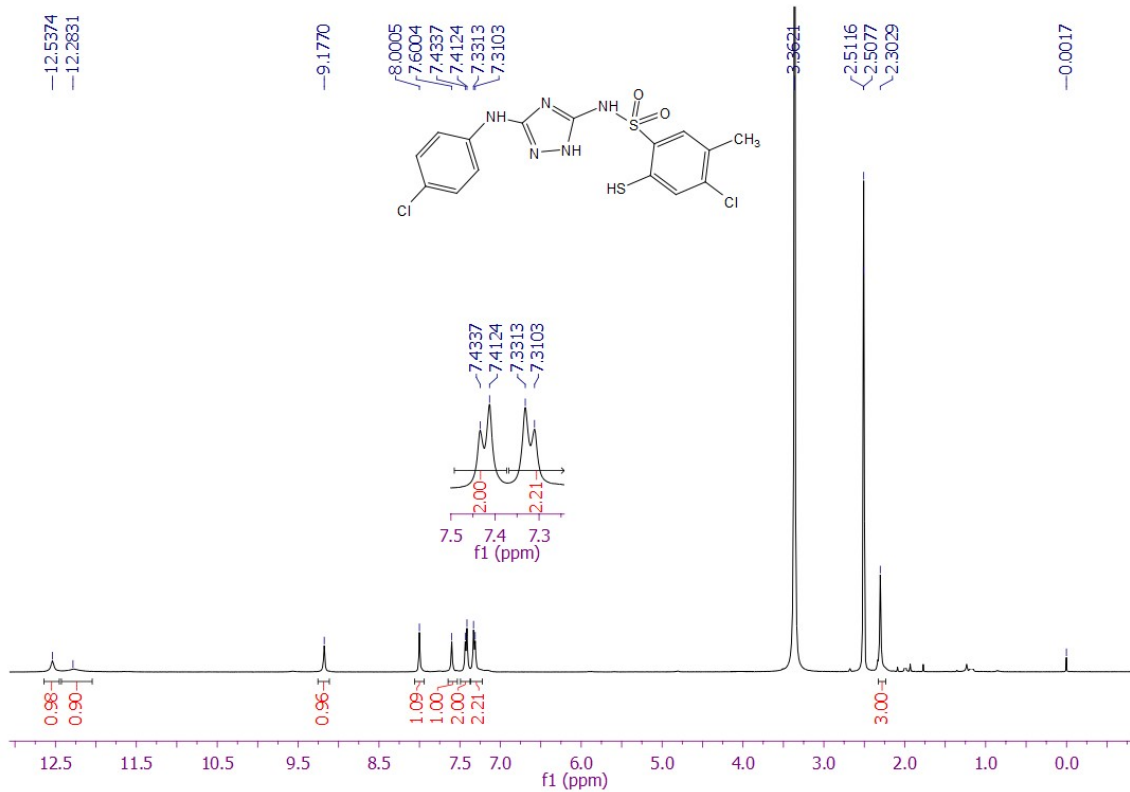

Figure S58. <sup>1</sup>H NMR spectrum of 11c (400 MHz, DMSO-*d*<sub>6</sub>)

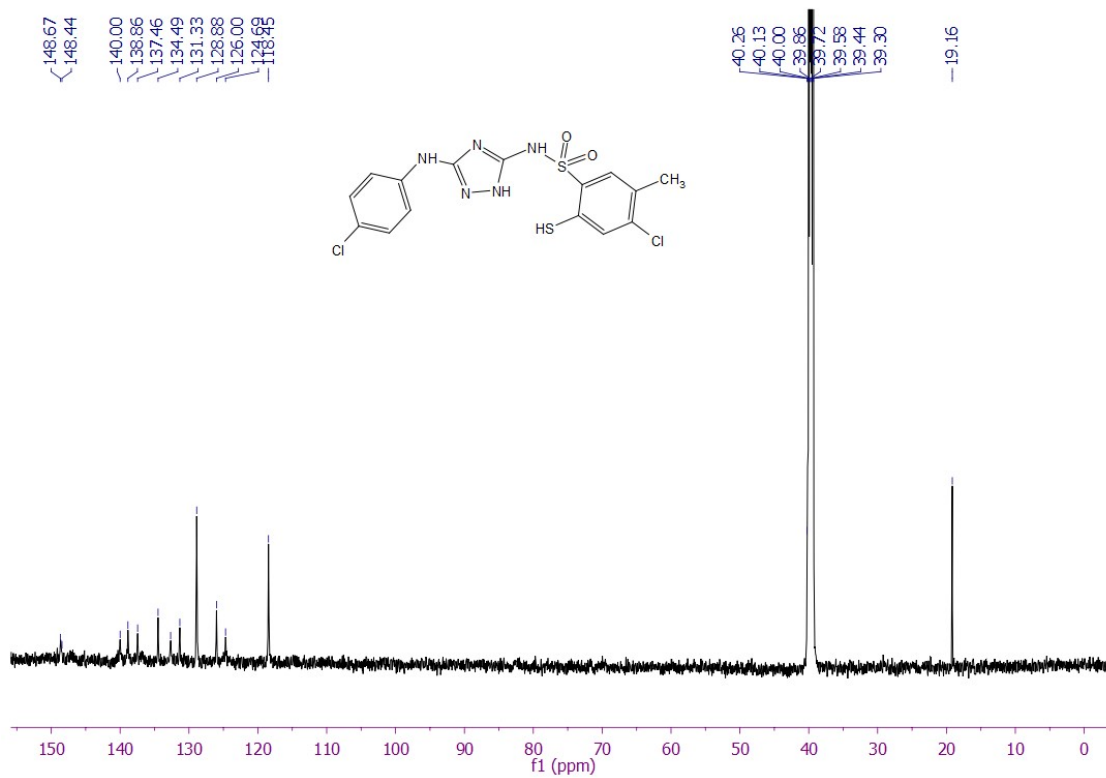

Figure S59. <sup>13</sup>C NMR spectrum of 11c (101 MHz, DMSO-*d*<sub>6</sub>)

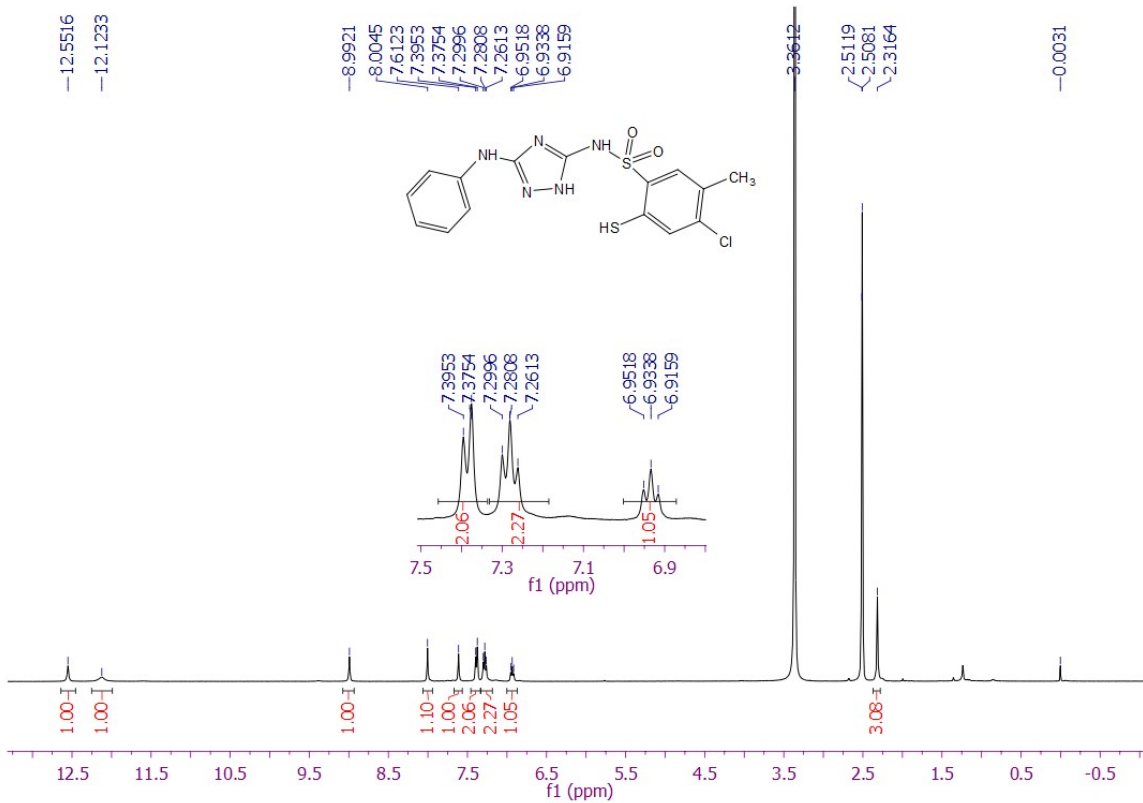

**Figure S60.** <sup>1</sup>H NMR spectrum of **11d** (400 MHz, DMSO-*d*<sub>6</sub>)

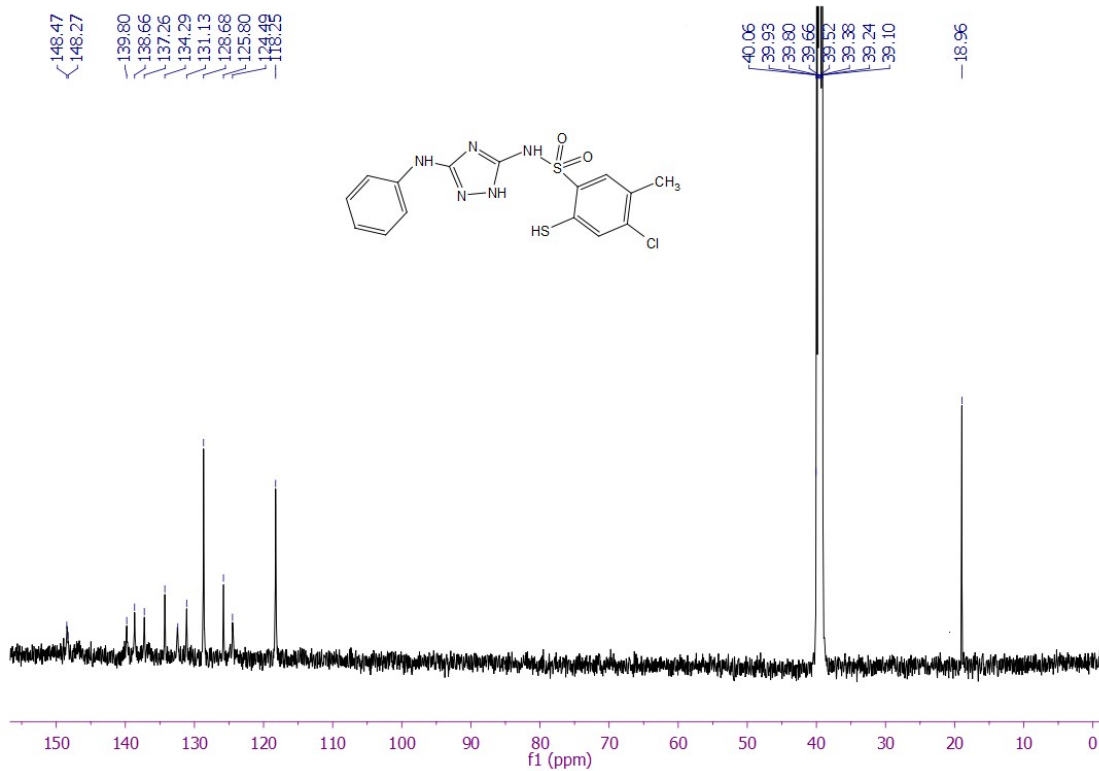

**Figure S61.** <sup>13</sup>C NMR spectrum of **11d** (101 MHz, DMSO-*d*<sub>6</sub>)



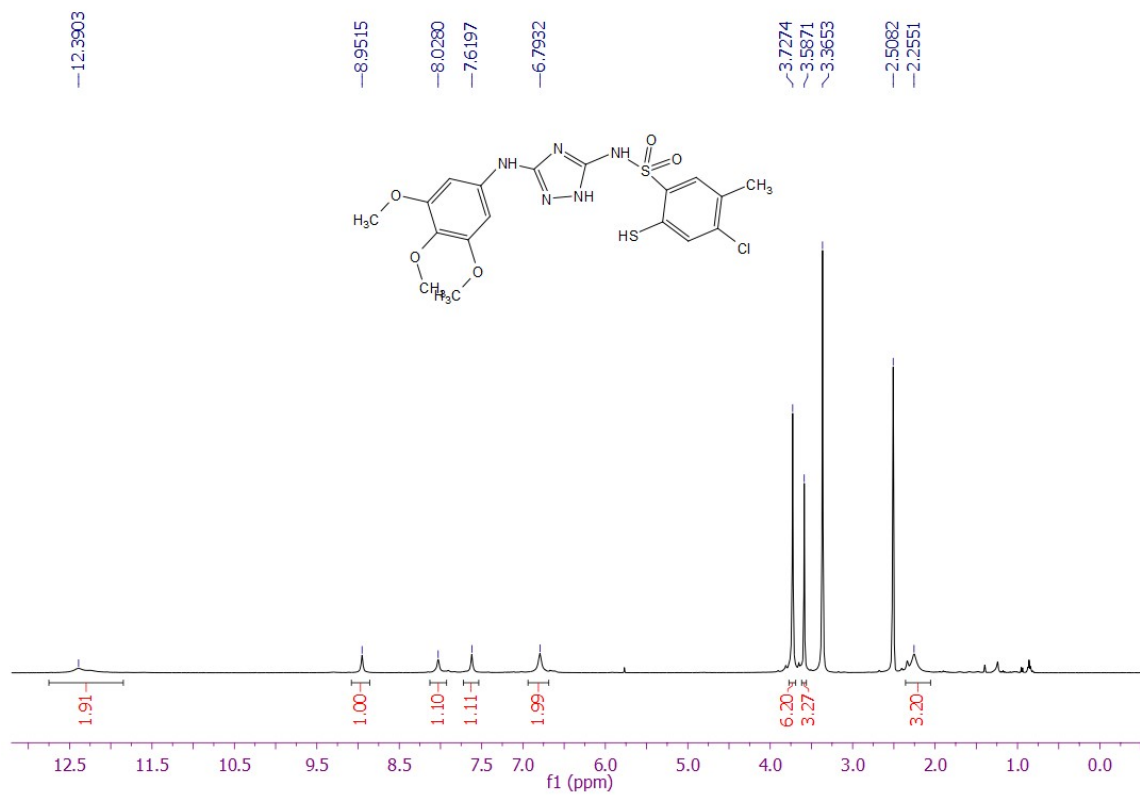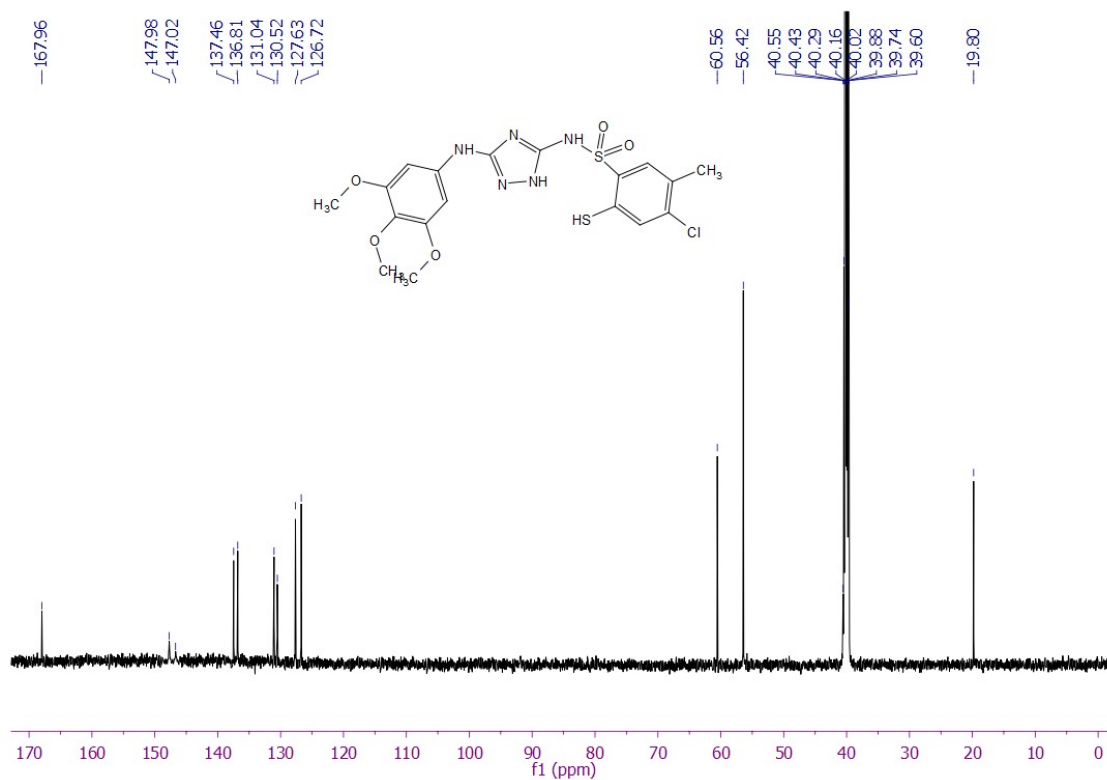

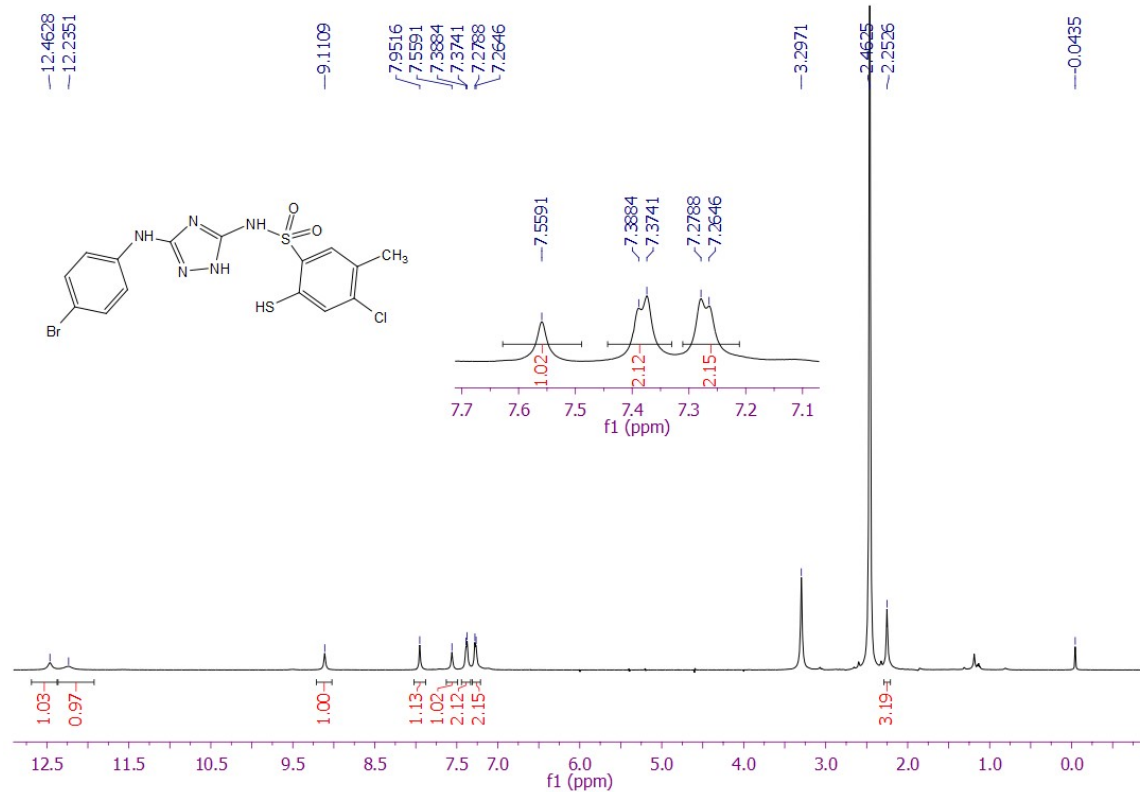

**Figure S64.** <sup>1</sup>H NMR spectrum of **11f** (400 MHz, DMSO-*d*<sub>6</sub>)

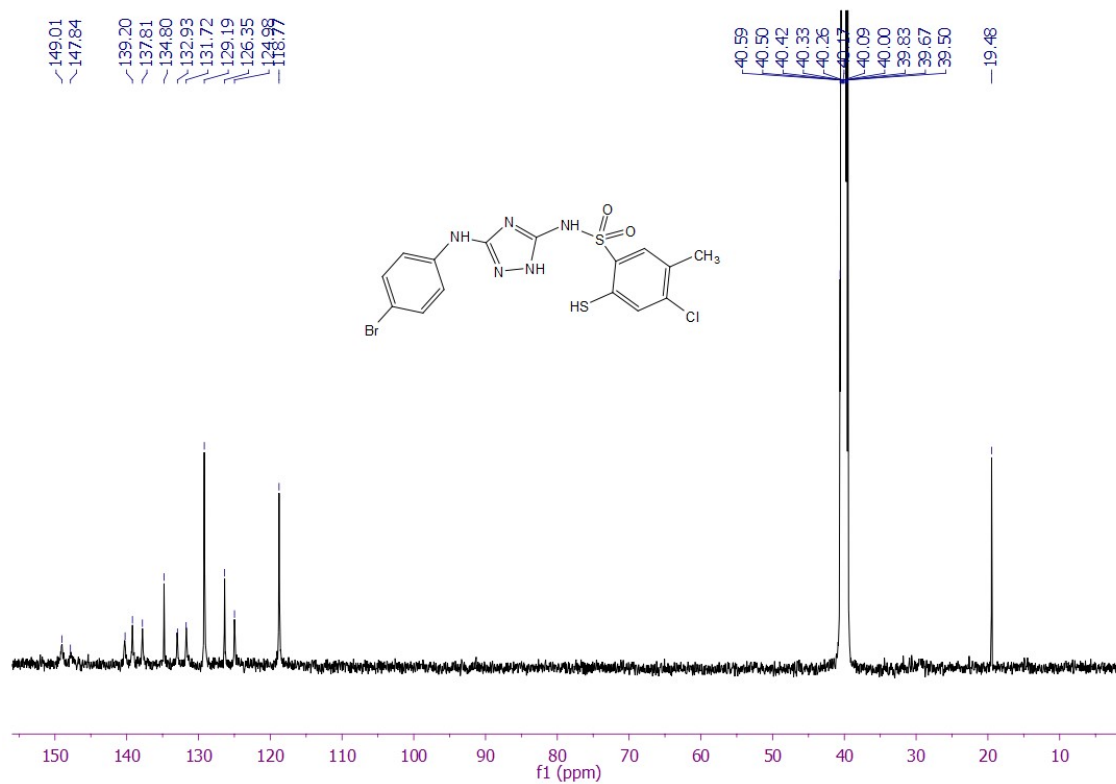

**Figure S65.** <sup>13</sup>C NMR spectrum of **11f** (101 MHz, DMSO-*d*<sub>6</sub>)

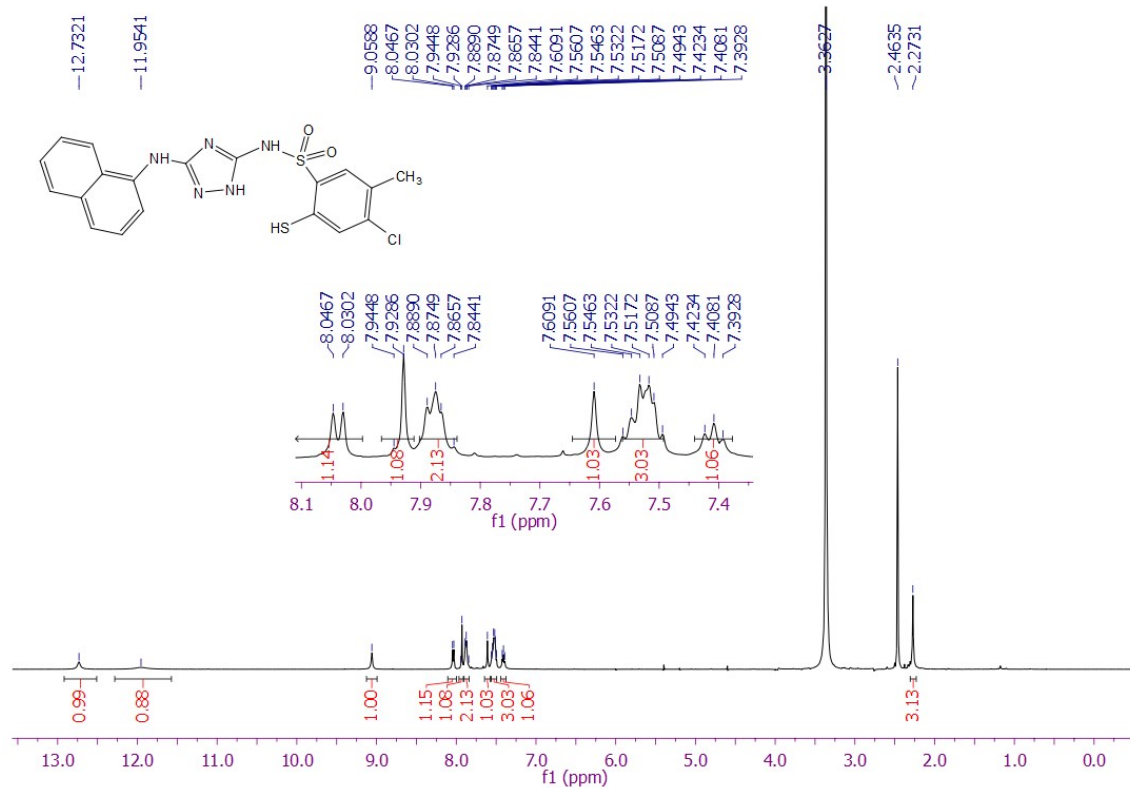

**Figure S66.** <sup>1</sup>H NMR spectrum of **11g** (400 MHz, DMSO-*d*<sub>6</sub>)

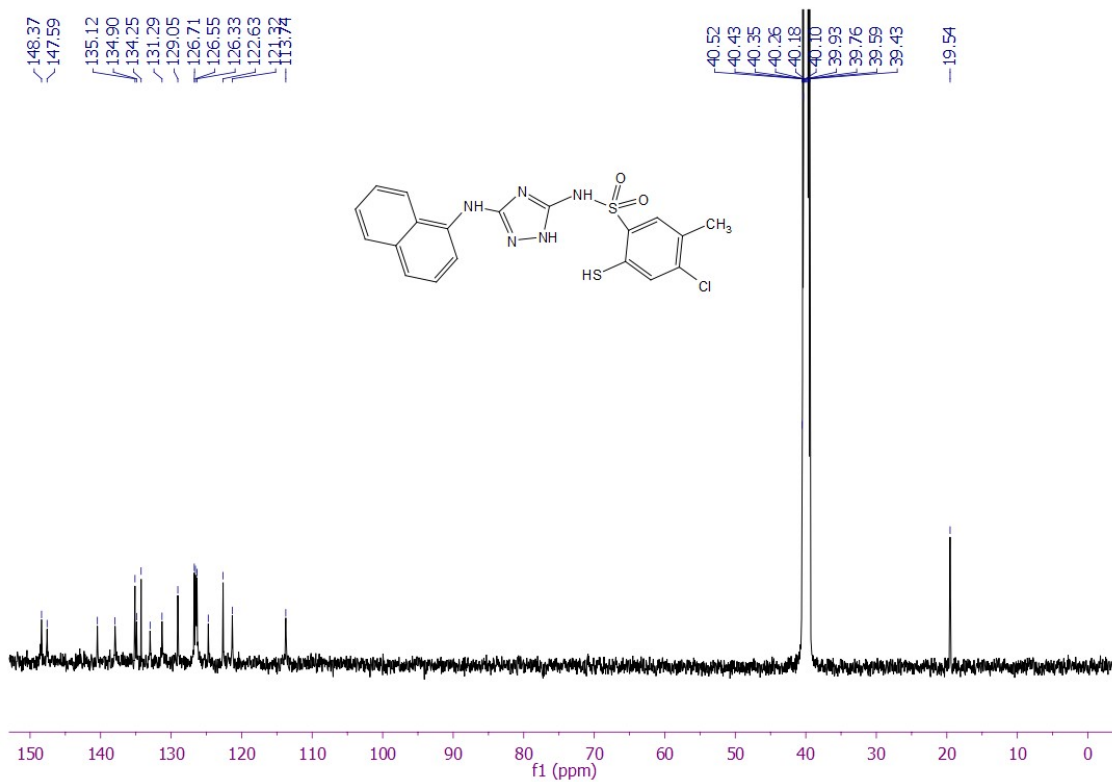

**Figure S67.** <sup>13</sup>C NMR spectrum of **11g** (101 MHz, DMSO-*d*<sub>6</sub>)

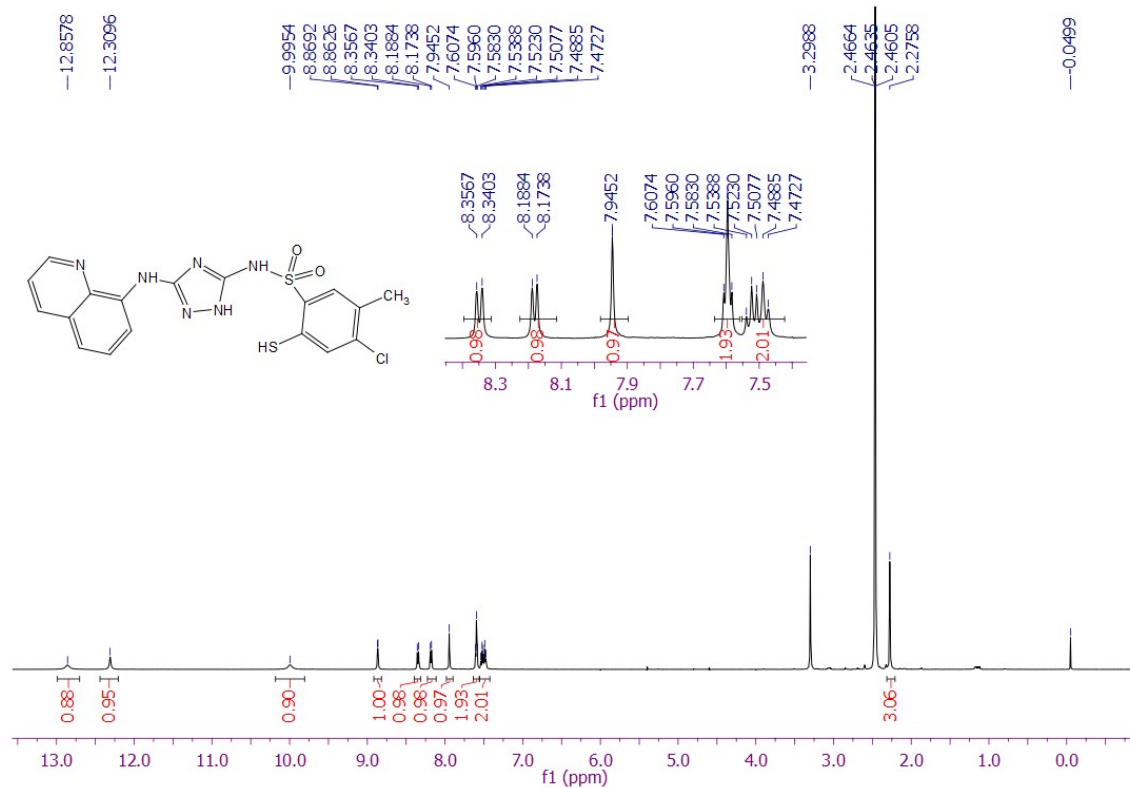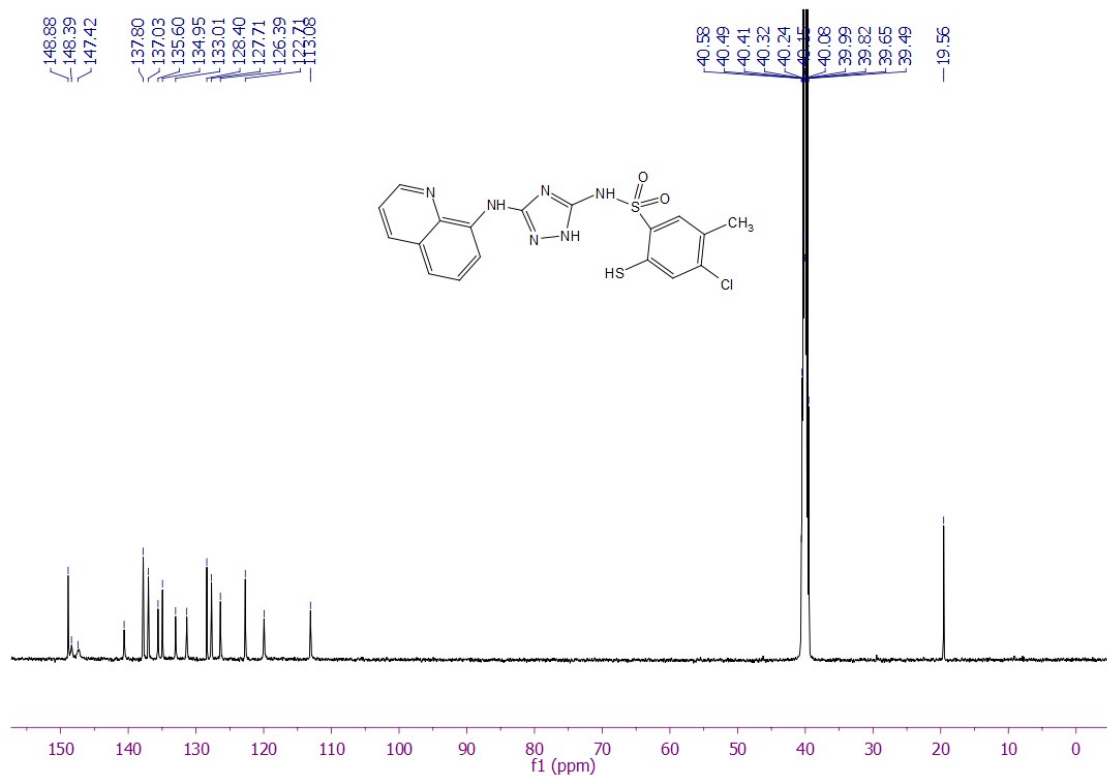

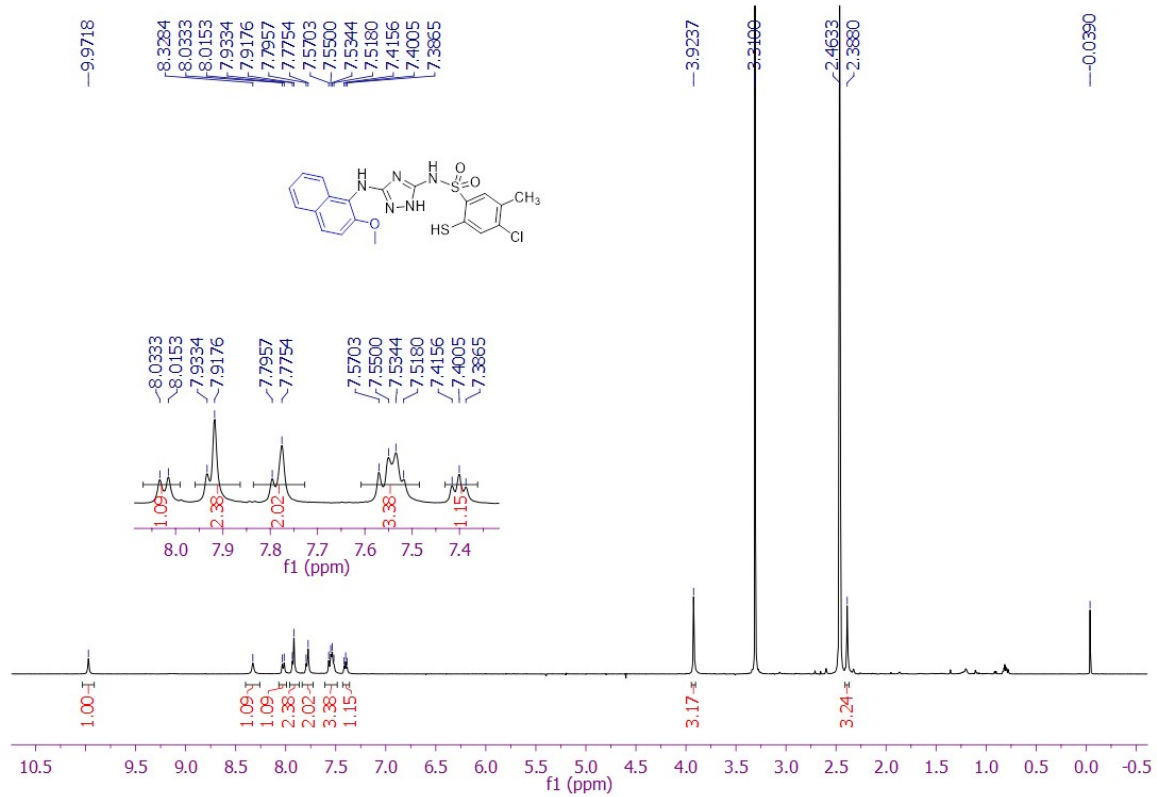

**Figure S70.** <sup>1</sup>H NMR spectrum of **11i** (500 MHz, DMSO-*d*<sub>6</sub>)

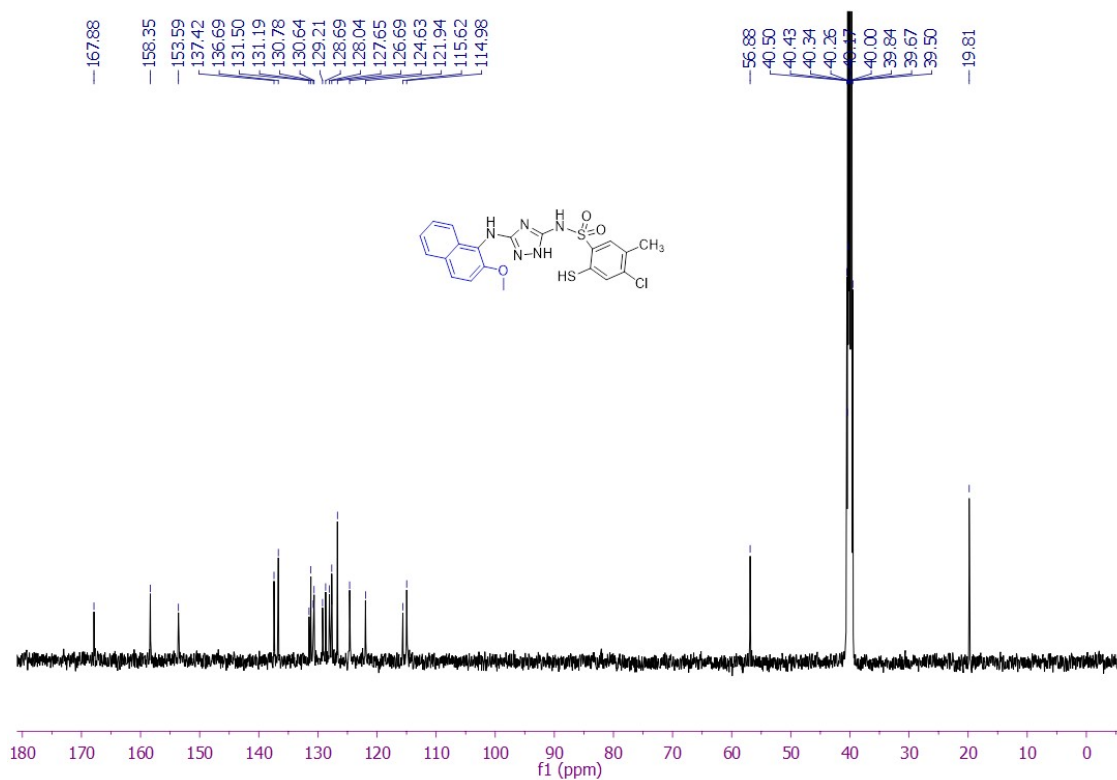

**Figure S71.** <sup>13</sup>C NMR spectrum of **11i** (126 MHz, DMSO-*d*<sub>6</sub>)

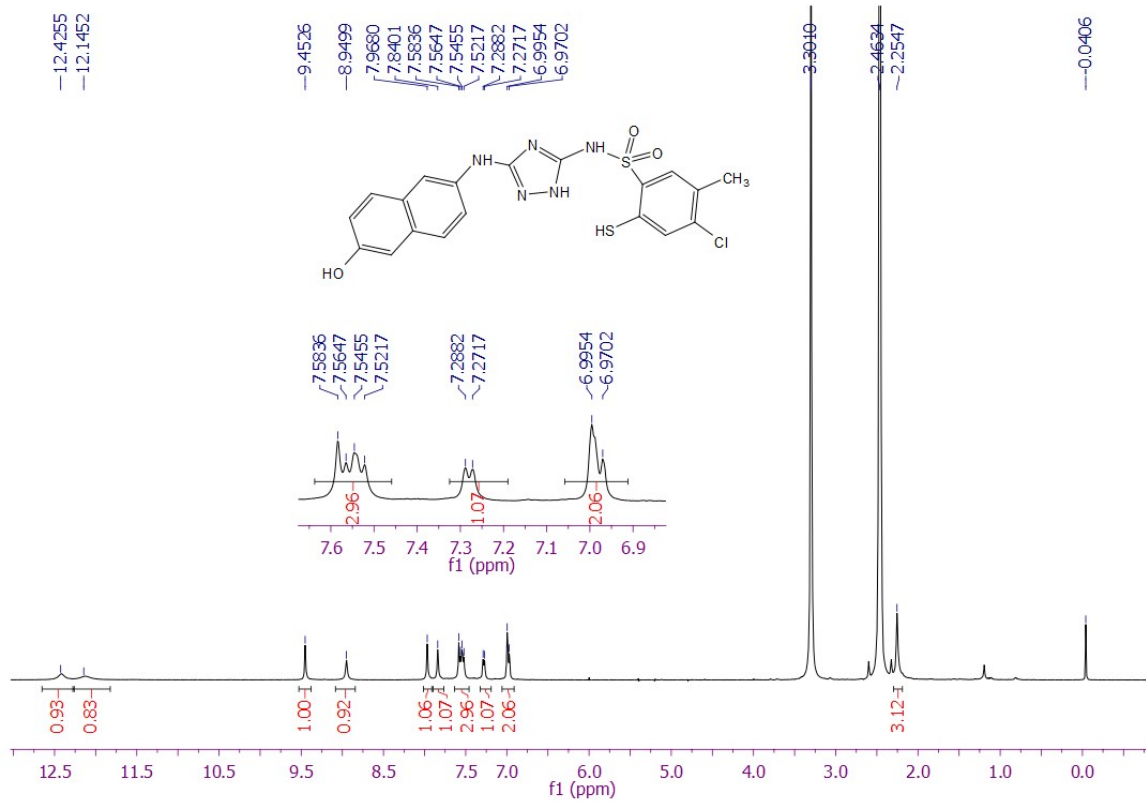

**Figure S72.** <sup>1</sup>H NMR spectrum of **11j** (500 MHz, DMSO-*d*<sub>6</sub>)

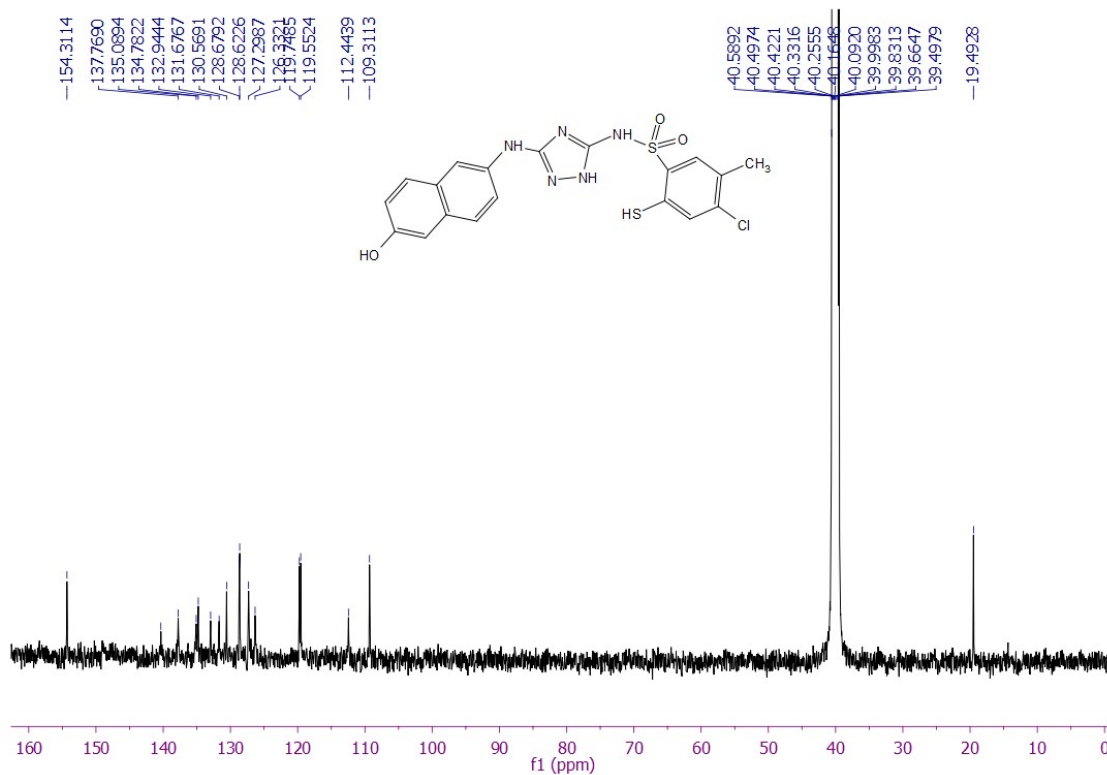

**Figure S73.** <sup>13</sup>C NMR spectrum of **11j** (126 MHz, DMSO-*d*<sub>6</sub>)

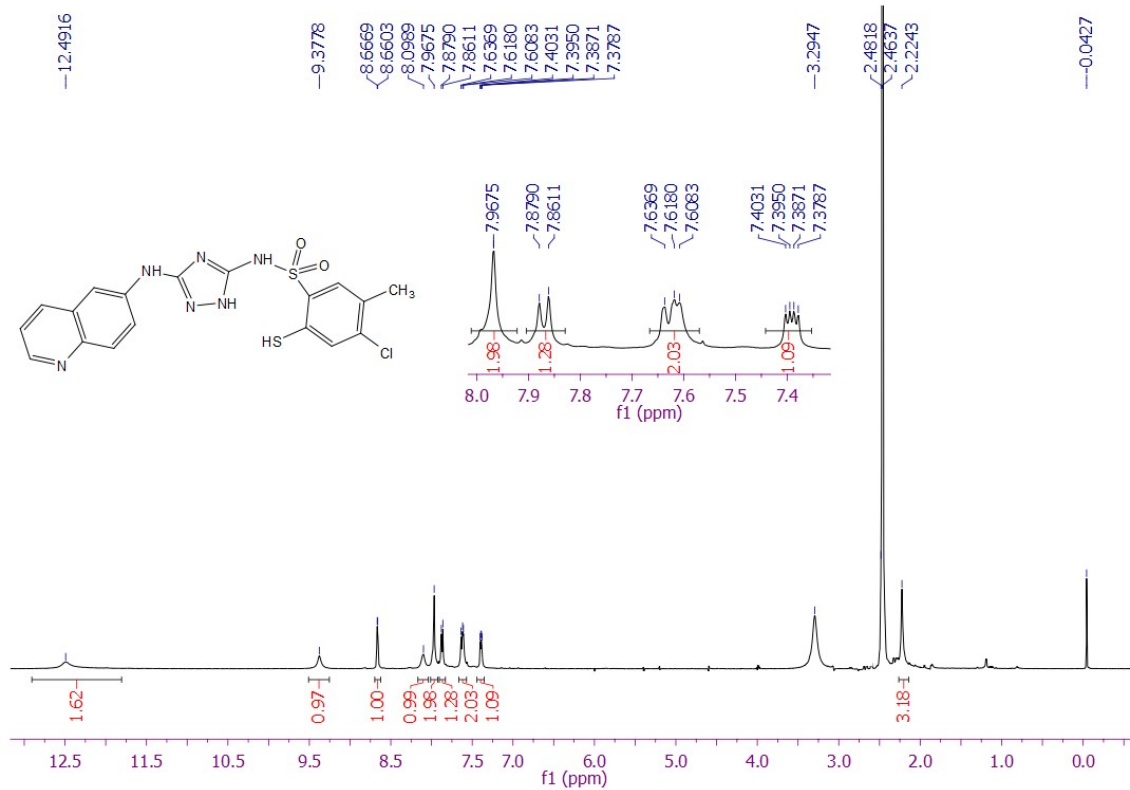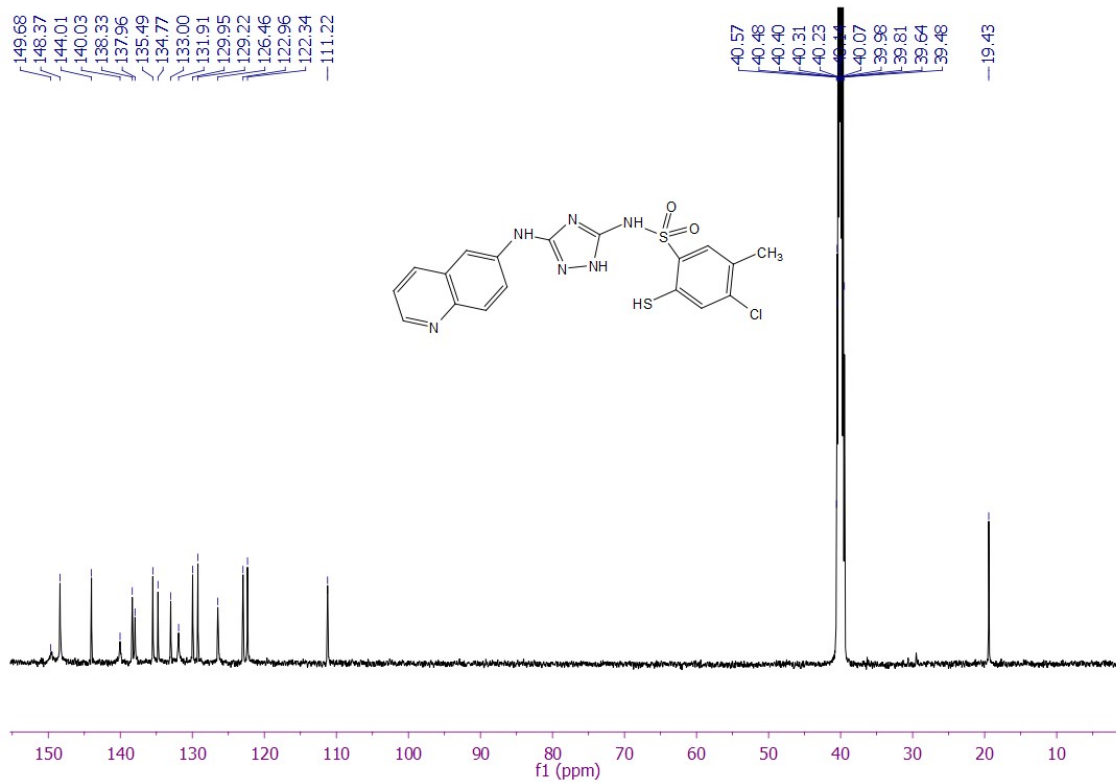

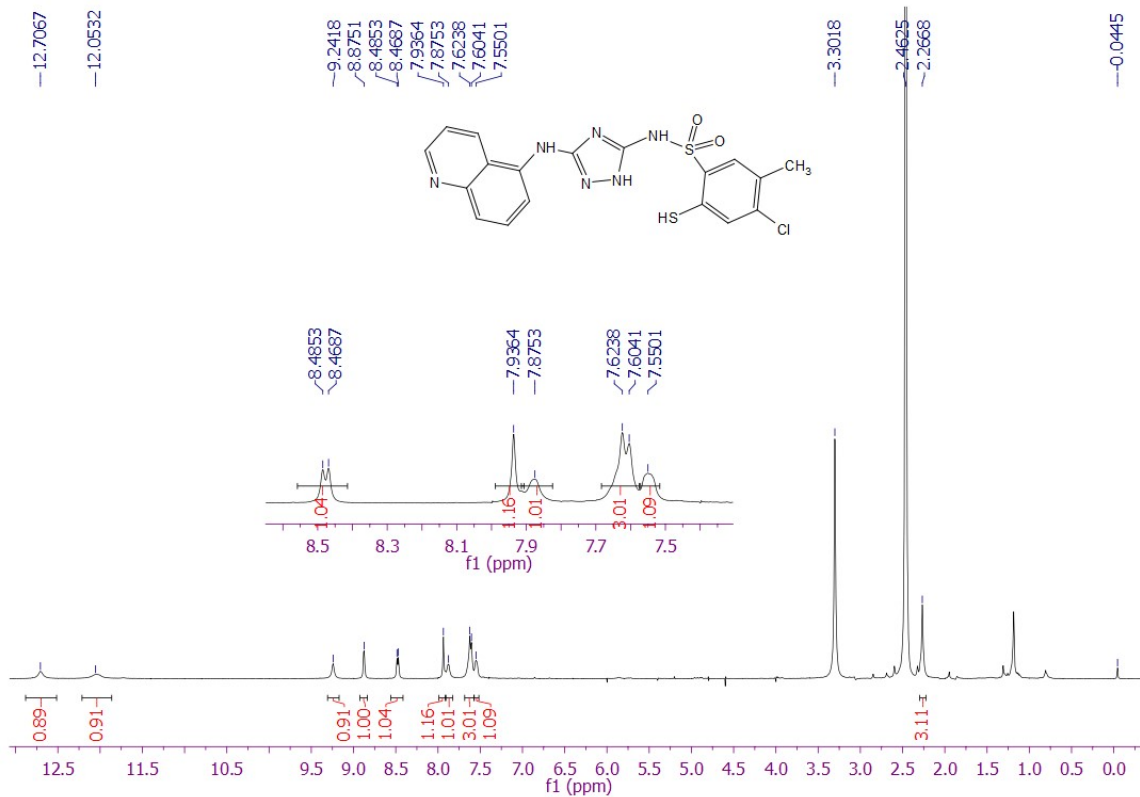

**Figure S76.** <sup>1</sup>H NMR spectrum of **11l** (500 MHz, DMSO-*d*<sub>6</sub>)

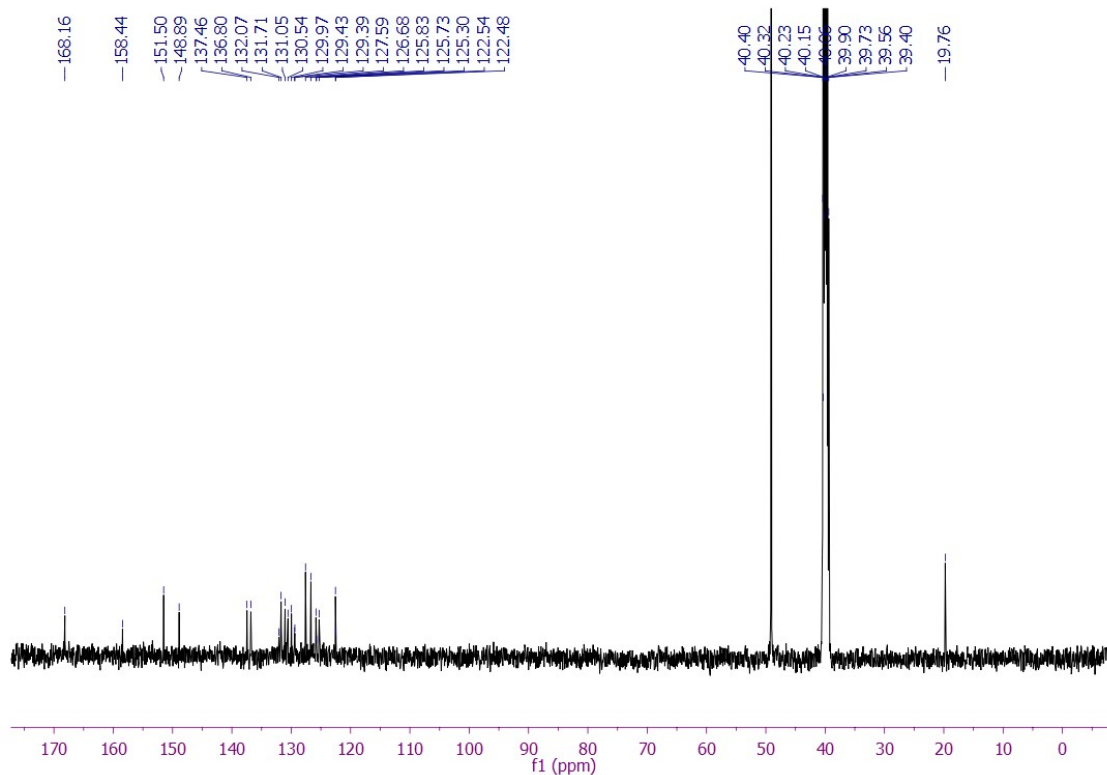

**Figure S77.** <sup>13</sup>C NMR spectrum of **11l** (126 MHz, DMSO-*d*<sub>6</sub>)



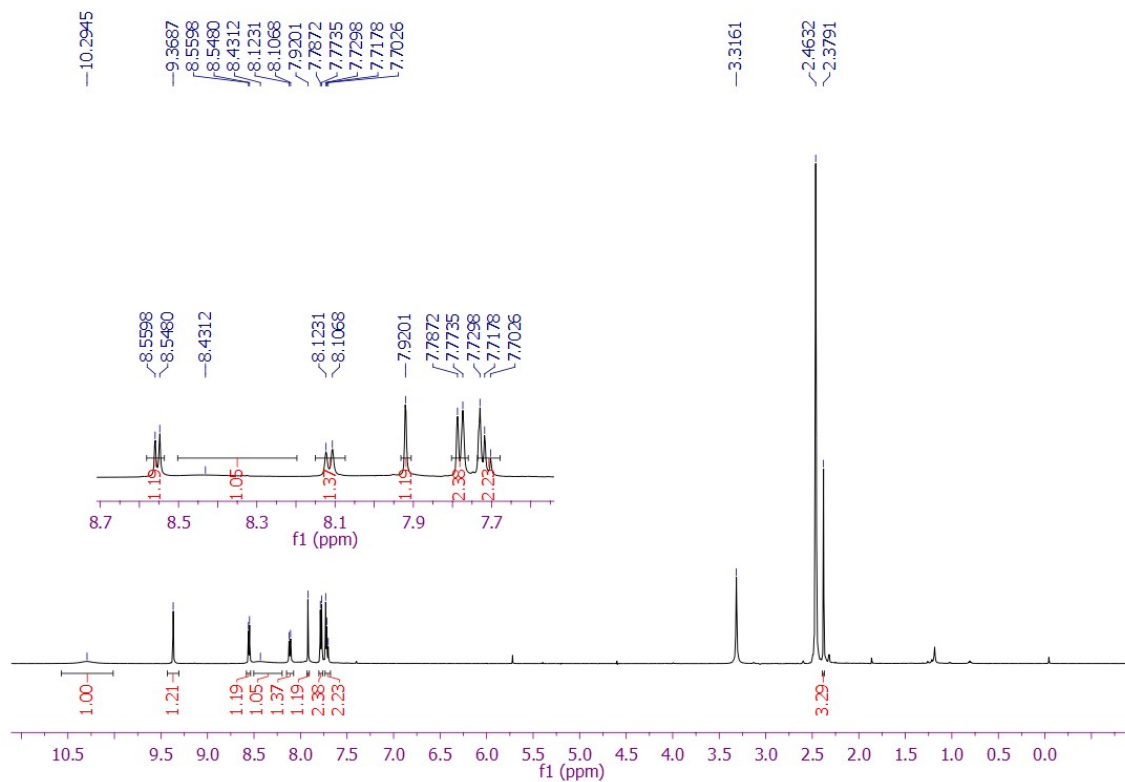

**Figure S78.**  $^1\text{H}$  NMR spectrum of **11m** (500 MHz,  $\text{DMSO-}d_6$ )

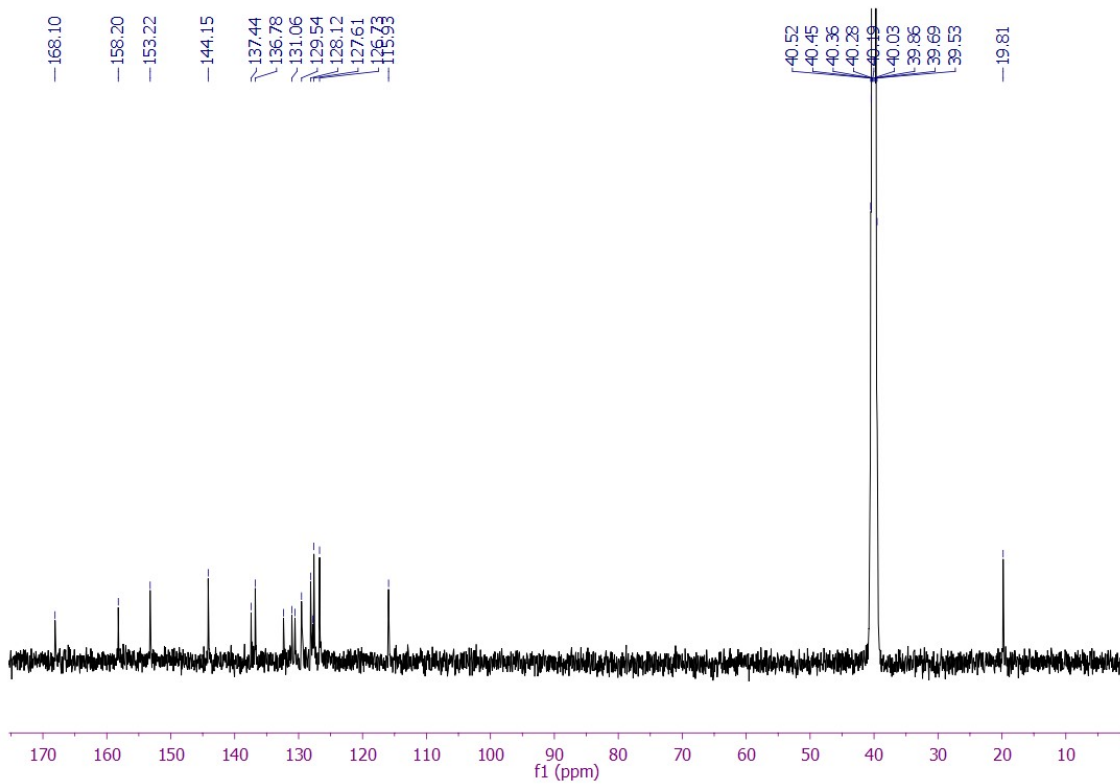

**Figure S79.**  $^{13}\text{C}$  NMR spectrum of **11m** (126 MHz,  $\text{DMSO-}d_6$ )

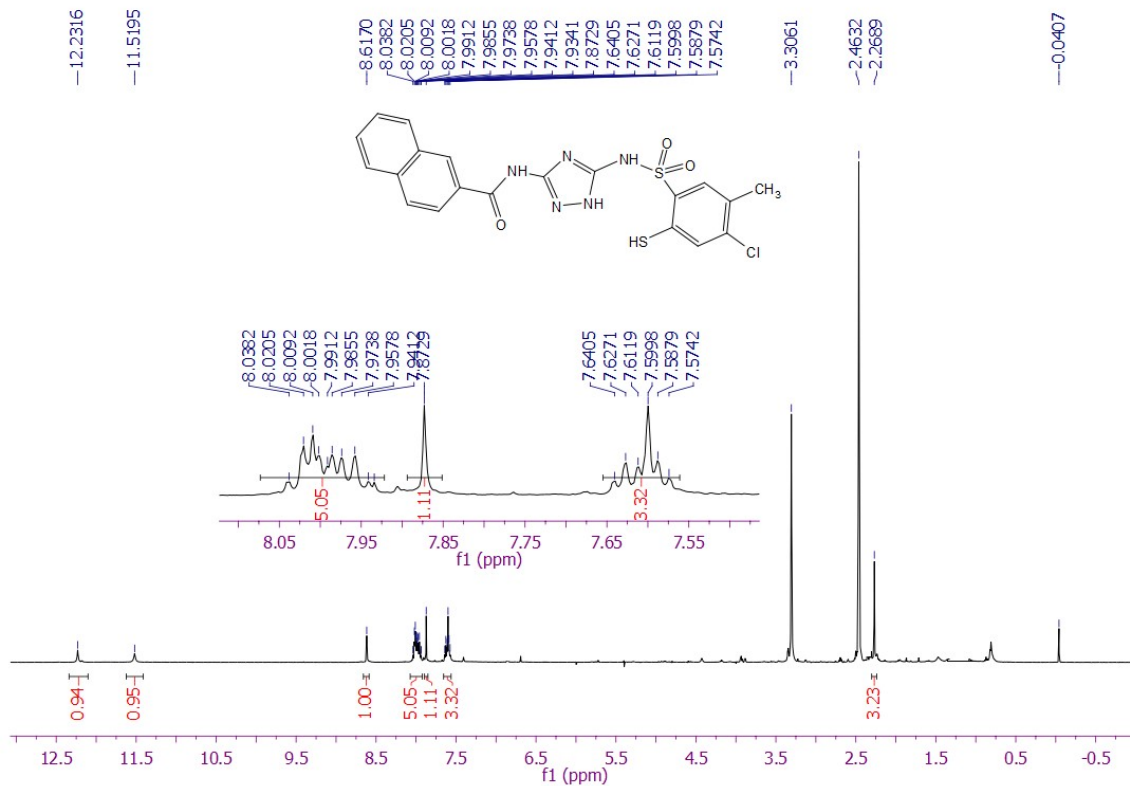

**Figure S80.** <sup>1</sup>H NMR spectrum of **11n** (500 MHz, DMSO-*d*<sub>6</sub>)

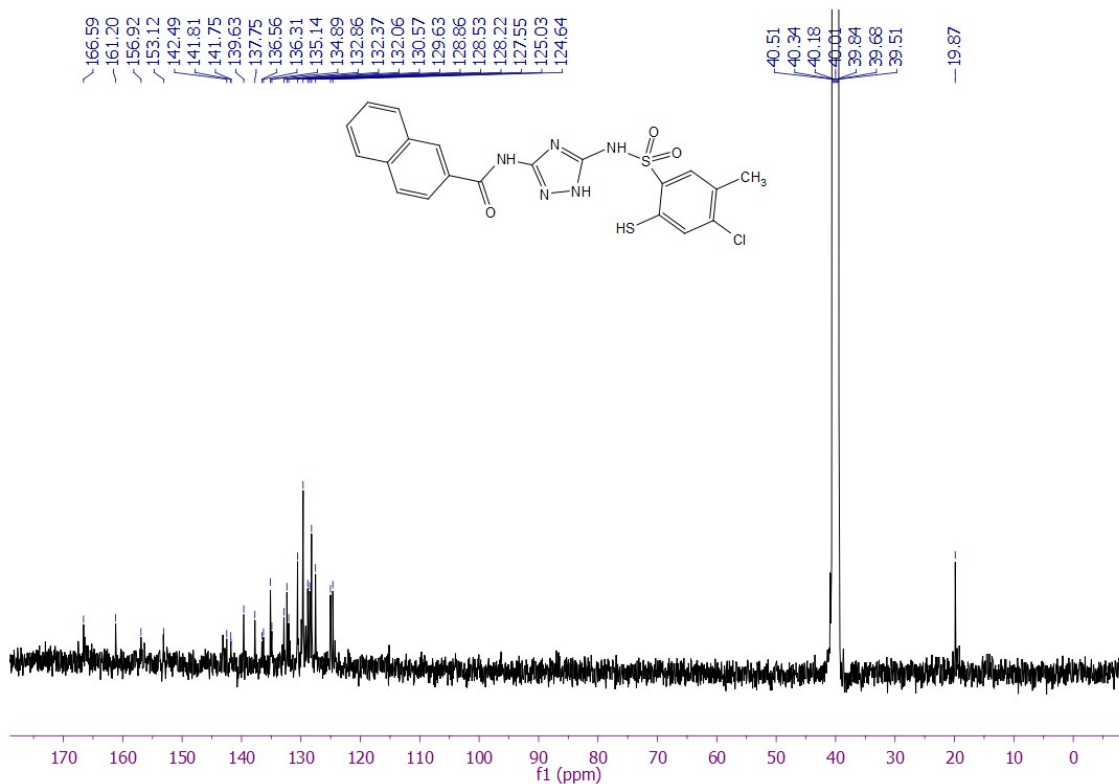

**Figure S81.** <sup>13</sup>C NMR spectrum of **11n** (126 MHz, DMSO-*d*<sub>6</sub>)

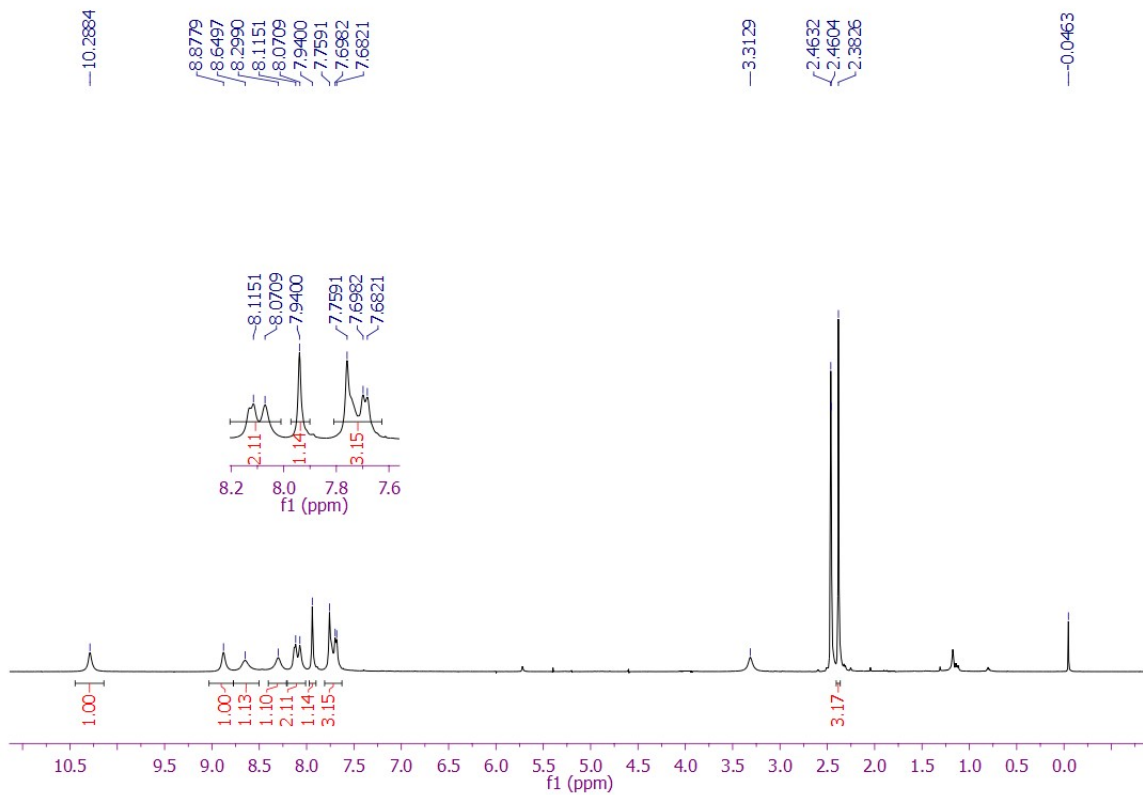

**Figure S82.**  $^1\text{H}$  NMR spectrum of **11o** (500 MHz,  $\text{DMSO-}d_6$ )

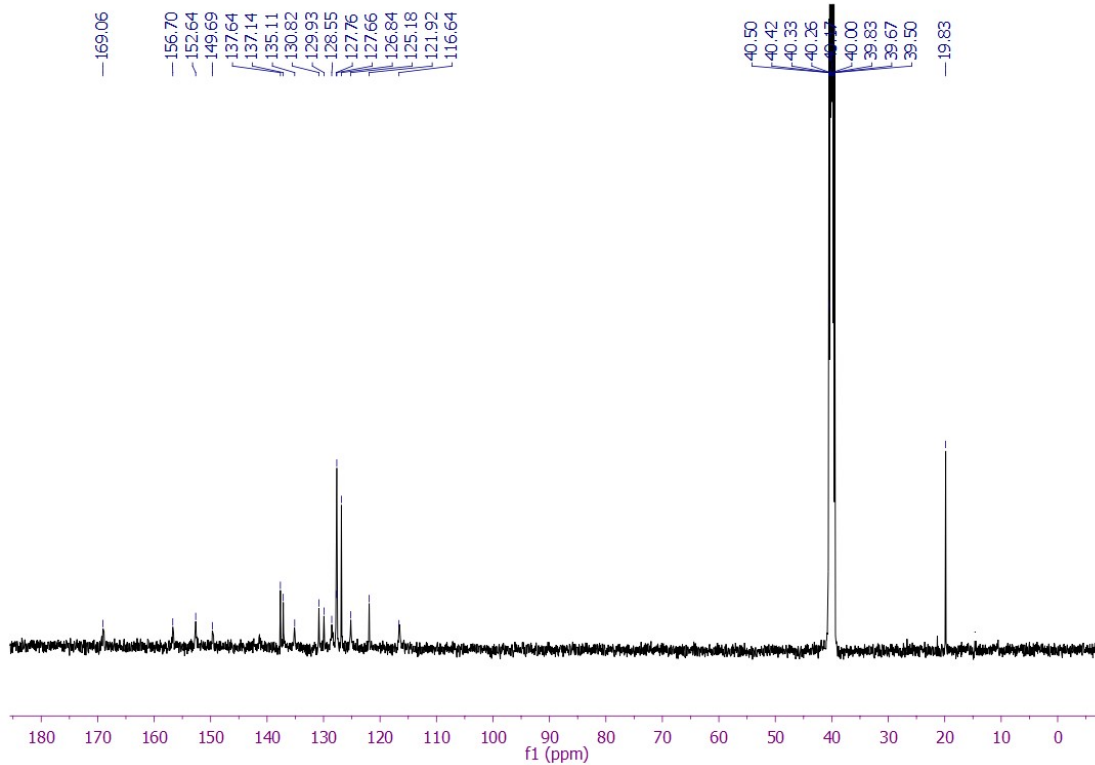

**Figure S83.**  $^{13}\text{C}$  NMR spectrum of **11o** (126 MHz,  $\text{DMSO-}d_6$ )

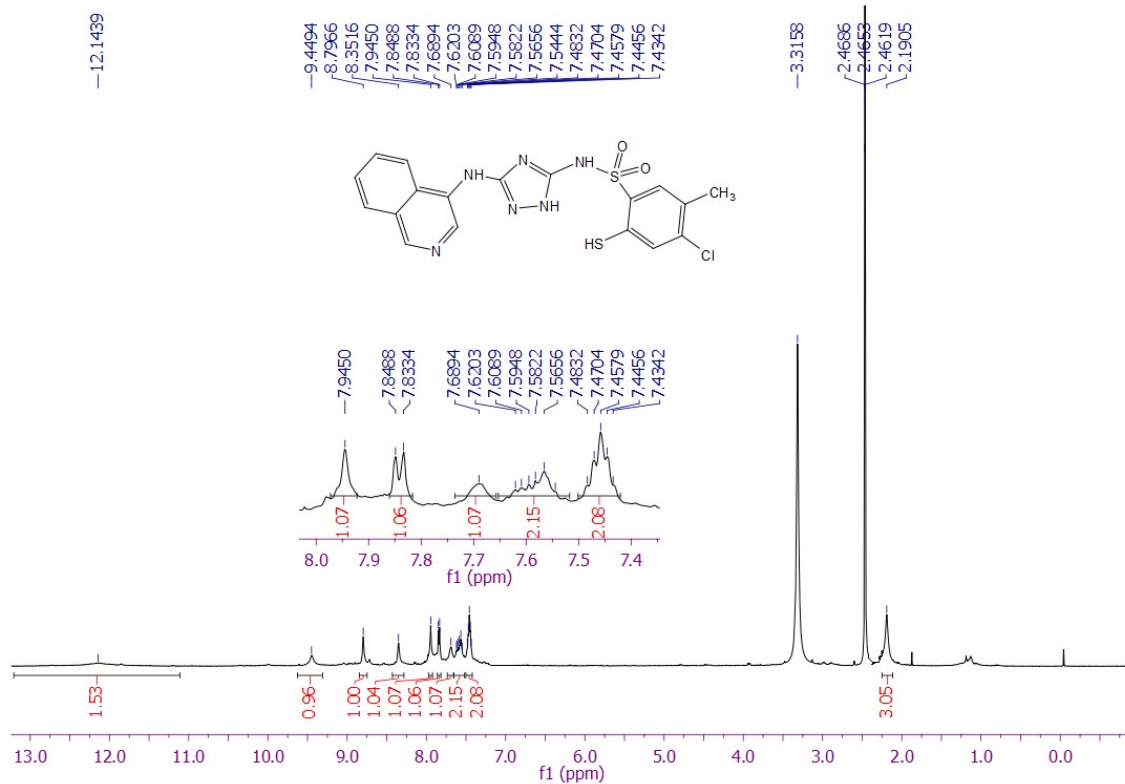

Figure S84. <sup>1</sup>H NMR spectrum of 11p (500 MHz, DMSO-*d*<sub>6</sub>)

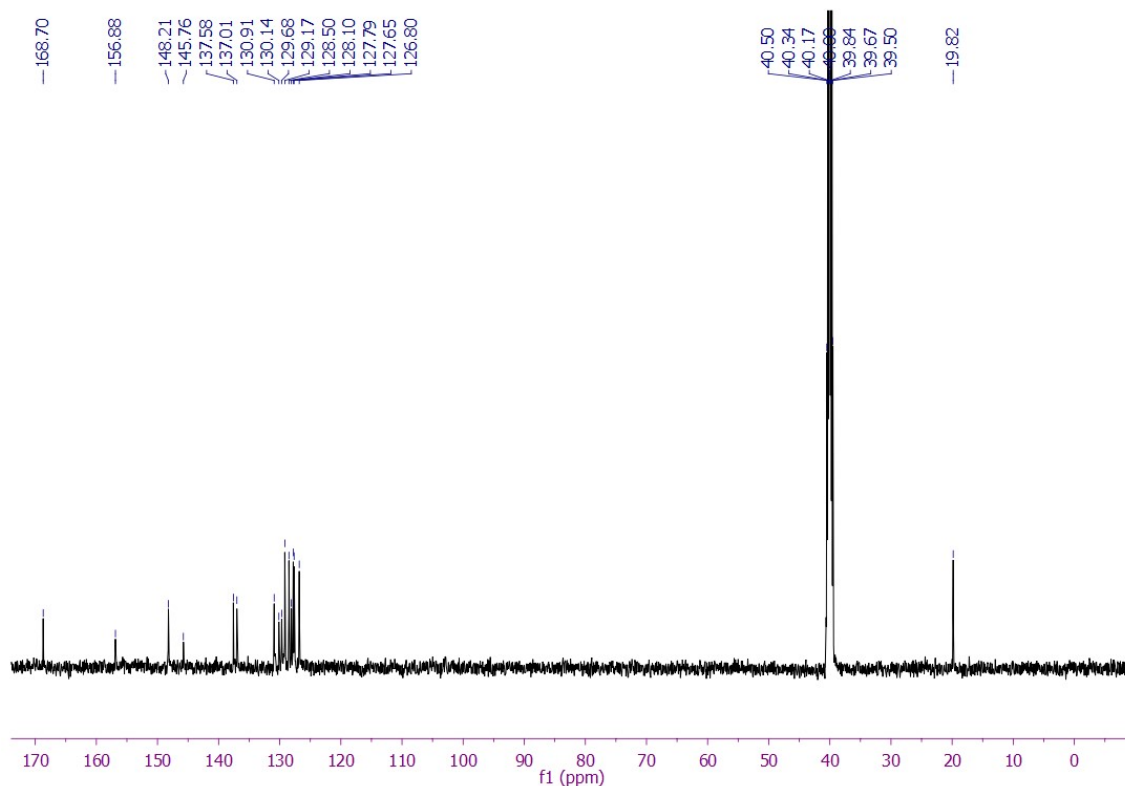

Figure S85. <sup>13</sup>C NMR spectrum of 11p (126 MHz, DMSO-*d*<sub>6</sub>)

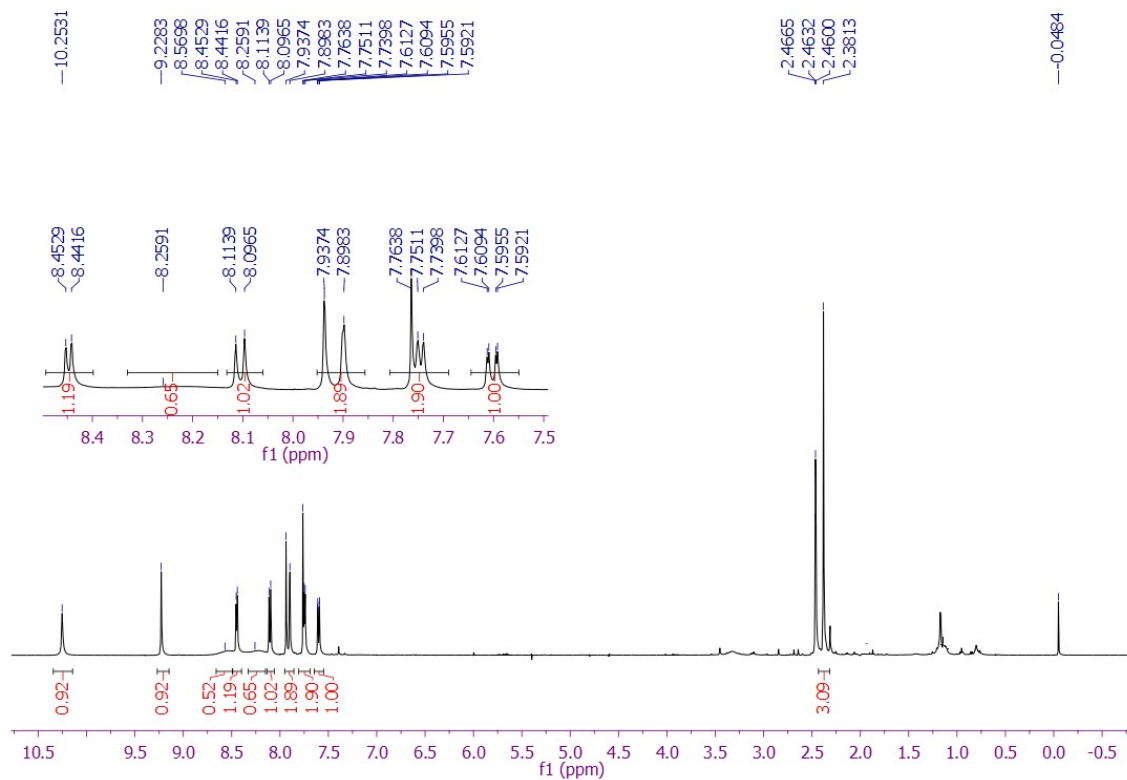

Figure S86.  $^1\text{H}$  NMR spectrum of **11q** (500 MHz,  $\text{DMSO-}d_6$ )

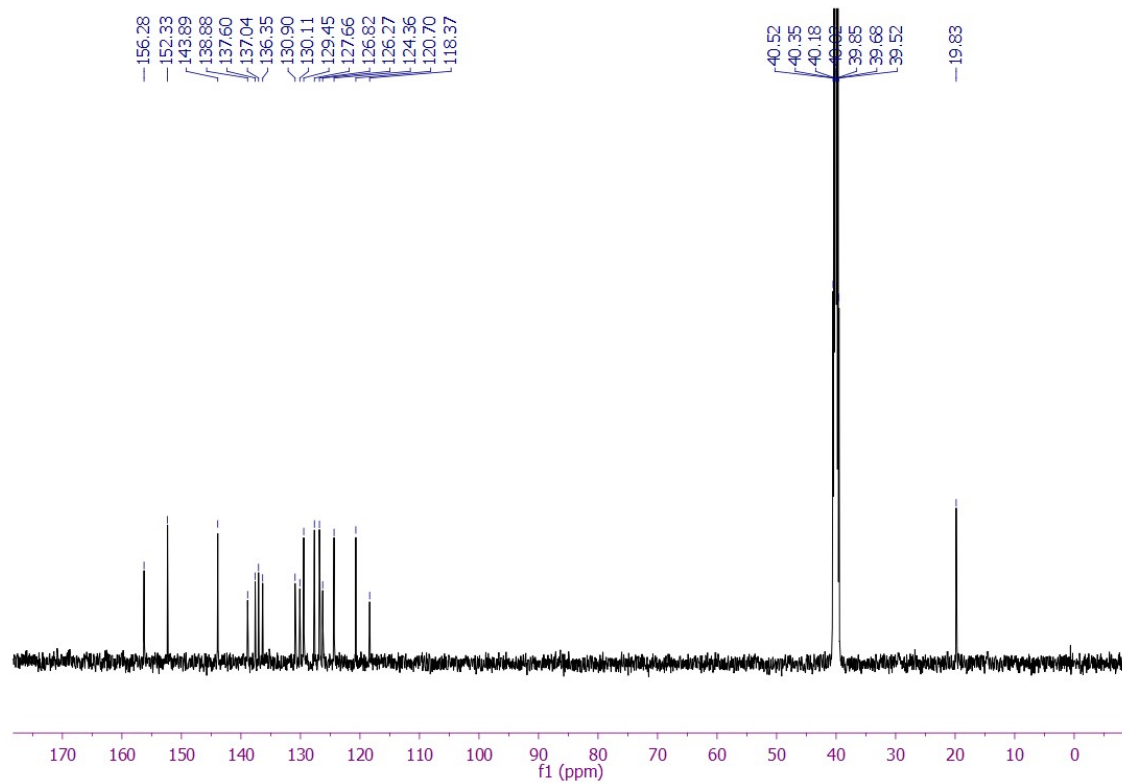

Figure S87.  $^{13}\text{C}$  NMR spectrum of **11q** (126 MHz,  $\text{DMSO-}d_6$ )

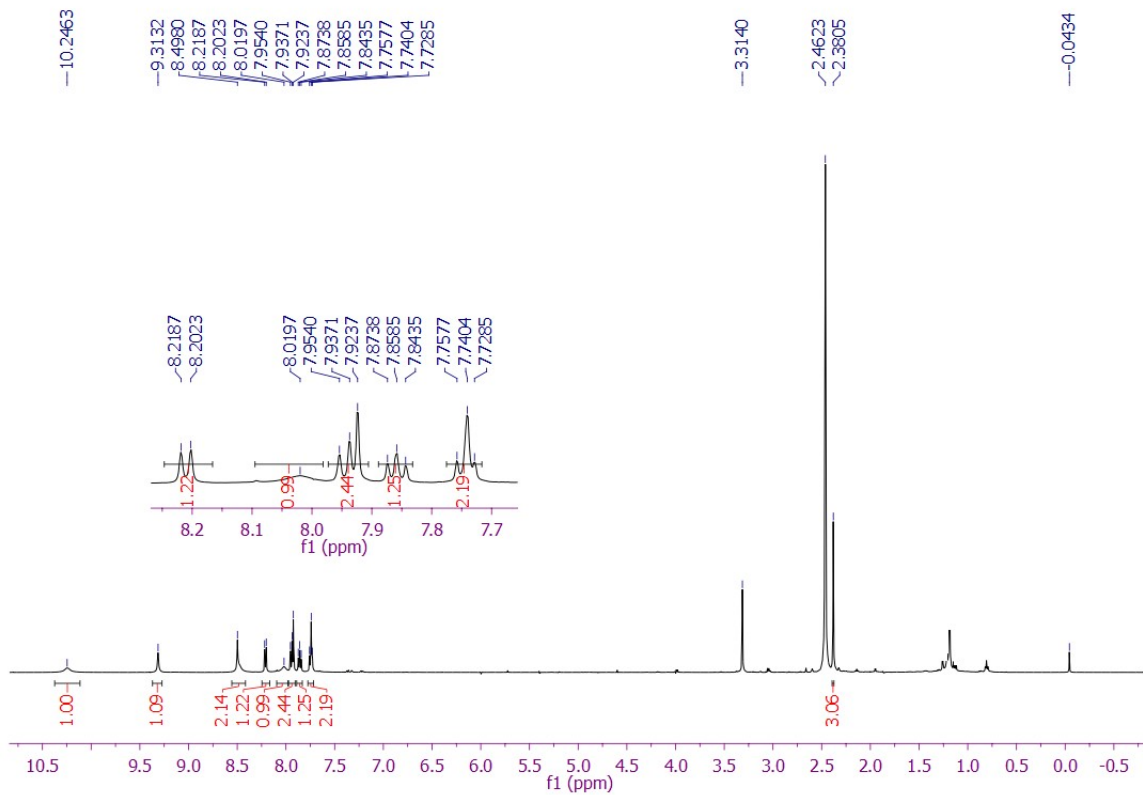

**Figure S88.**  $^1\text{H}$  NMR spectrum of **11r** (500 MHz,  $\text{DMSO-}d_6$ )

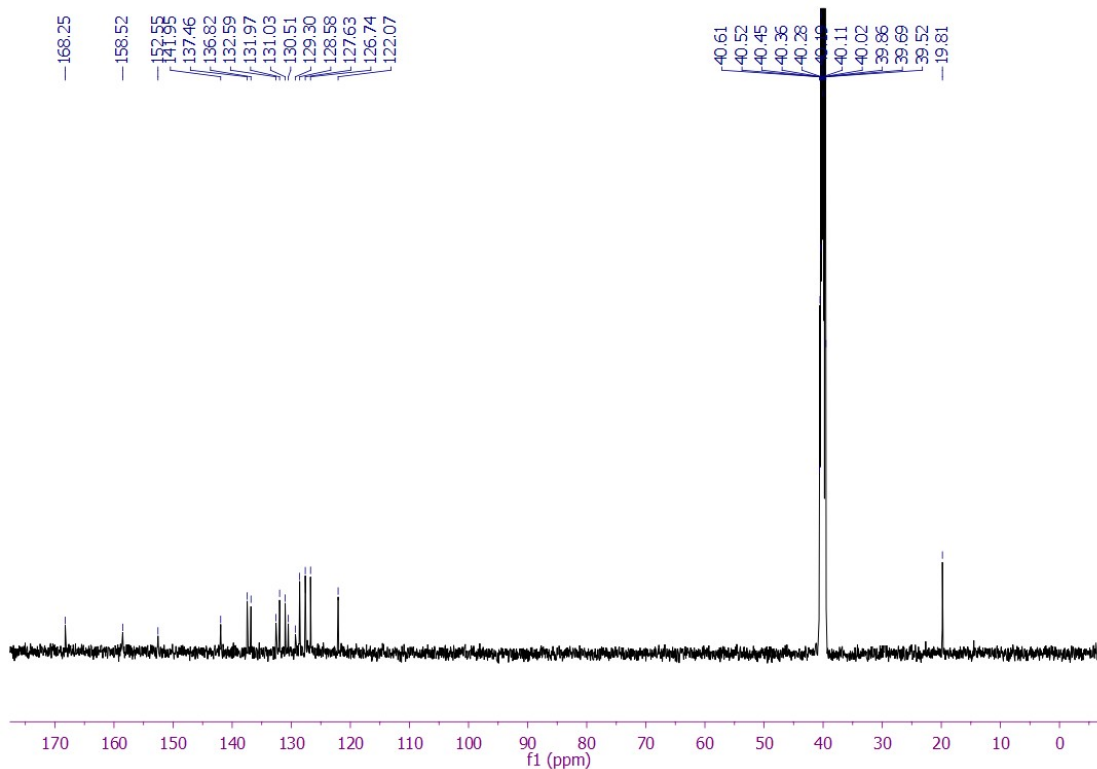

**Figure S89.**  $^{13}\text{C}$  NMR spectrum of **11r** (126 MHz,  $\text{DMSO-}d_6$ )

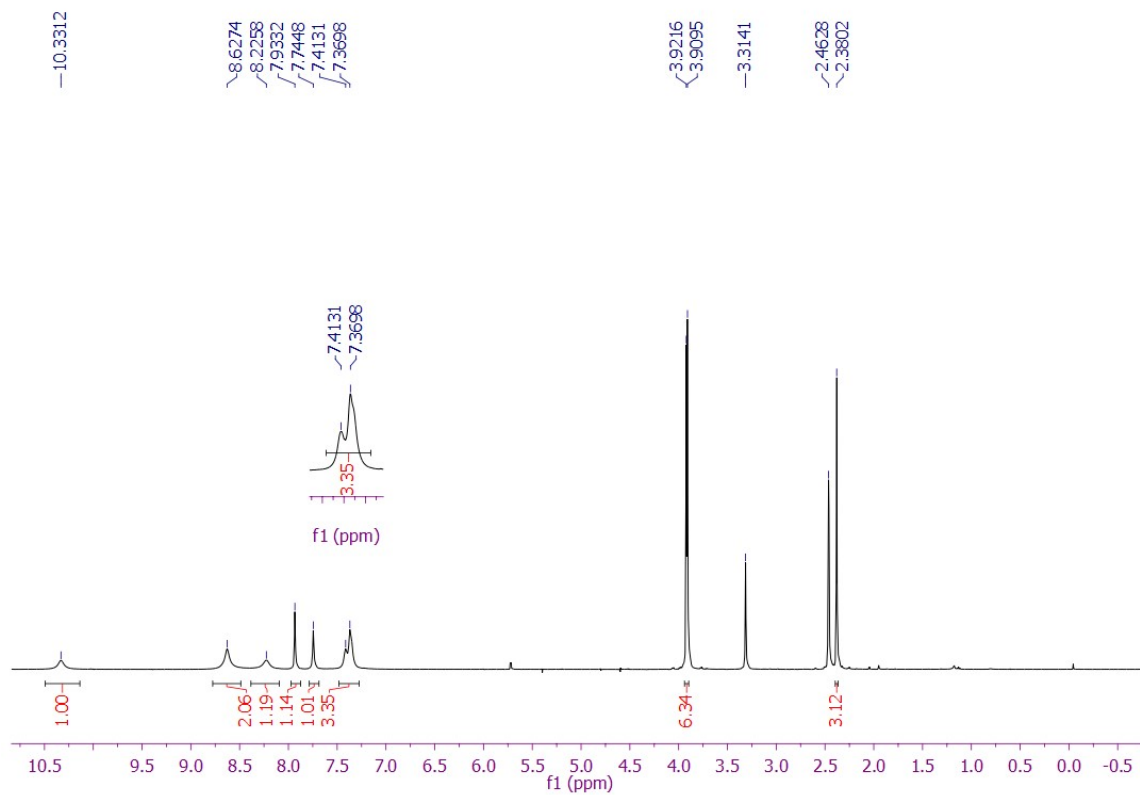

**Figure S90.**  $^1\text{H}$  NMR spectrum of **11s** (500 MHz,  $\text{DMSO-}d_6$ )

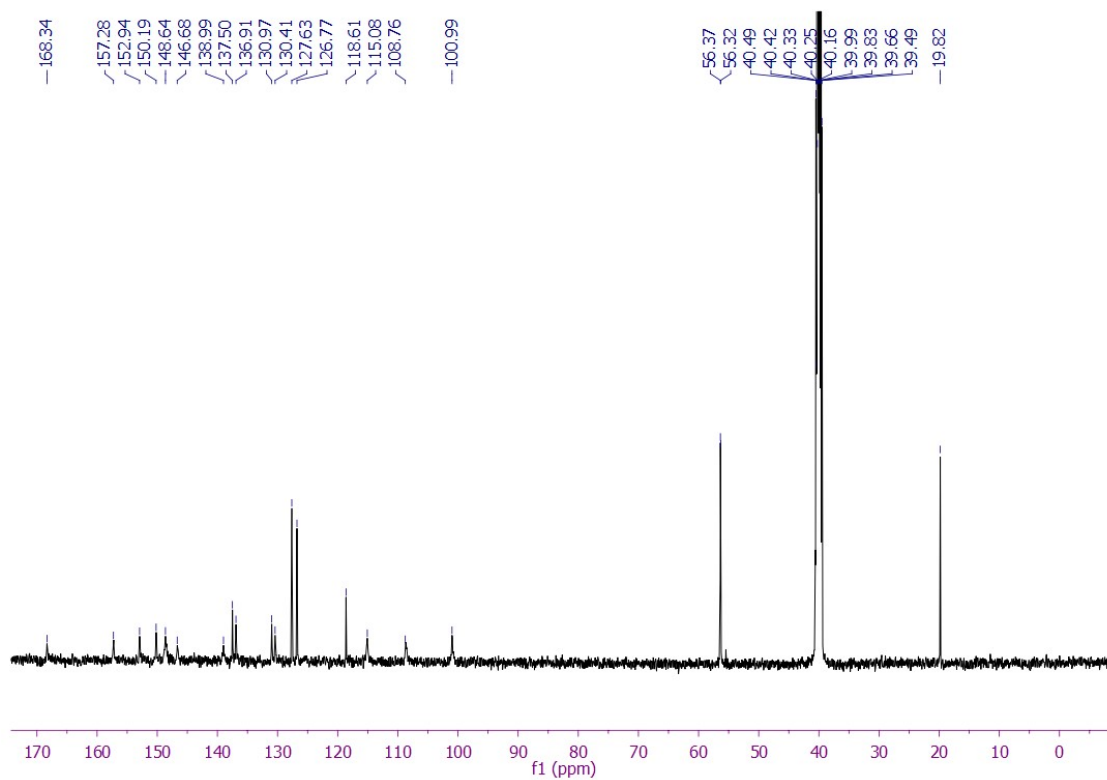

**Figure S91.**  $^{13}\text{C}$  NMR spectrum of **11s** (126 MHz,  $\text{DMSO-}d_6$ )

#### 4 HRMS (ESI+) Spectra of representative compounds (10a-z and 11a-s):

SpectrumIdString

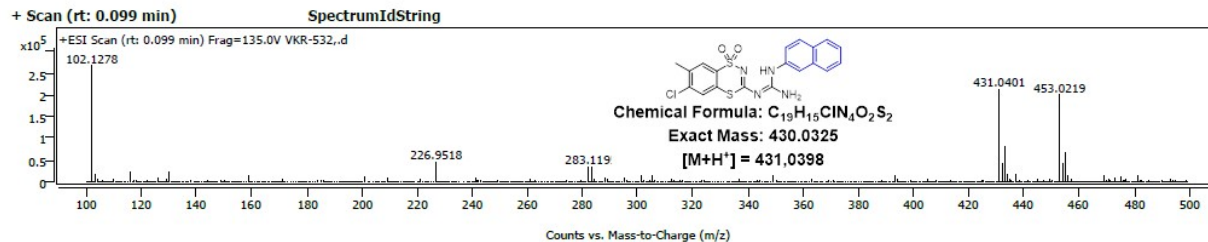

Figure S92. HRMS (ESI+) spectrum of 10a

SpectrumIdString

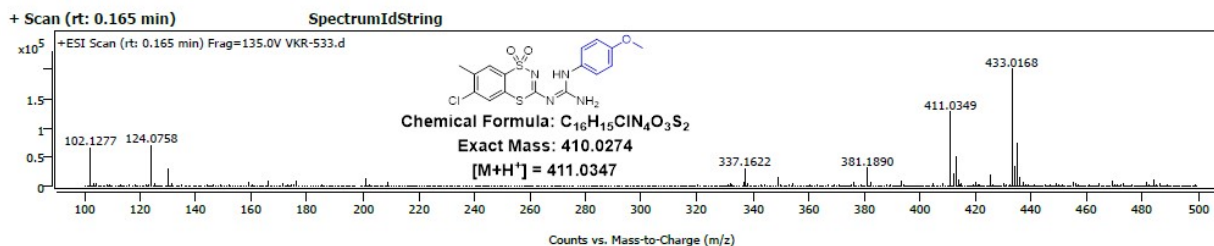

Figure S93. HRMS (ESI+) spectrum of 10b

SpectrumIdString

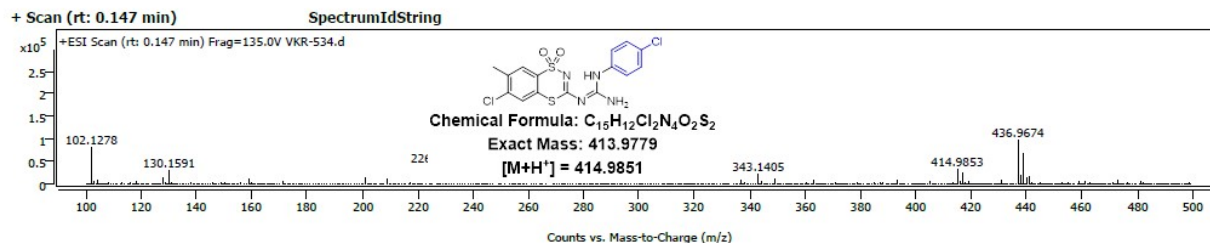

Figure S94. HRMS (ESI+) spectrum of 10c

SpectrumIdString

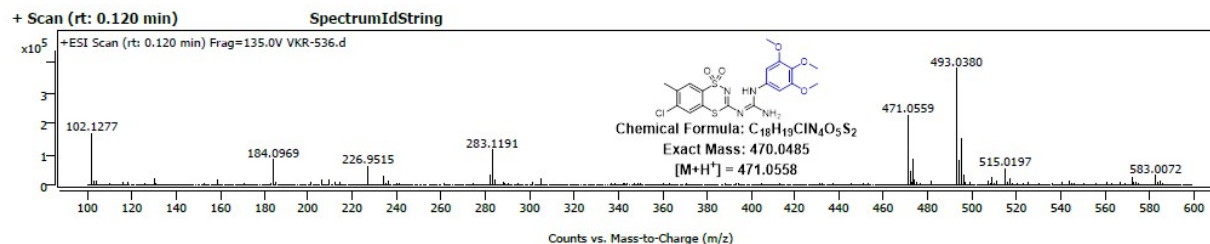

Figure S95. HRMS (ESI+) spectrum of 10d



SpectrumIdString

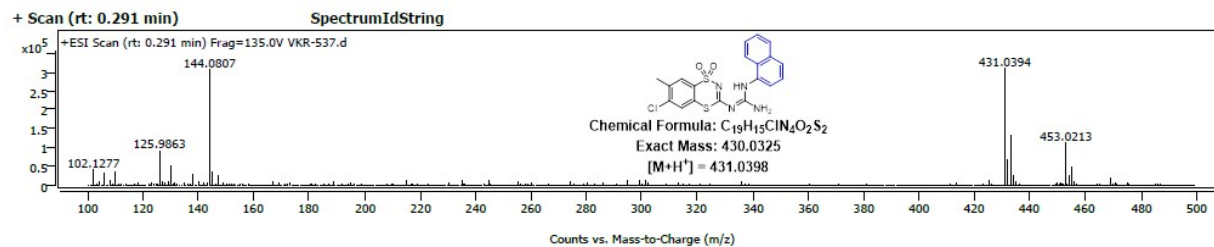

Figure S96. HRMS (ESI+) spectrum of 10e

SpectrumIdString

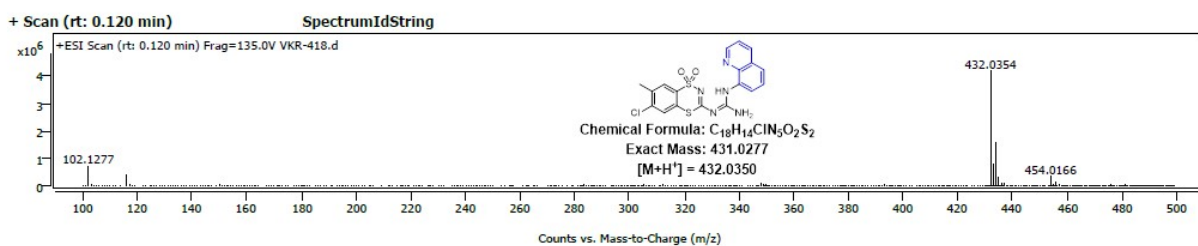

Figure S97. HRMS (ESI+) spectrum of 10f

Peak Spec

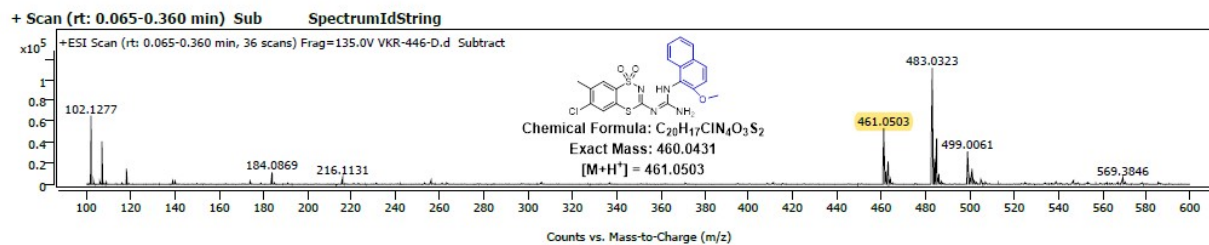

Figure S98. HRMS (ESI+) spectrum of 10g

SpectrumIdString

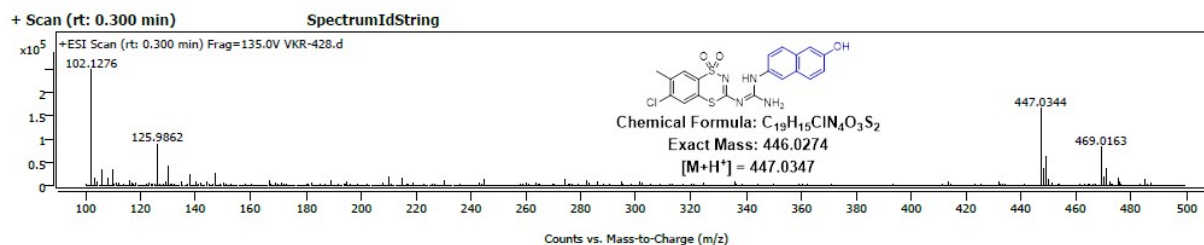

Figure S99. HRMS (ESI+) spectrum of 10h

SpectrumIdString

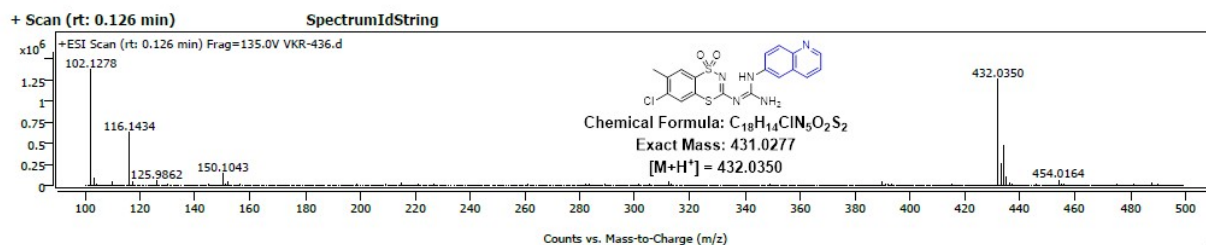

Figure S100. HRMS (ESI+) spectrum of 10i

SpectrumIdString

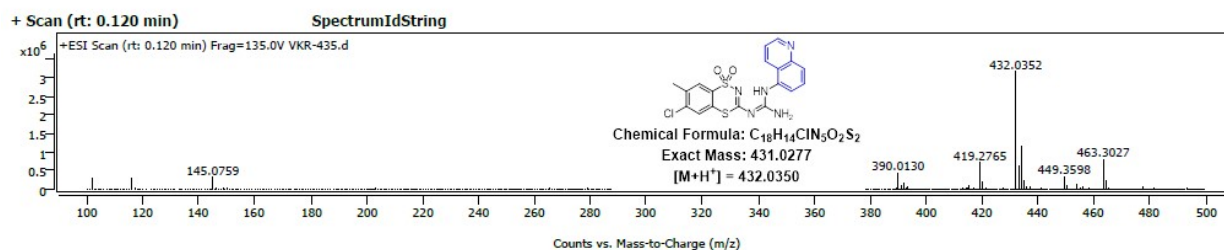

Figure S101. HRMS (ESI+) spectrum of 10j

SpectrumIdString

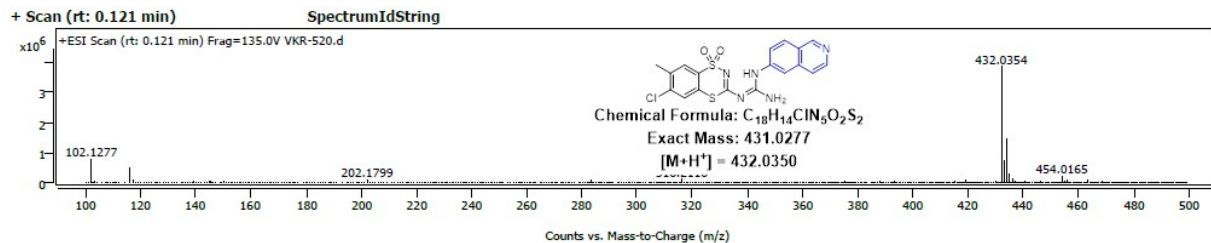

Figure S102. HRMS (ESI+) spectrum of 10k

SpectrumIdString

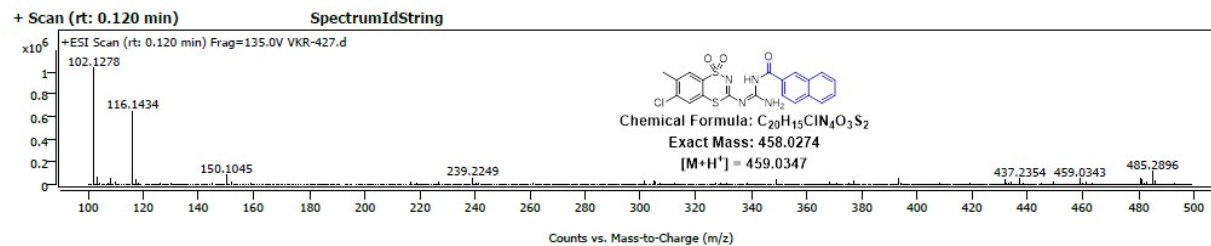

Figure S103. HRMS (ESI+) spectrum of 10l

SpectrumIdString

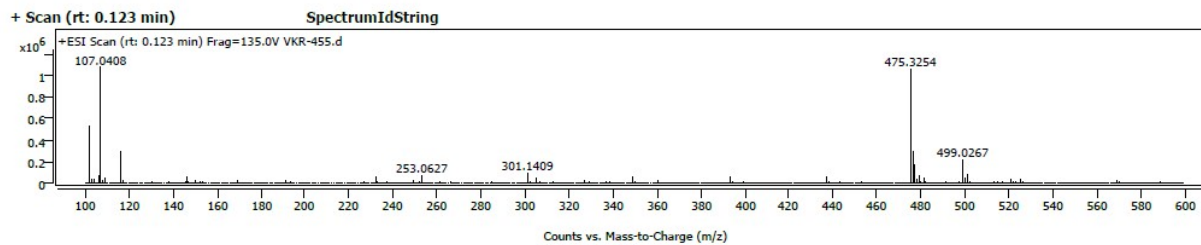

Spectrum Peaks

| m/z      | Z | Abund   | Abund % | m/z (Calc) | Diff (ppm) | Ion Species | Formula | Ion Type |
|----------|---|---------|---------|------------|------------|-------------|---------|----------|
| 102.1277 |   | 532637  | 49.67   |            |            |             |         |          |
| 107.0408 |   | 1072279 | 100.00  |            |            |             |         |          |
| 116.1434 |   | 291563  | 27.19   |            |            |             |         |          |
| 253.0627 |   | 73967   | 6.90    |            |            |             |         |          |
| 301.1409 |   | 94082   | 8.77    |            |            |             |         |          |
| 475.3254 | 1 | 1057533 | 98.62   |            |            |             |         |          |
| 476.3283 | 1 | 287842  | 26.84   |            |            |             |         |          |
| 477.0448 |   | 165495  | 15.43   |            |            |             |         |          |
| 499.0267 |   | 213024  | 19.87   |            |            |             |         |          |
| 501.0237 |   | 78919   | 7.36    |            |            |             |         |          |

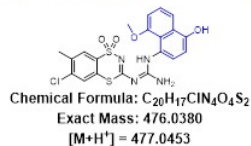

Figure S104. HRMS (ESI+) spectrum of 10m

SpectrumIdString

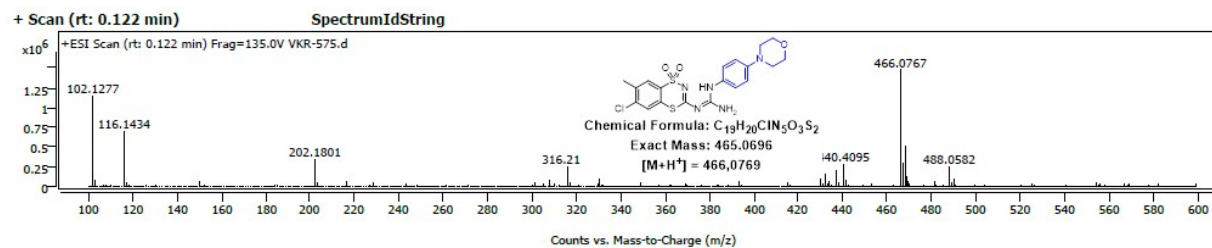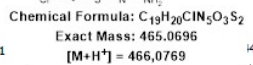

Figure S105. HRMS (ESI+) spectrum of 10n

SpectrumIdString

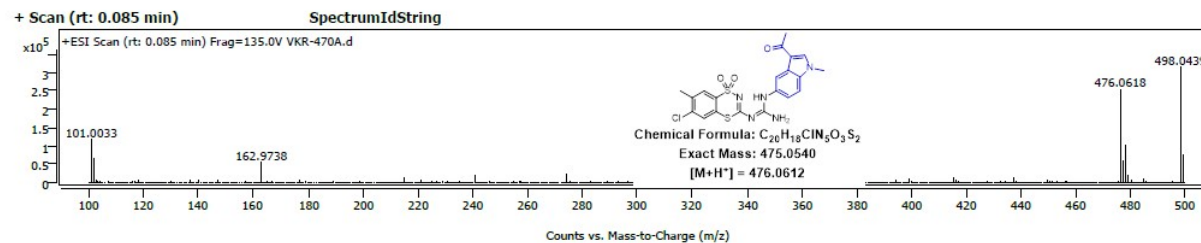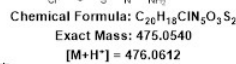

Figure S106. HRMS (ESI+) spectrum of 10o

# Spectrum Plot Report

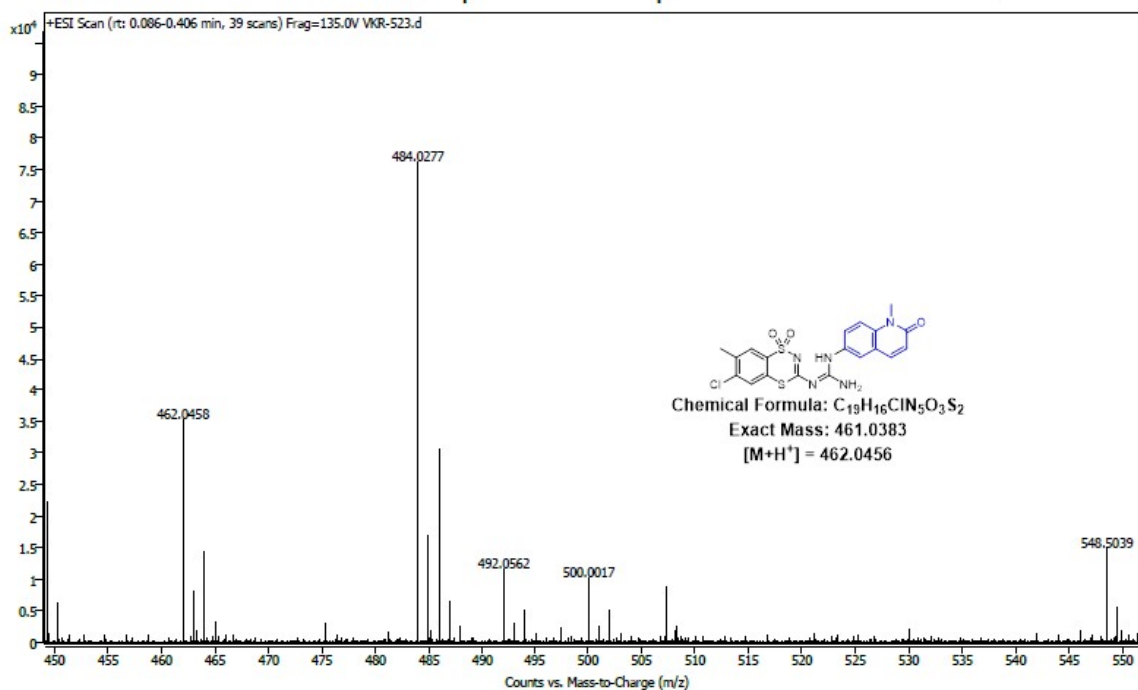

Figure S107. HRMS (ESI+) spectrum of 10p

## SpectrumIdString

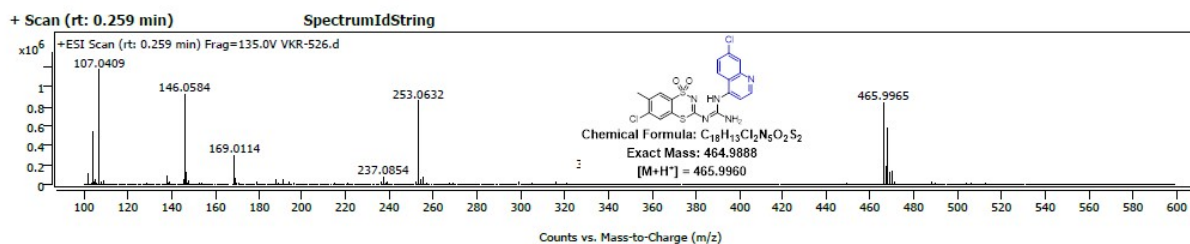

Figure S108. HRMS (ESI+) spectrum of 10q

## SpectrumIdString

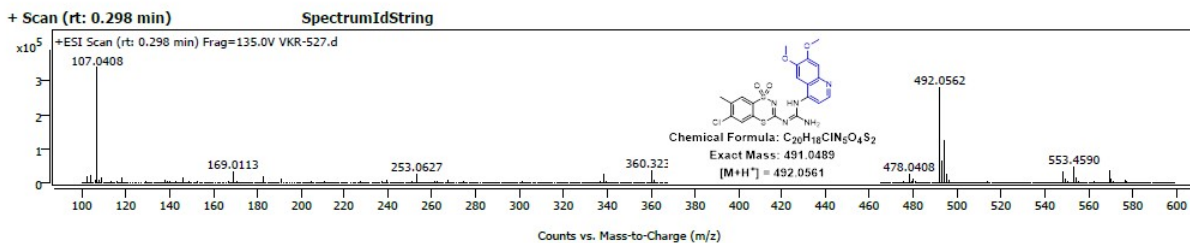

Figure S109. HRMS (ESI+) spectrum of 10r

### Spectrum Plot Report

Agilent | Trust Your Analysis

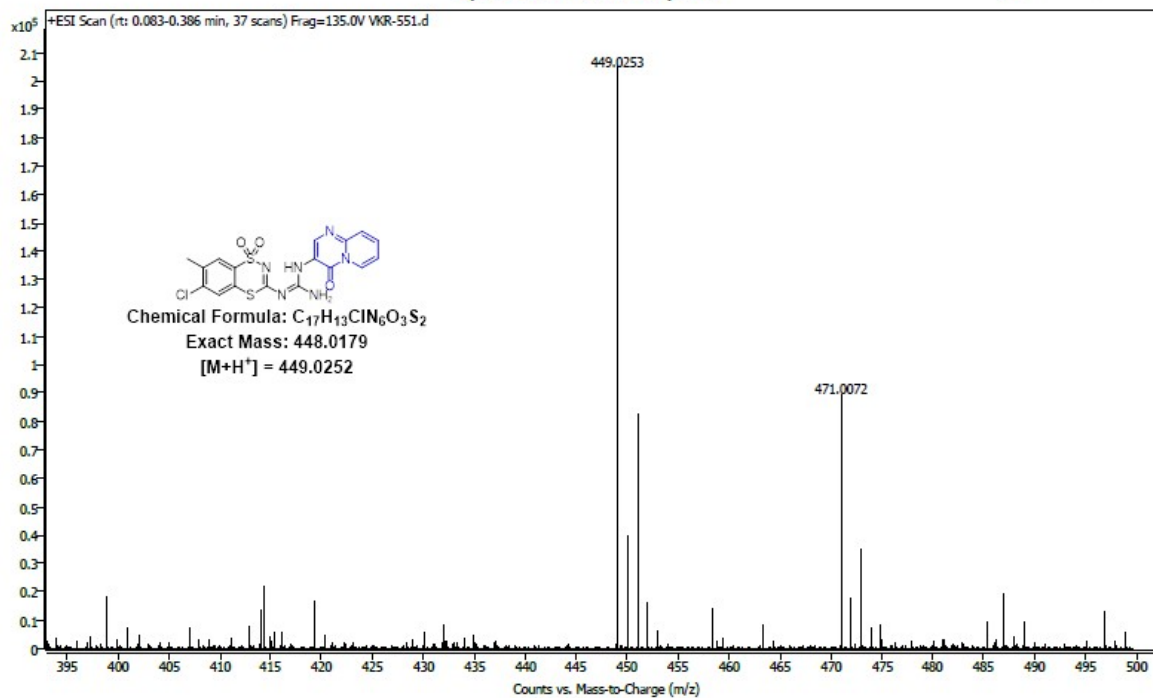

Figure S110. HRMS (ESI+) spectrum of 10s

### Spectrum Plot Report

Agilent | Trust Your Analysis

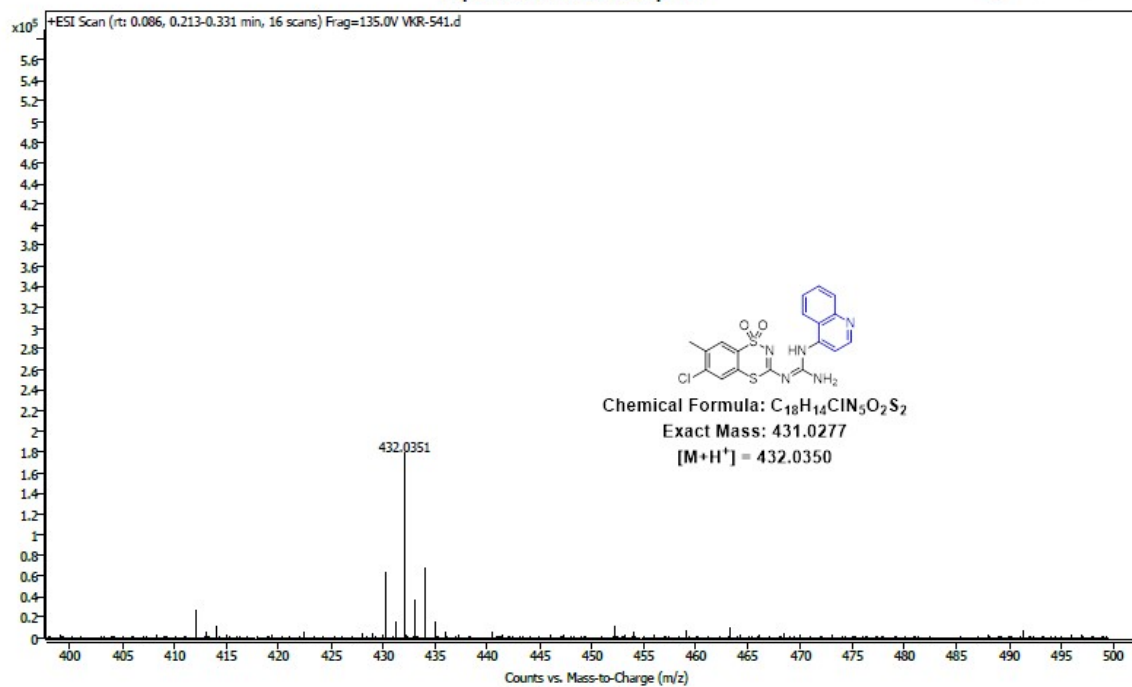

Figure S111. HRMS (ESI+) spectrum of 10t

### Spectrum Plot Report

Agilent | ToxLab Systems

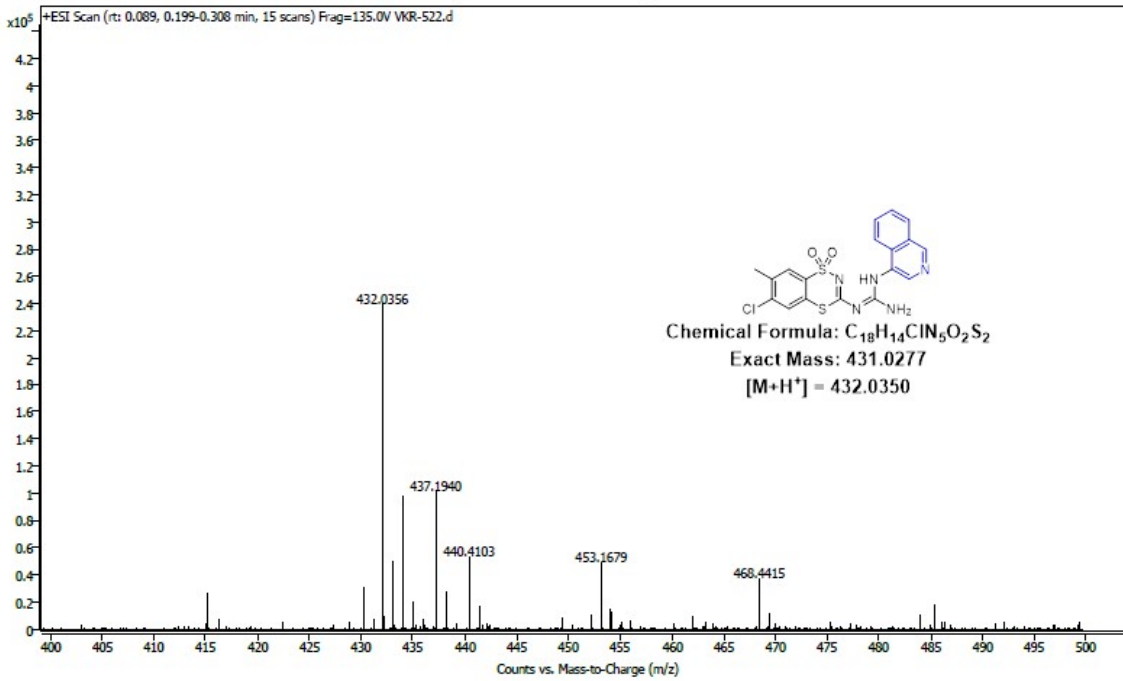

Figure S112. HRMS (ESI+) spectrum of 10u

### SpectrumIdString

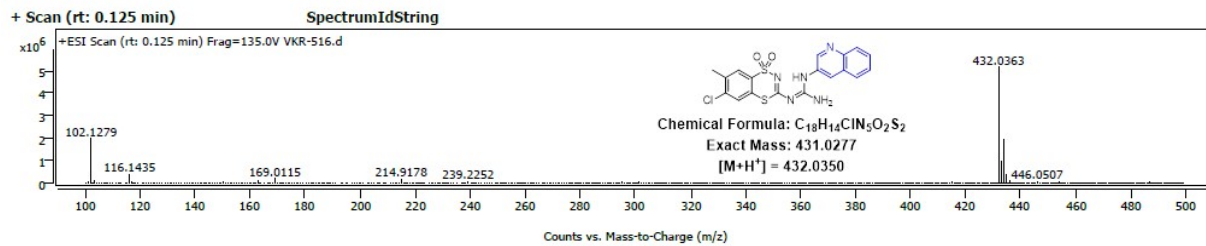

Figure S113. HRMS (ESI+) spectrum of 10v

### SpectrumIdString

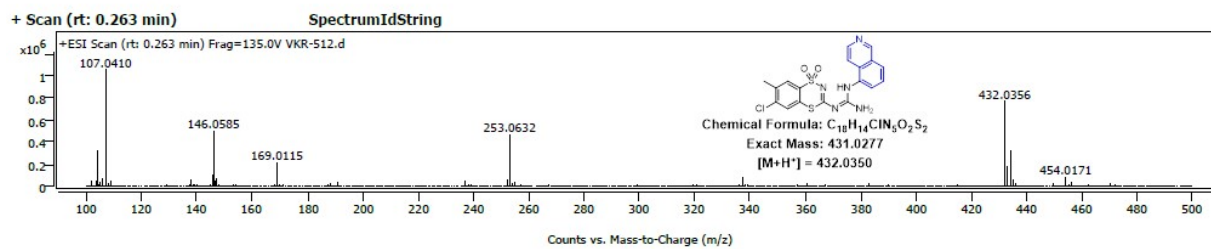

Figure S114. HRMS (ESI+) spectrum of 10w

### SpectrumIdString

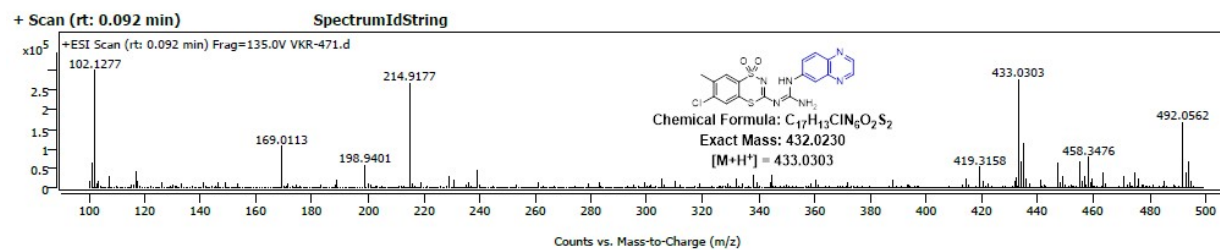

Figure S115. HRMS (ESI+) spectrum of **10x**

### Spectrum Plot Report

Agilent | Insight Answers

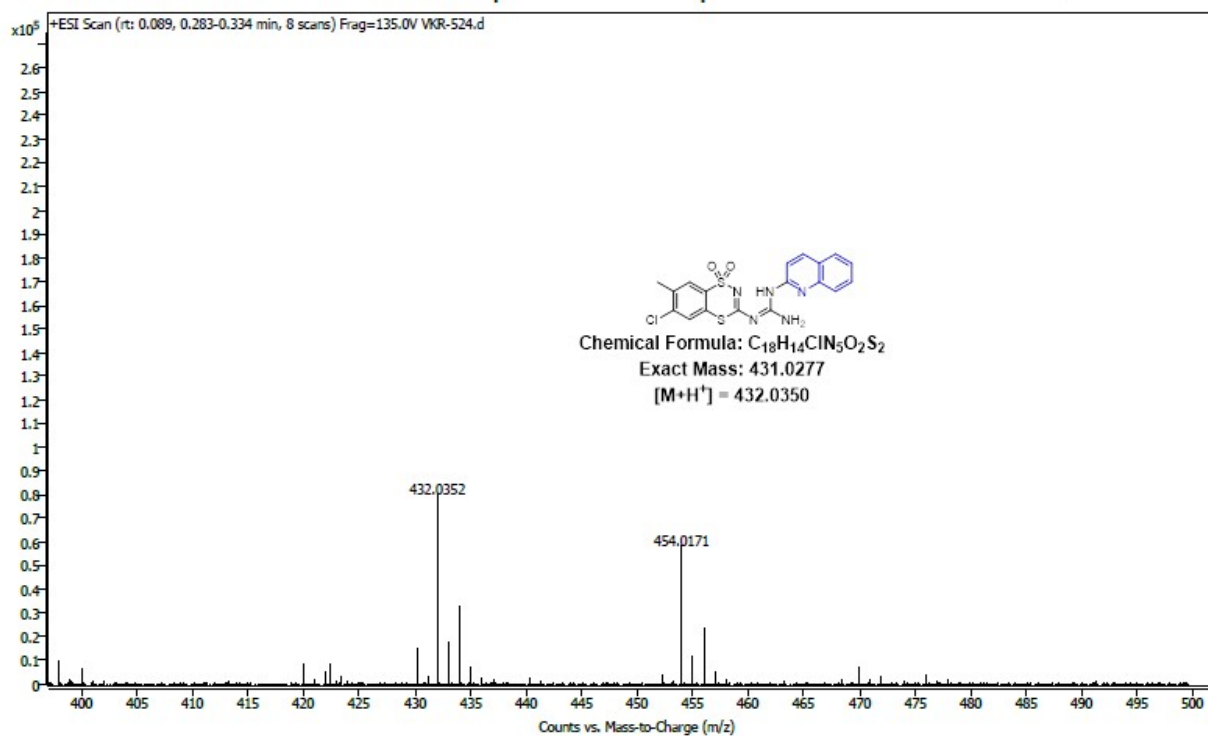

Figure S116. HRMS (ESI+) spectrum of **10y**

### Spectrum Plot Report

Agilent | Toxin Analysis

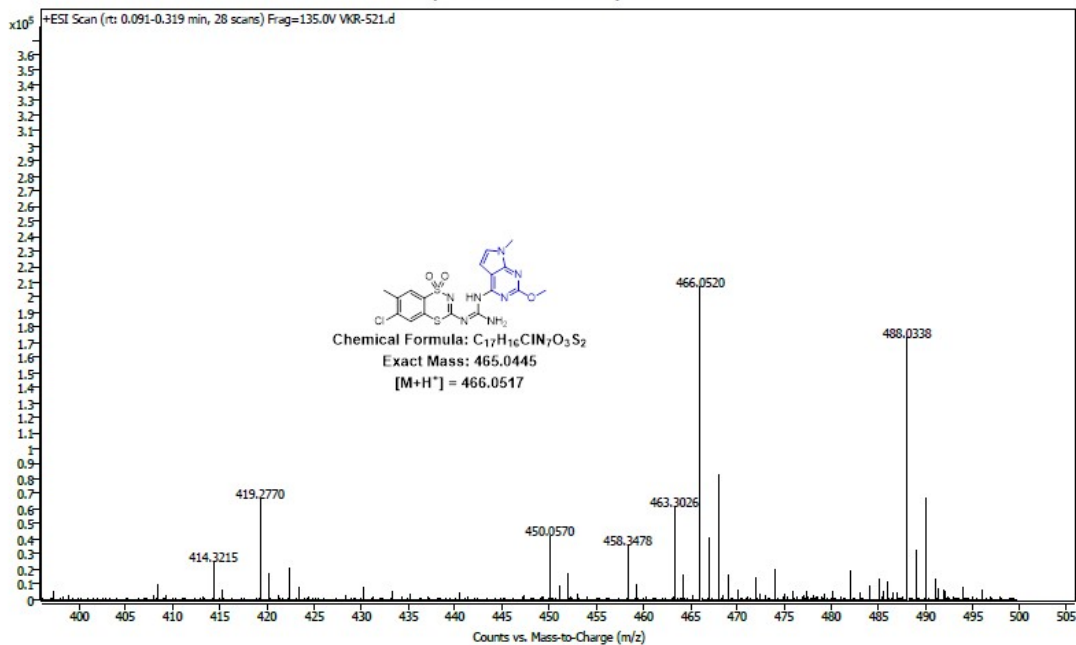

Figure S117. HRMS (ESI+) spectrum of **10z**

10102018\_2642\_SAM-10

10102018\_2642\_SAM-10 37 (0.742) AM2 (Ar,18000.0,0.00,0.00)

1: TOF MS ES+  
2.77e4

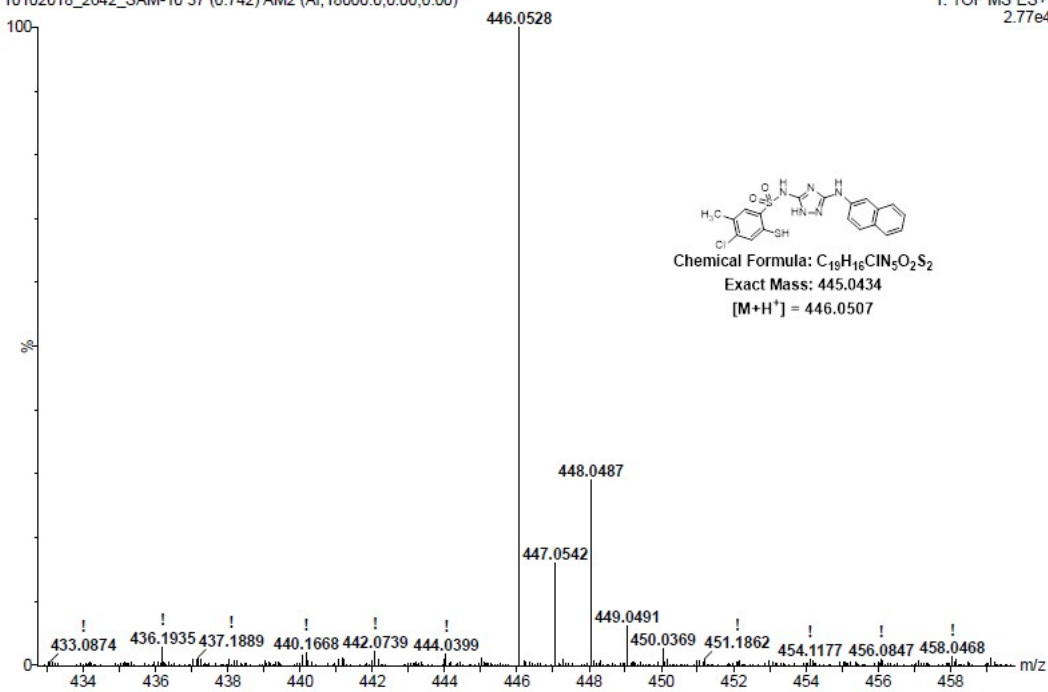

Figure S118. HRMS (ESI+) spectrum of NSC-666719 (**11a**)



SpectrumIdString

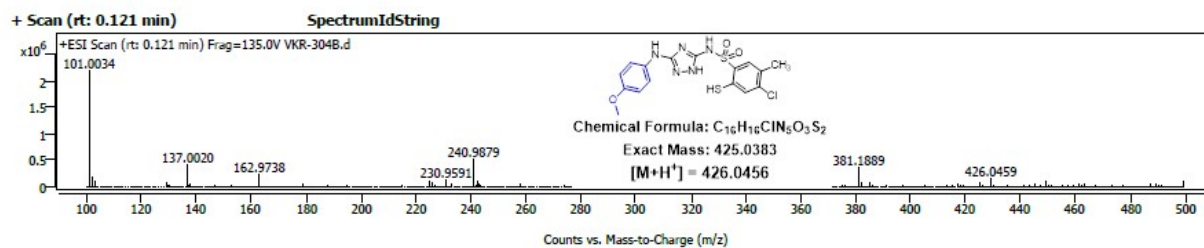

Figure S119. HRMS (ESI+) spectrum of 11b

SpectrumIdString

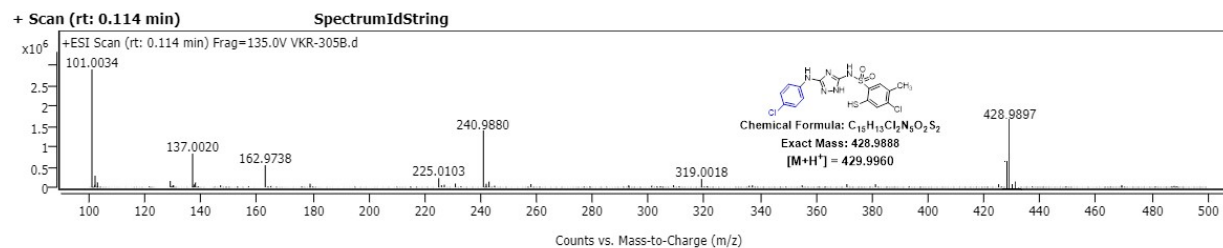

Figure S120. HRMS (ESI+) spectrum of 11c

SpectrumIdString

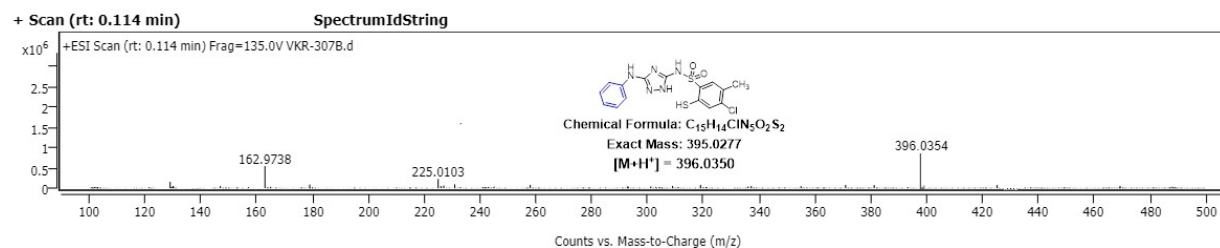

Figure S121. HRMS (ESI+) spectrum of 11d

Sample Spectra

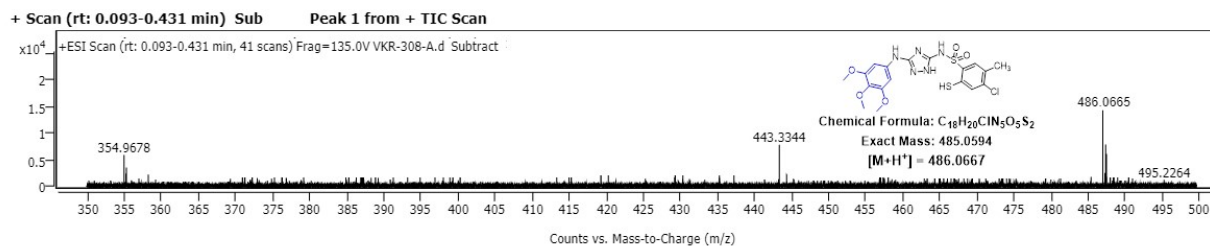

Figure S122. HRMS (ESI+) spectrum of 11e

### Sample Spectra

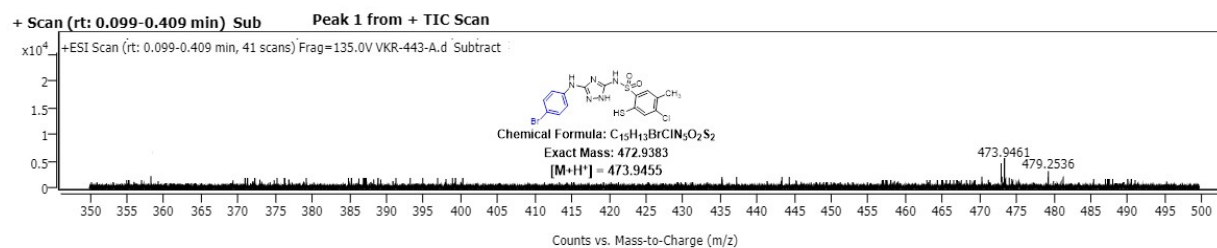

Figure S123. HRMS (ESI+) spectrum of **11f**

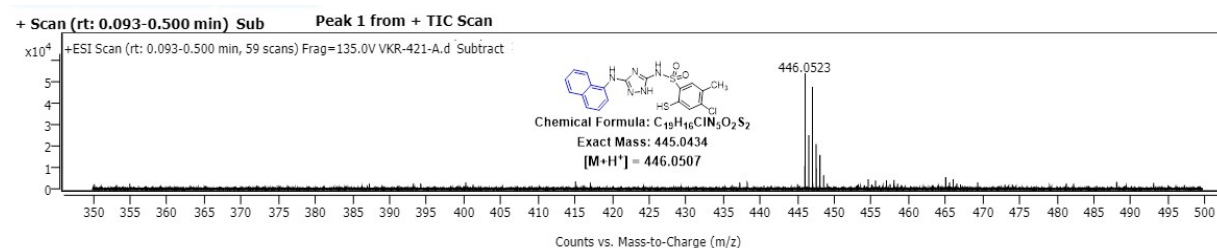

Figure S124. HRMS (ESI+) spectrum of **11g**

### Sample Spectra

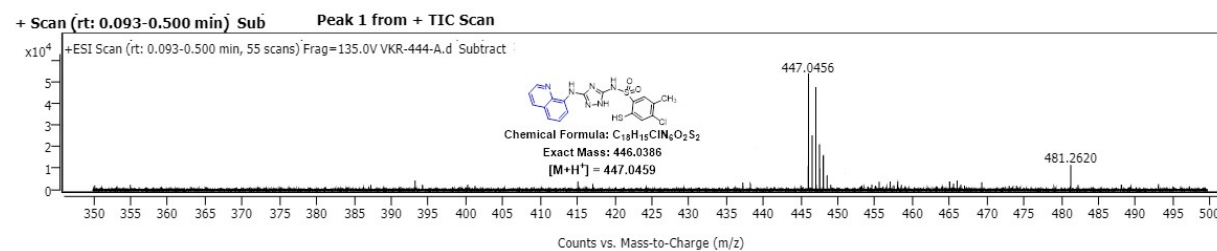

Figure S125. HRMS (ESI+) spectrum of **11h**

### Sample Spectra

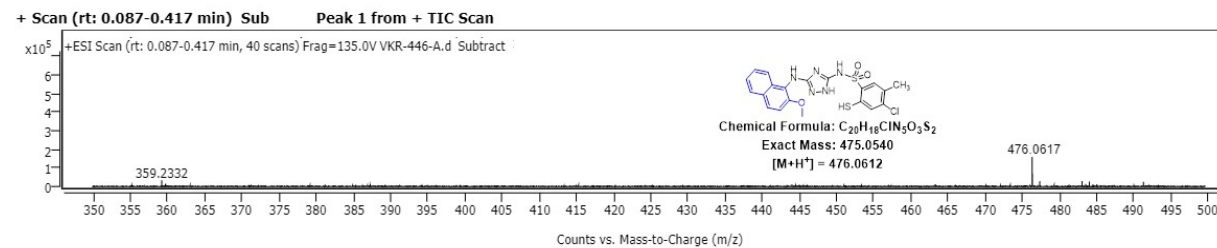

Figure S126. HRMS (ESI+) spectrum of **11i**

### SpectrumIdString

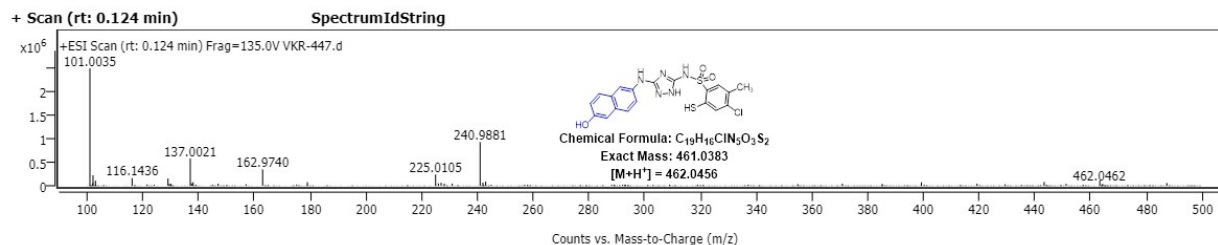

Figure S127. HRMS (ESI+) spectrum of 11j

### Sample Spectra

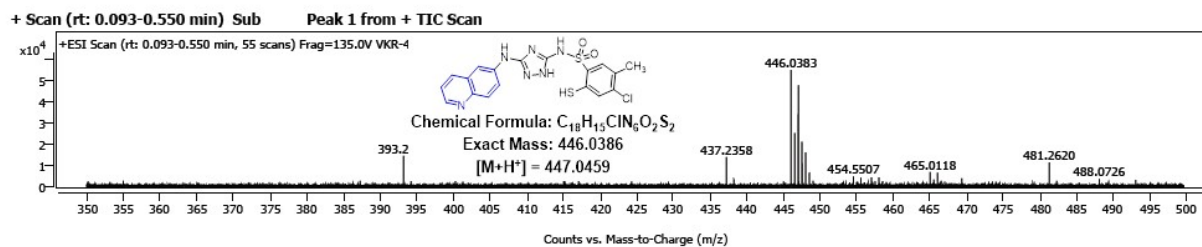

Figure S128. HRMS (ESI+) spectrum of 11k

### Sample Spectra

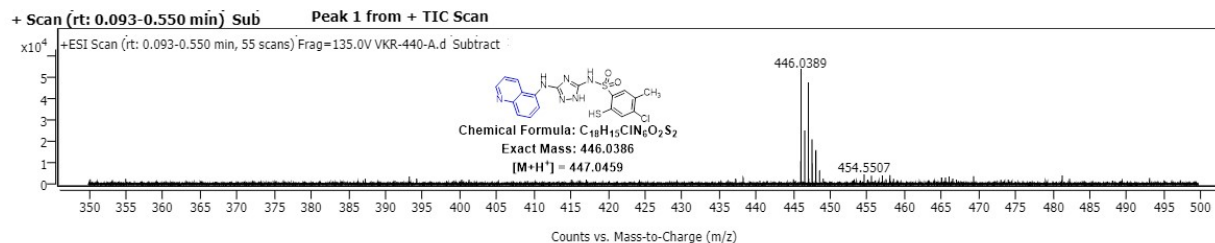

Figure S129. HRMS (ESI+) spectrum of 11l

### Sample Spectra

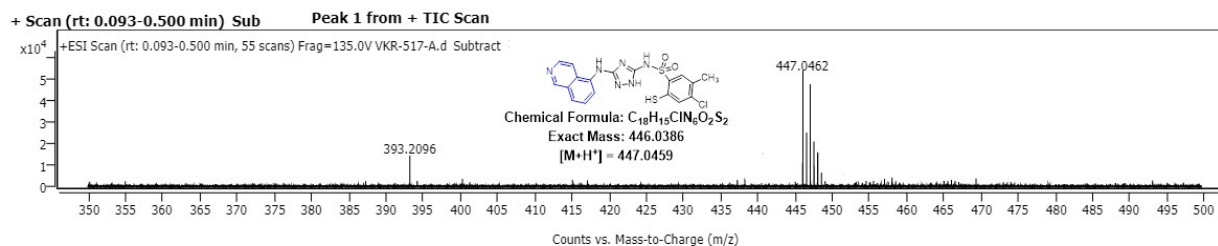

Figure S130. HRMS (ESI+) spectrum of 11m

### Sample Spectra

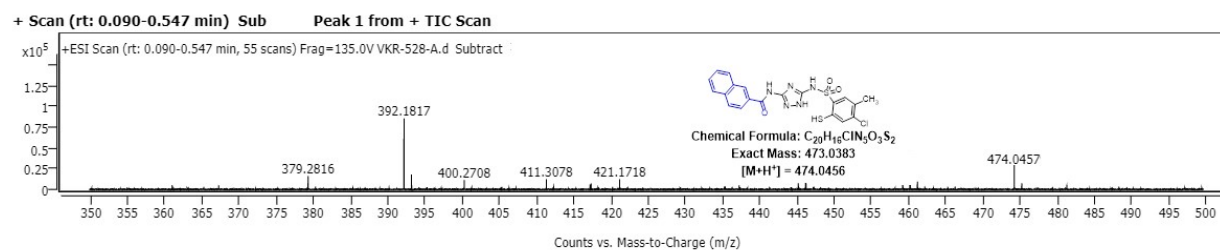

Figure S131. HRMS (ESI+) spectrum of 11n

### SpectrumIdString

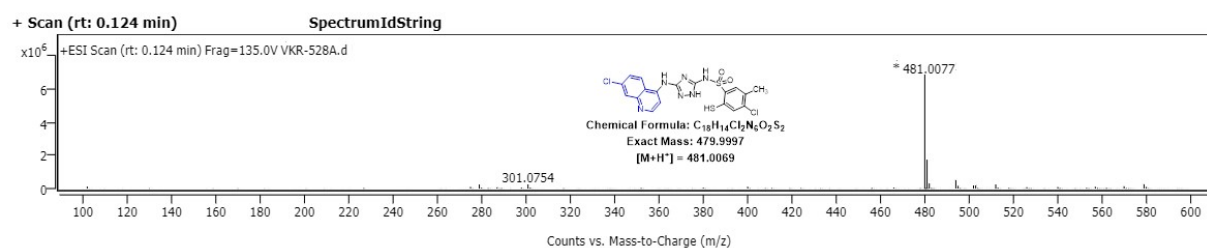

Figure S132. HRMS (ESI+) spectrum of 11o

### Sample Spectra

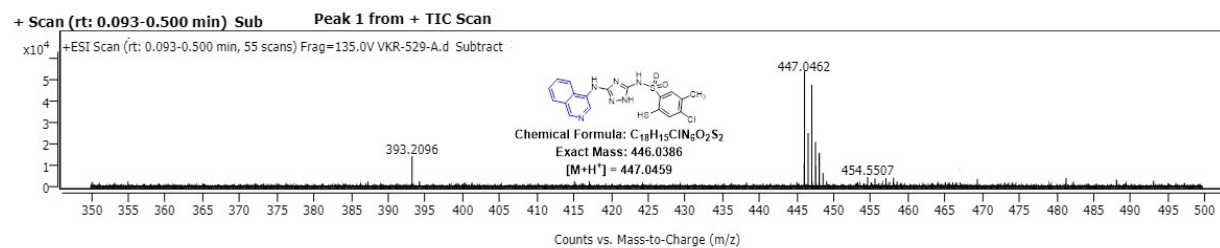

Figure S133. HRMS (ESI+) spectrum of 11p

### Sample Spectra

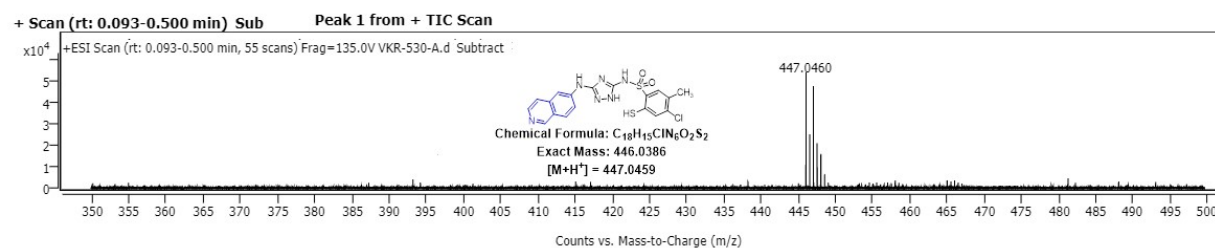

Figure S134. HRMS (ESI+) spectrum of 11q

## Sample Spectra

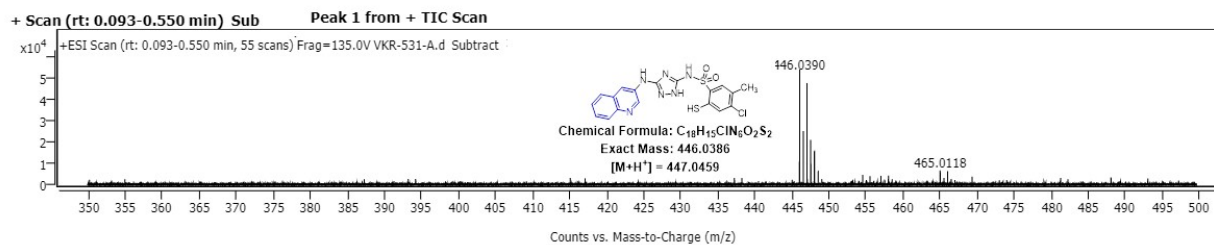

**Figure S135.** HRMS (ESI+) spectrum of **11r**

## SpectrumIdString

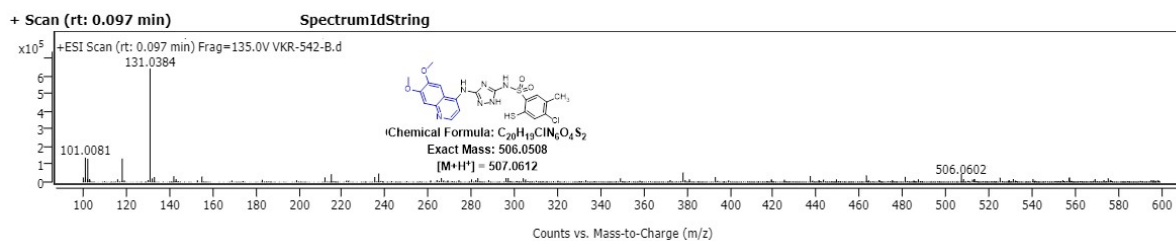

**Figure S136.** HRMS (ESI+) spectrum of **11s**

## 5 HPLC traces of 11a, 10e and 10q

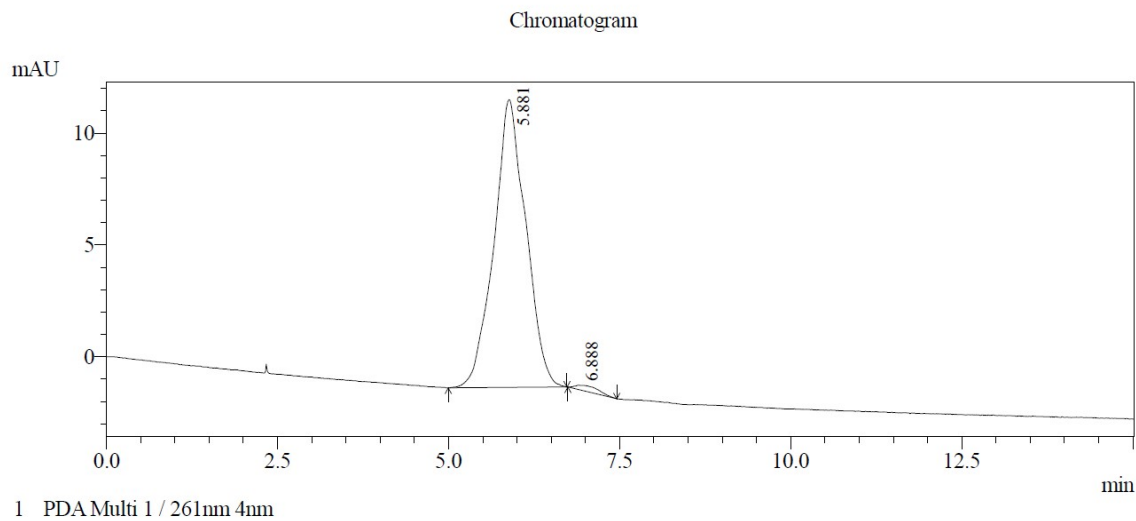

## PeakTable

PDA Ch1 261nm 4nm

| Peak# | Ret. Time | Area   | Height | Area %  | Height % |
|-------|-----------|--------|--------|---------|----------|
| 1     | 5.881     | 418602 | 12873  | 98.663  | 98.592   |
| 2     | 6.888     | 5673   | 184    | 1.337   | 1.408    |
| Total |           | 424275 | 13056  | 100.000 | 100.000  |

**Figure 137.** HPLC chromatogram of compound **11a** (NSC-666719)

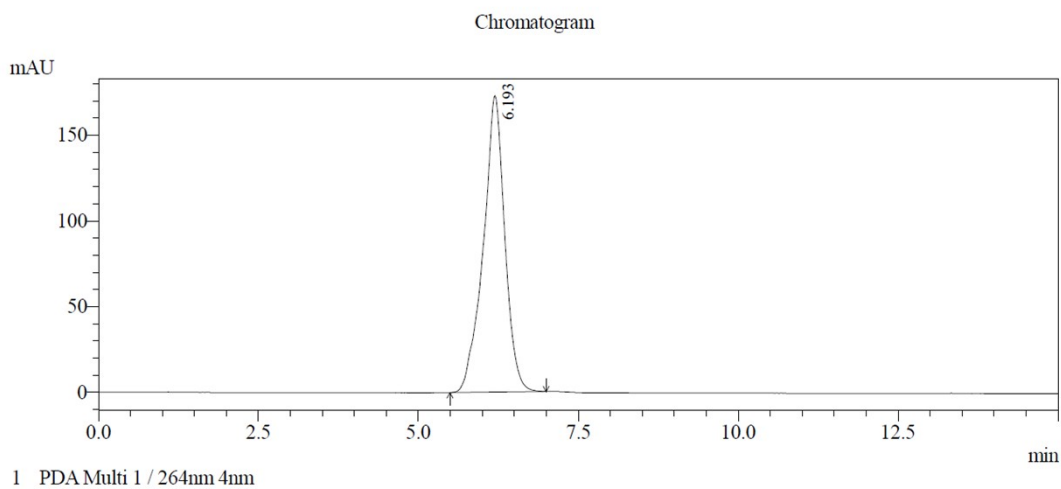

PeakTable

PDA Ch1 264nm 4nm

| Peak# | Ret. Time | Area    | Height | Area %  | Height % |
|-------|-----------|---------|--------|---------|----------|
| 1     | 6.193     | 4051428 | 172973 | 100.000 | 100.000  |
| Total |           | 4051428 | 172973 | 100.000 | 100.000  |

**Figure 138.** HPLC chromatogram of compound **10e**

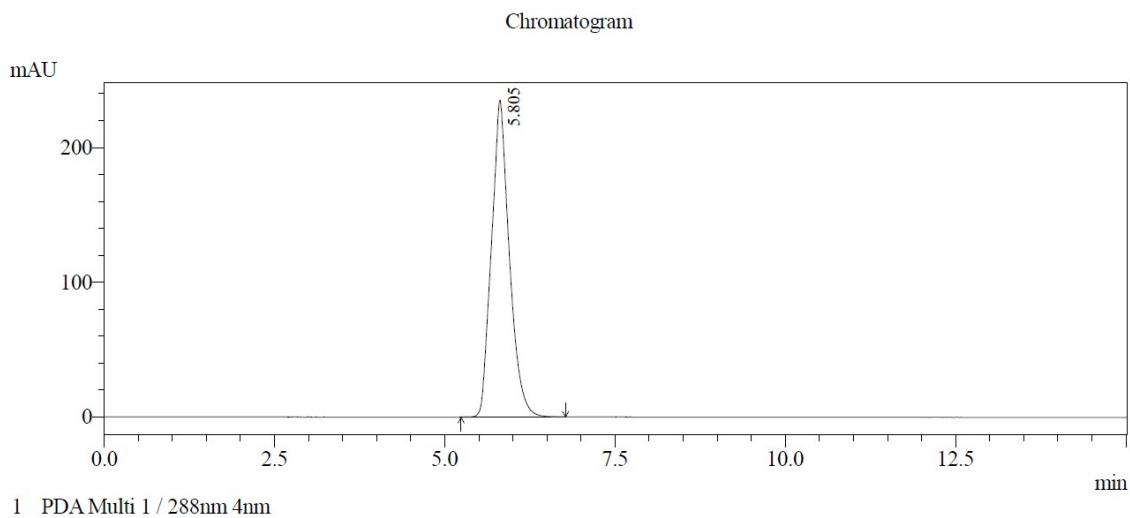

PeakTable

PDA Ch1 288nm 4nm

| Peak# | Ret. Time | Area    | Height | Area %  | Height % |
|-------|-----------|---------|--------|---------|----------|
| 1     | 5.805     | 4283344 | 235138 | 100.000 | 100.000  |
| Total |           | 4283344 | 235138 | 100.000 | 100.000  |

**Figure 139.** HPLC chromatogram of compound **10q**

## 6 X-ray crystallography data of 10b

Table S4: Crystallographic table

| Parameter                                                             | (Z)-2-(6-chloro-7-methyl-1,1-dioxidobenzo[e][1,4,2]dithiazin-3-yl)-1-(4-methoxyphenyl)guanidine (10b) |
|-----------------------------------------------------------------------|-------------------------------------------------------------------------------------------------------|
| Empirical formula                                                     | C <sub>16</sub> H <sub>15</sub> ClN <sub>4</sub> O <sub>3</sub> S <sub>2</sub>                        |
| CCDC number                                                           | 2269969                                                                                               |
| Formula weight                                                        | 410.89                                                                                                |
| Crystal system                                                        | monoclinic                                                                                            |
| Space group                                                           | C2/c                                                                                                  |
| Crystal size/mm <sup>3</sup>                                          | 0.05 × 0.045 × 0.03                                                                                   |
| Radiation                                                             | MoKα (λ = 0.71073)                                                                                    |
| a (Å)                                                                 | 25.8739(6)                                                                                            |
| b (Å)                                                                 | 9.36039(17)                                                                                           |
| c (Å)                                                                 | 14.3273(3)                                                                                            |
| α (°)                                                                 | 90                                                                                                    |
| β (°)                                                                 | 94.120(2)                                                                                             |
| γ (°)                                                                 | 90                                                                                                    |
| V (Å <sup>3</sup> )                                                   | 3460.96(13)                                                                                           |
| Z                                                                     | 8                                                                                                     |
| ρ <sub>calc</sub> (g/cm <sup>-3</sup> )                               | 1.581                                                                                                 |
| Temperature (K)                                                       | 293.0(2)                                                                                              |
| μ/ mm <sup>-1</sup>                                                   | 0.488                                                                                                 |
| 2θ <sub>min, max</sub> (°)                                            | 6.316 to 52.736                                                                                       |
| F (000)                                                               | 1704.0                                                                                                |
| h <sub>min, max</sub> ; k <sub>min, max</sub> ; l <sub>min, max</sub> | -32 ≤ h ≤ 29; -11 ≤ k ≤ 11; -16 ≤ l ≤ 17                                                              |

|                                                                  |                                                                  |
|------------------------------------------------------------------|------------------------------------------------------------------|
| <b>Total no. of reflections</b>                                  | 13987                                                            |
| <b>Independent reflections</b>                                   | 3343 [ $R_{\text{int}} = 0.0343$ , $R_{\text{sigma}} = 0.0334$ ] |
| <b>No. of unique reflections</b>                                 | 3343                                                             |
| <b><math>R_1 [I &gt; 2\sigma(I)]</math></b>                      | $R_1 = 0.0378$ , $wR_2 = 0.0946$                                 |
| <b>Final R indexes [all data] <math>wR_2</math> (all data)</b>   | $R_1 = 0.0457$ , $wR_2 = 0.1001$                                 |
| <b>GooF on <math>F^2</math></b>                                  | 1.095                                                            |
| <b><math>\Delta\rho_{\text{max,min}}/e\text{\AA}^{-3}</math></b> | 0.24/-0.63                                                       |

## 7 References:

- [1] J. Shao, W. Chen, M.A. Giulianotti, R.A. Houghten, Y. Yu, Palladium-catalyzed C–H functionalization using guanidine as a directing group: ortho arylation and olefination of arylguanidines, *Org. Lett.*, 14 (2012) 5452-5455.
- [2] M.Q. Tran, L. Ermolenko, P. Retailleau, T.B. Nguyen, A. Al-Mourabit, Reaction of quinones and guanidine derivatives: simple access to bis-2-aminobenzimidazole moiety of benzosceptrin and other benzazole motifs, *Org. Lett.*, 16 (2014) 920-923.
- [3] H. Huang, W. Guo, W. Wu, C.-J. Li, H. Jiang, Copper-catalyzed oxidative C (sp<sup>3</sup>)–H functionalization for facile synthesis of 1, 2, 4-triazoles and 1, 3, 5-triazines from amidines, *Org. Lett.*, 17 (2015) 2894-2897.
- [4] H.-H. Ha, J.S. Kim, B.M. Kim, Novel heterocycle-substituted pyrimidines as inhibitors of NF- $\kappa$ B transcription regulation related to TNF- $\alpha$  cytokine release, *Bioorg. Med. Chem. Lett.*, 18 (2008) 653-656.
- [5] K. Tsubokura, T. Iwata, M. Taichi, A. Kurbangalieva, K. Fukase, Y. Nakao, K. Tanaka, Direct guanylation of amino groups by cyanamide in water: catalytic generation and activation of unsubstituted carbodiimide by scandium (III) triflate, *Synlett*, 25 (2014) 1302-1306.
- [6] J.W. Shaw, D.H. Grayson, I. Rozas, Cleavage of 2-(Arylamino)-4, 6-dimethoxypyrimidines To Yield Arylguanidines, *Eur. J. Org. Chem.*, 2014 (2014) 3565-3569.



- [7] J.W. Shaw, L. Barbance, D.H. Grayson, I. Rozas, Using N-substituted-2-amino-4, 6-dimethoxypyrimidines in the synthesis of aliphatic guanidines, *Tetrahedron Lett.*, 56 (2015) 4990-4992.
